# Supplementary material for: Steric effects which determine the conformational preferences and stereodynamic processes of aryl fluorenyl ketones
Source: Royal Society of Chemistry journal article supplement (doi:10.1039/b822874d), 2009-01-01
Supplement: b822874d.pdf [file b822874d.pdf]

## SUPPLEMENTARY INFORMATION

### Steric Effects which Determine the Conformational Preferences and Stereodynamic Processes of Aryl Fluorenyl Ketones.

Daniele Casarini,<sup>\*†</sup> Lodovico Lunazzi,<sup>‡</sup> and Andrea Mazzanti<sup>\*‡</sup>

*Department of Chemistry, University of Basilicata, via N. Sauro 85, Potenza 85100, Italy, and*

*Department of Organic Chemistry "A. Mangini", University of Bologna,*

*Viale Risorgimento 4, Bologna 40136, Italy*

casarini@unibas.it, [mazzand@ms.fci.unibo.it](mailto:mazzand@ms.fci.unibo.it)

#### INDEX:

- Figure S1: DFT calculated geometries of **1** (Page S2)
- Figure S2: Low temperature NOE spectrum of **2** (Page S3)
- Figure S3: <sup>13</sup>C Variable Temperature spectra of compound **3** (Page S4)
- Figure S4: <sup>1</sup>H Variable Temperature spectra of compound **3** (Page S5).
- Figure S5: NOE spectrum of **4** (Page S6)
- Figure S6: Stereomutation pathway of **4** (Page S7)
- Experimental details and spectroscopic data for the intermediates (Pages S8-S12)
- X-ray data for compound **3** (Page S13)
- X-ray data for compound **5** (Page S14)
- <sup>1</sup>H and <sup>13</sup>C NMR spectra of **1-5** and of intermediates (Pages S15-S26)
- HPLC analytical traces of **1-5** (Pages S27-S31)
- Selected Chemical shift calculation data for compound **2,4** and **5** (Pages S32-S34)
- Table of computational data of **1** (Page S35)
- Table of DFT computational data of **1-5** (Page S36)
- Computational details of **1-5** (Pages S37-S71)

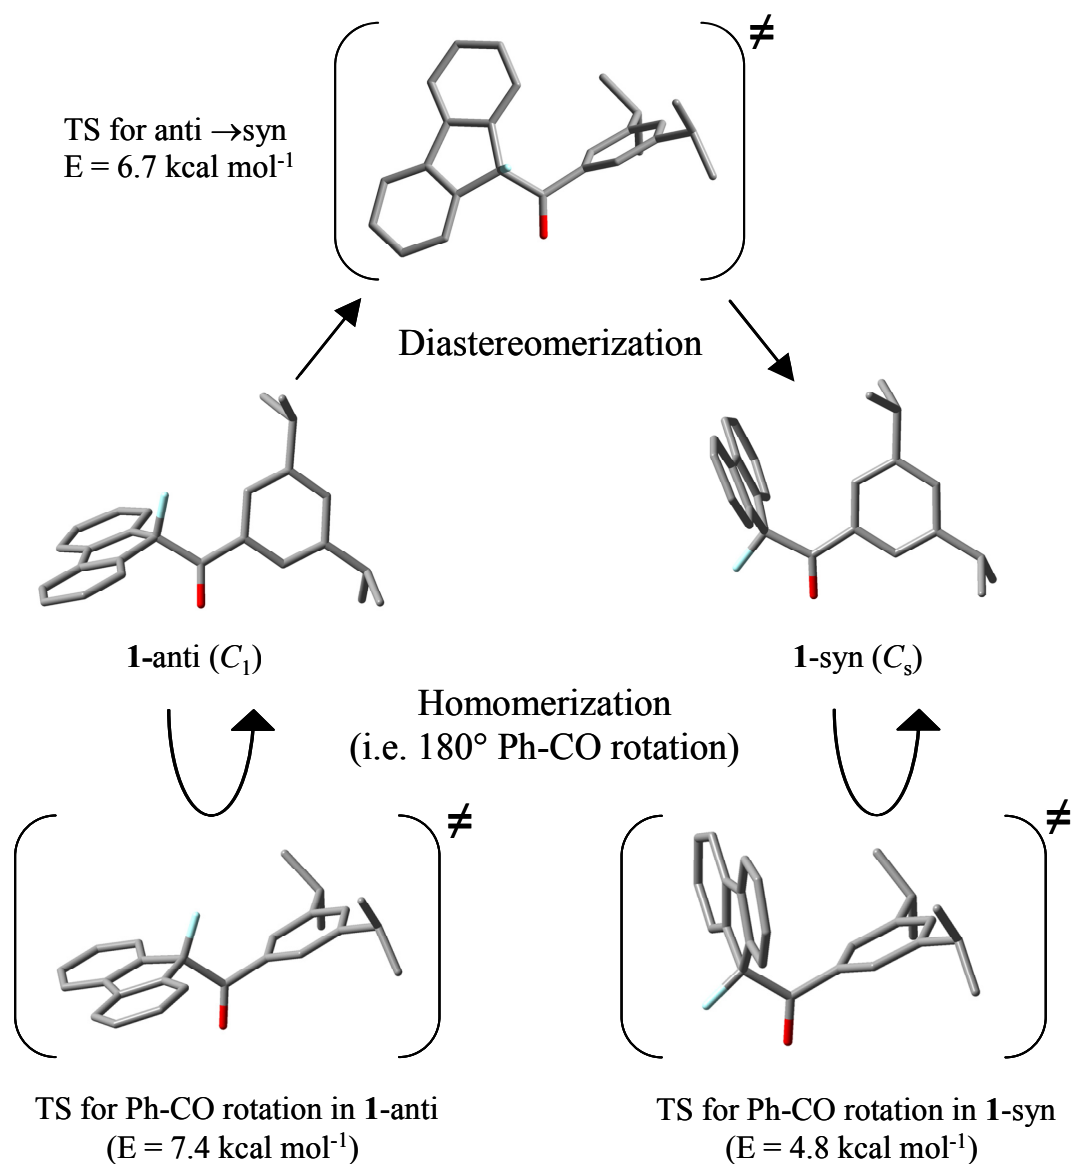

**FIGURE S-1.** Centre: DFT computed ground state conformations **1-anti** ( $C_1$ ) and **1-syn** ( $C_s$ ). Top: Calculated transition state for the anti to syn interconversion (diastereomerization). Bottom: transition states calculated for the Ph-CO bond rotation (homomerization) in **1-anti** (left) and **1-syn** (right)

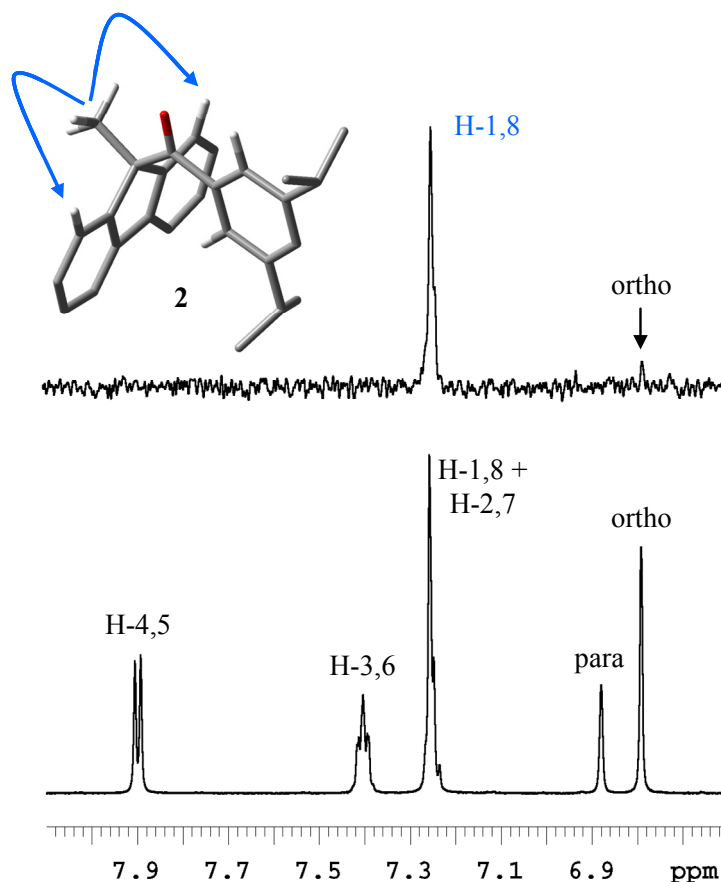

**FIGURE S-2.** Bottom:  $^1\text{H}$  spectrum (600 MHz in  $\text{CD}_2\text{Cl}_2$ ) of the aromatic region of **2** at  $-80\text{ }^\circ\text{C}$ . Top: NOE effect observed by irradiation of the line of the methyl bonded to C-9 (1.62 ppm).

In the **2-anti** conformer the averaged computed distances <sup>a)</sup> are  $3.08\text{ \AA}$  (between Me-9 and H-1,8) and  $2.63\text{ \AA}$  (between Me-9 and H-ortho). In **2-syn** the same distances are  $3.17$  and  $4.94\text{ \AA}$ , respectively. Their ratios elevated to the 6<sup>th</sup> power are  $(2.63 / 3.08)^6 = 0.39$  in **2-anti** and  $(4.94 / 3.17)^6 = 14.3$  in **2-syn**. Thus the distance ratio in **2-syn** agrees with the observation of an almost negligible NOE effect for the H-ortho with respect to the H-1,8 signal, whereas the ratio in **2-anti** does not (in the latter, in fact, the NOE experienced by the H-ortho should be higher than that experienced by the H-1,8 signal). Except for those relevant to NOE analysis, all the hydrogens have been removed in the 3D structure.

<sup>a)</sup> determined as  $\langle r^{-6} \rangle^{-1/6}$ , according to: Claridge, T. D. W. *High-Resolution NMR Techniques in Organic Chemistry*, Pergamon, Oxford, 1999 p 303.

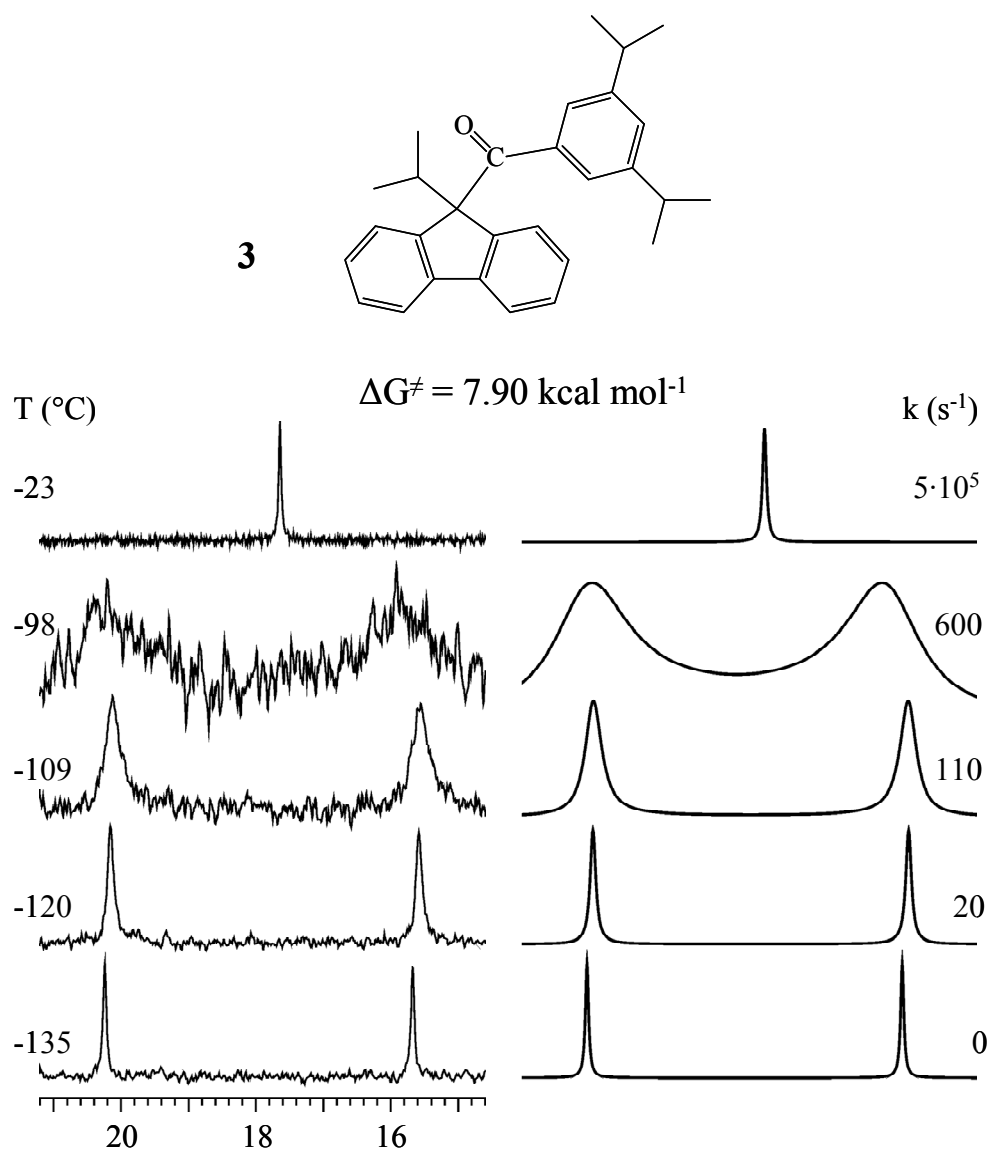

**FIGURE S-3.** Temperature dependence of the <sup>13</sup>C NMR (150.8 MHz in CHF<sub>2</sub>Cl/CHFC<sub>2</sub>) methyl signal of the isopropyl bonded to C-9 of compound **3** (left). On the right the simulation obtained with the rate constants reported.

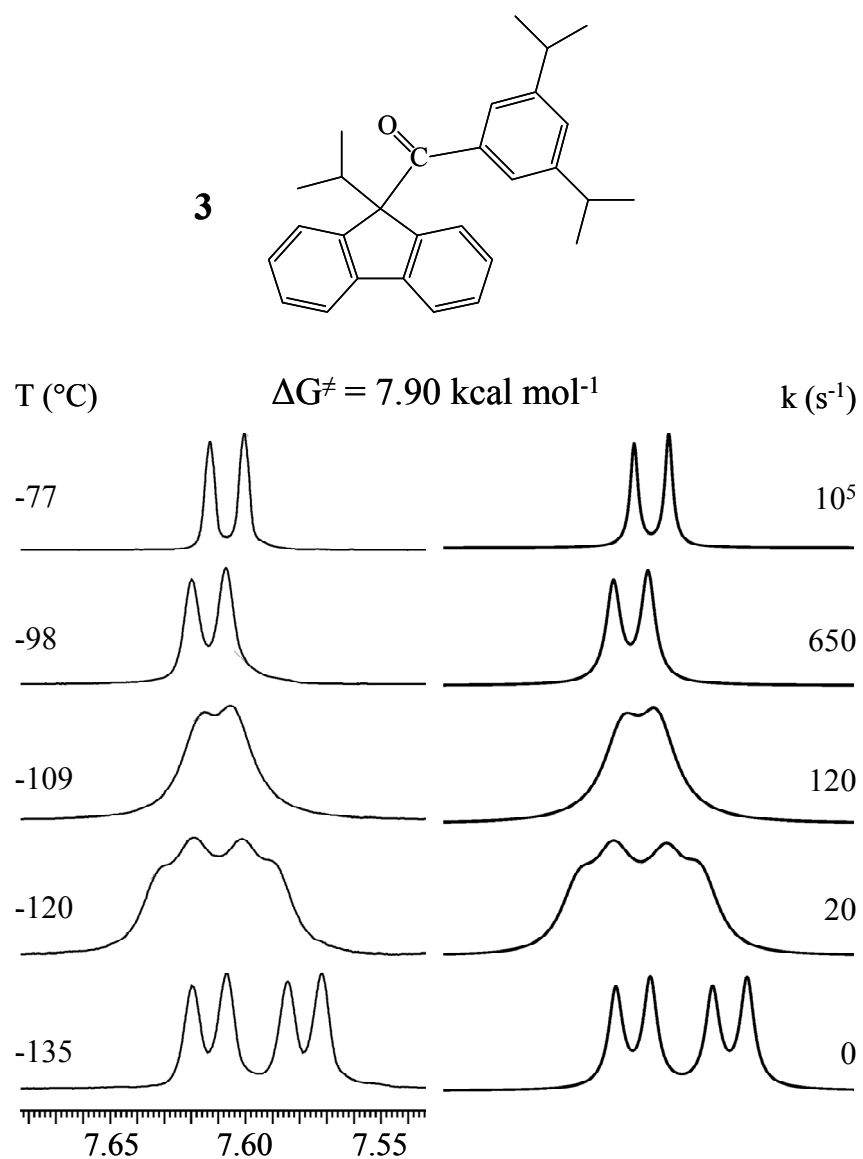

**FIGURE S-4.** Temperature dependence of the  $^1\text{H}$  NMR (600 MHz in  $\text{CHF}_2\text{Cl}/\text{CH}_2\text{Cl}_2$ ) signal of the hydrogens in position 1,8 of the fluorenyl moiety of **3** (left). On the right the simulation obtained with the rate constants reported.

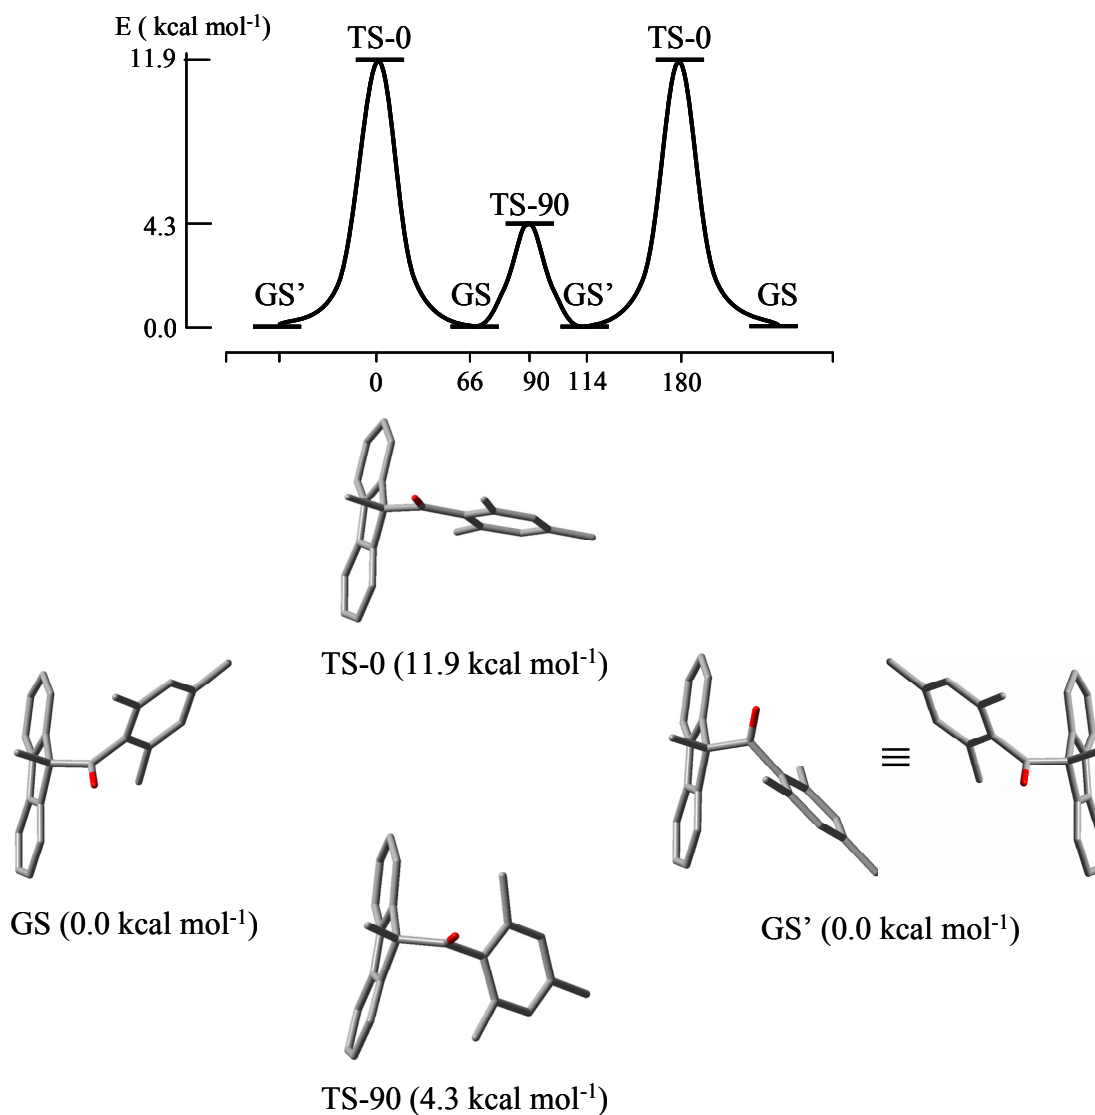

**FIGURE S-5.** Schematic representation of the pathway for the mesityl rotation interconverting the two enantiomers (GS and GS') of **4**; the abscissa scale represent the torsion angle between the plane of C=O and that of the mesityl ring (i.e. the dihedral angle O-C-Cq-C<sub>ortho</sub>). Underneath are displayed the 3D computed structures for the enantiomeric ground states (GS and GS') and the two transition states (TS-0 and TS-90).

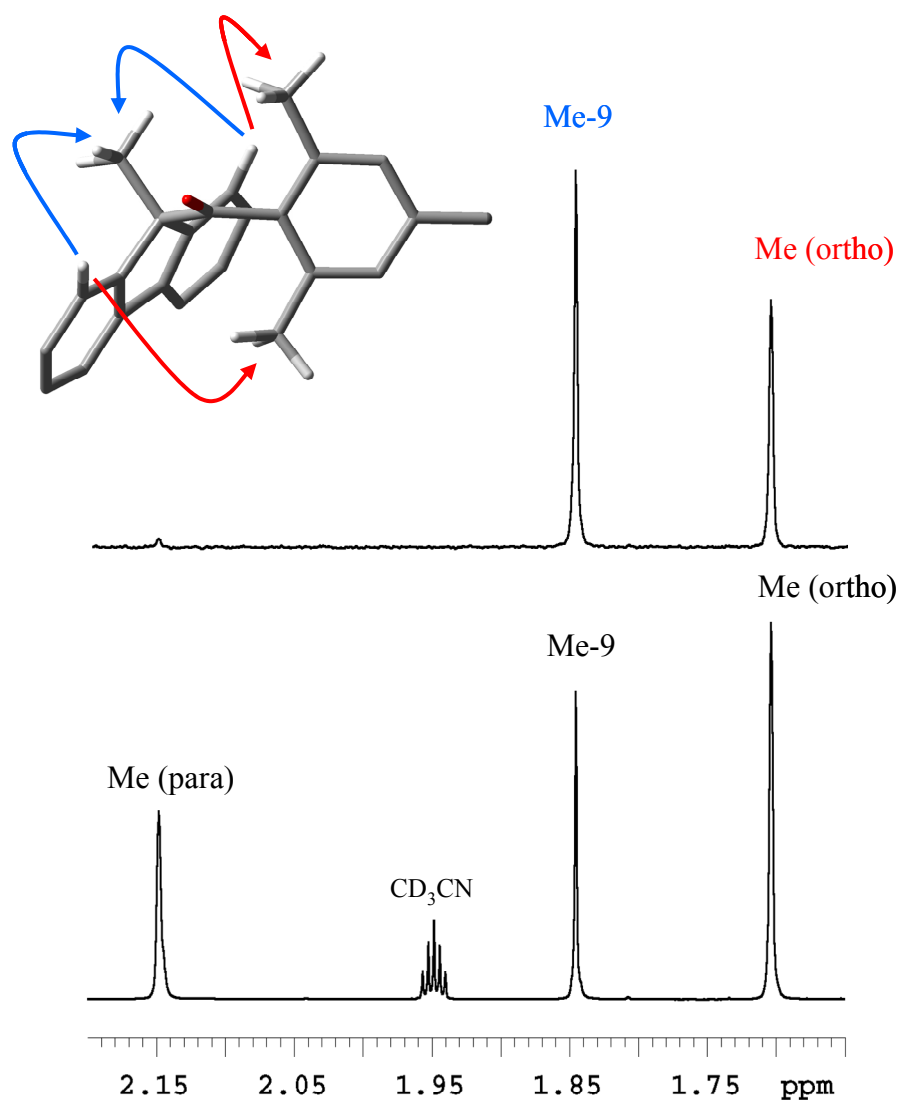

**FIGURE S-6.** Bottom:  $^1\text{H}$  spectrum of the methyl signals of **4** (600 MHz in  $\text{CD}_3\text{CN}$  at  $+25^\circ\text{C}$ ). Top: NOE spectrum obtained by saturation of the 1,8 hydrogens of the fluorene moiety (at 7.49 ppm).

In the syn conformation, the averaged computed distance<sup>a)</sup> between H-1,8 and Me-9 hydrogens is 3.17 Å, that between H-1,8 and the two ortho methyl groups is 3.94 Å. Thus the NOE experienced by Me-9 is expected to be larger than that experienced by the ortho methyls, in agreement with the experimental result (Figure S-6, top). Except for those relevant to NOE analysis, all the hydrogens have been removed in the 3D structure.

<sup>a)</sup> determined as  $\langle r^{-6} \rangle^{-1/6}$ , according to: Claridge, T. D. W. *High-Resolution NMR Techniques in Organic Chemistry*, Pergamon, Oxford, 1999 p 303.

## Experimental procedures for the preparation of the intermediates.

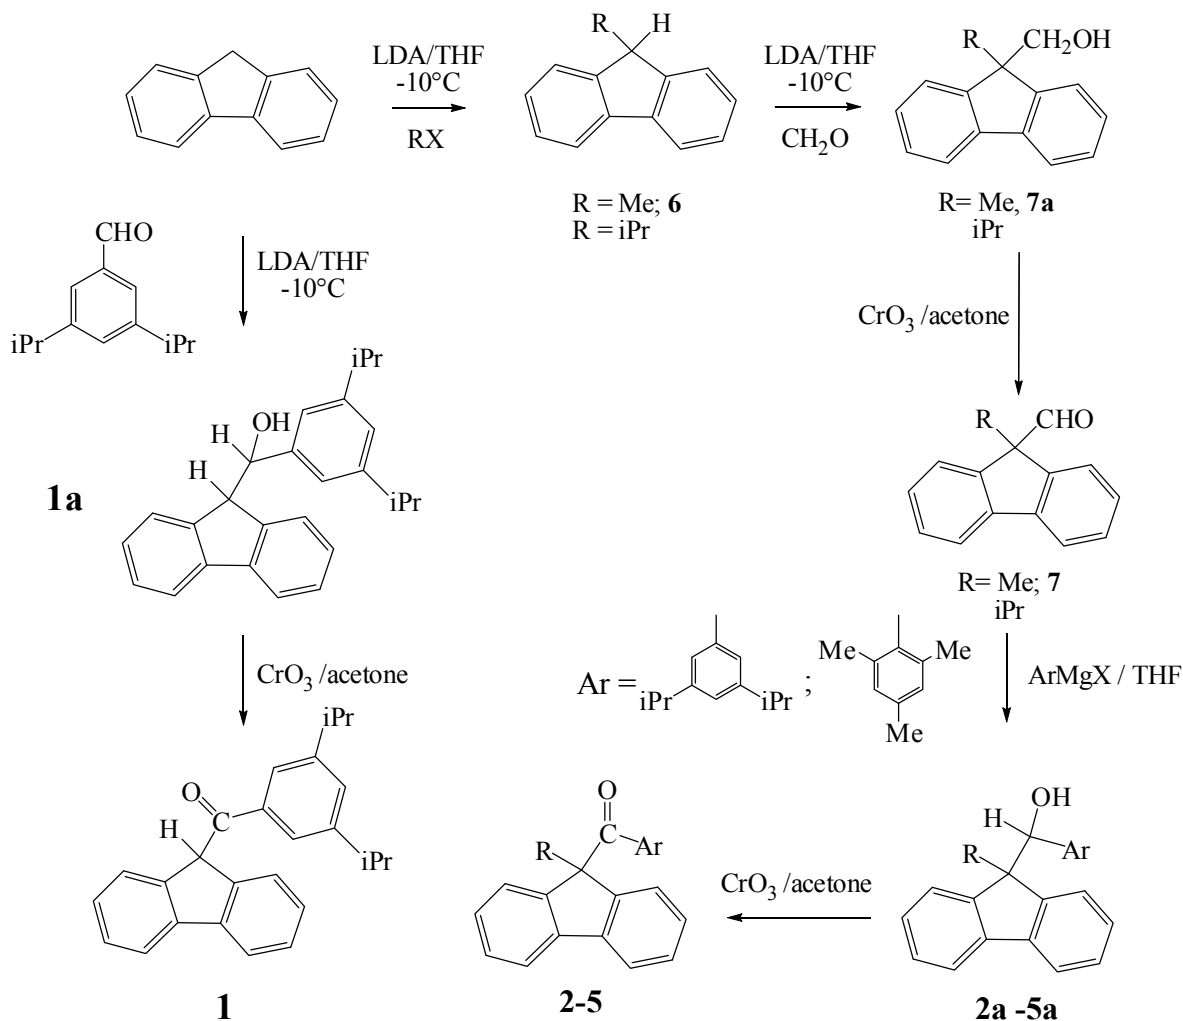

**(3,5-diisopropylphenyl)(9-H-fluorene-9-yl)methanol (1a).** To a stirred solution of *N,N*-diisopropylamine (1.1 mL, 8 mmol in 30 mL of anhydrous THF) kept at  $-10^\circ\text{C}$  under nitrogen, 5.5 mL (8.5 mmol, 1.6M solution) of *n*-BuLi were slowly added. The mixture was allowed to react at  $-10^\circ\text{C}$  for 30 min and then slowly transferred by a double-tipped needle into a solution of 9-fluorene (1.0 g, 6 mmol in 25 mL of anhydrous THF) kept at  $-15^\circ\text{C}$ . The orange solution was stirred at  $-15^\circ\text{C}$  for additional 20 min before adding in 10 min a solution of 3,5-diisopropyl benzaldehyde (10 mmol in 10 mL of dry THF).<sup>21</sup> The solution discharged in short time, and after 15 min of stirring at RT the reaction was quenched with 20 mL of  $\text{H}_2\text{O}$ . The extracted organic layer ( $\text{Et}_2\text{O}$ ) was dried ( $\text{Na}_2\text{SO}_4$ ) and evaporated. The crude was purified by a silica gel



chromatography column (petroleum ether/EtAc 90:10) to give the intermediate alcohol (yield 74%) as white solid that was used in the next step. <sup>1</sup>H-NMR (CDCl<sub>3</sub>, 600 MHz) δ 1.19 (6H, d, J = 6.9 Hz), 2.10 (1H, d, J = 3.5 Hz), 2.85 (2H, m, J = 6.9 Hz), 4.37 (1H, d, J = 6.3 Hz), 5.03 (1H, dd, J = 6.3, 3.5 Hz), 6.94 (2H, d, J = 1.7 Hz), 6.98 (1H, t, J = 1.7 Hz), 7.05 (1H, d, J = 7.5 Hz), 7.18 (1H, dt, J = 7.5, 1.1 Hz), 7.25 (1H, dt, J = 7.5, 1.1 Hz), 7.34 (1H, t, J = 7.6 Hz), 7.37 (1H, t, J = 7.6 Hz), 7.45 (1H, d, J = 7.6 Hz), 7.67 (1H, d, J = 7.6 Hz), 7.69 (1H, d, J = 7.6 Hz). <sup>13</sup>C-NMR (CDCl<sub>3</sub>, 150.8 MHz) δ 23.9 (2CH<sub>3</sub>), 24.0 (2CH<sub>3</sub>), 34.2 (2CH), 54.9 (CH), 76.9 (OCH), 119.6 (CH), 119.7 (CH), 122.3 (2CH), 124.3 (CH), 125.9 (CH), 126.3 (CH), 126.4 (CH), 126.5 (CH), 127.4 (CH), 127.5 (CH), 141.7 (2Cq), 141.8 (Cq), 143.4 (Cq), 143.9 (Cq), 148.6 (2Cq).

**(3,5-Diisopropylphenyl)(9-H-fluoren-9-yl)methanone (1).**

To a solution of **1a** (0.1 g, 10 mmol) in acetone, solid CrO<sub>3</sub> (0.4g, 10 mmol) <sup>22</sup> was added in small portions under fast stirring, and the temperature was kept below 25°C. The reaction was monitored by TLC until the alcohol disappeared, then the solvent was evaporated at reduced pressure and ambient temperature. The crude was purified by a silica gel chromatography column (petroleum ether/EtAc 95:5) to give the desired product (yield 68%) as a white solid. Analytically pure samples were obtained by semipreparative HPLC on a C18 column (t<sub>r</sub> = 14.38 min, Luna C18(2), 5 μm, 250 × 10 mm, Acetonitrile/H<sub>2</sub>O 90:10 v:v, 5 mL/min).

**(9-Methyl-fluorene-9-yl)methanol (7a)** <sup>23</sup>: as for **1a**, a stirred solution of LDA was prepared and slowly added to fluorene (2.7 g, 16.3 mmol in 15 mL of anhydrous THF). After stirring for 20 min at -10°C a solution of methyl iodide (1 mL, 16.5 mmol in 5 mL of dry THF) was dropped in 10 min to the orange solution and the color turned in short time to pale yellow. A small portion of the mixture was purified by chromatography on silica gel to isolate 9-methyl-9H-fluorene **6** (yield 85% by GC-MS).<sup>24</sup> The remaining reaction mixture was cooled again to -10°C, and a solution of *n*-BuLi (11 mL, 17.5 mmol) 1.6 M in hexane was slowly added. After 15 min at -10°C, solid CH<sub>2</sub>O (0.6 g, 20 mmol) was added in one pot to the reddish-wine solution. The reaction resulted slightly exothermic and the temperature raised slowly to +30°C, while the wine-red color turned to yellow in a short time. The reaction was quenched with 40 mL of H<sub>2</sub>O, and extracted with Et<sub>2</sub>O (3 × 15 mL). The collected organic layers were dried (Na<sub>2</sub>SO<sub>4</sub>) and evaporated. The crude was purified by a silica gel chromatography column (petroleum ether /EtAc 90:10) to give 2.7 g of (9-methyl-fluorene-9-yl) methanol (total yield 80%) as a white solid. <sup>1</sup>H-NMR (CDCl<sub>3</sub>, 600 MHz) δ 1.40 (1H, br s), 1.47 (3H, s), 3.78 (2H, s), 7.32 (2H, dt, J = 7.5, 1.1 Hz), 7.37 (2H, dt, J = 7.5, 1.1

Hz), 7.47 (2H, d, J = 7.7 Hz), 7.74 (2H, d, J = 7.7 Hz). <sup>13</sup>C-NMR (CDCl<sub>3</sub>, 150.8 MHz) δ 21.0 (CH<sub>3</sub>), 52.6 (Cq), 70.0 (OCH<sub>2</sub>), 120.1 (2CH), 123.2 (2CH), 127.3 (2CH), 127.6 (2CH), 140.4 (2Cq), 149.3 (2Cq).

**9-Methyl-fluorene-9-carboxyaldehyde (7)**<sup>25</sup>: to a solution of (9-Methyl-fluorene-9-yl)methanol (1.3 g, 6.2 mmol) in 30 mL of acetone solid CrO<sub>3</sub> (1.3 g, 13 mmol) was added in small quotes, keeping the temperature below + 35°C. The end of the reaction was monitored by TLC; then the solvent was evaporated at ambient temperature and reduced pressure. The crude was purified by a silica gel chromatography column (petroleum ether/EtAc 95:5) to give 0.9 g of white solid (yield 71%). <sup>1</sup>H-NMR (CDCl<sub>3</sub>, 600 MHz) δ 1.68 (3H, s), 7.37 (2H, dt, J = 7.4, 1.0 Hz), 7.40 (2H, d, J = 7.4, 1.0 Hz), 7.46 (2H, dt, J = 7.5, 1.2 Hz), 7.81 (2H, d, J = 7.5 Hz), 8.78 (1H, s). <sup>13</sup>C-NMR (CDCl<sub>3</sub>, 150.8 MHz) δ 17.1 (2CH<sub>3</sub>), 63.3 (Cq), 120.6 (CH), 124.9 (CH), 128.2 (CH), 129.0 (CH), 142.1 (2Cq), 144.1 (2Cq), 197.3 (CH).

**(3,5-Diisopropylphenyl)-(9-methyl-fluorene-9-yl)methanol (2a)**: To a suspension of Mg (0.044 g, 1.8 mmol) in 25 ml of dry THF was slowly dropped (20 min) a solution of 1-Bromo-3,5-diisopropylbenzene (0.45g, 1.8 mmol) in 10 ml of dry THF). After refluxing for 2h, the mixture was cooled to room temperature and a solution of 9-methyl-fluorene-9-carboxyaldehyde (0.31 g, 1.45 mmol) in 10 ml of dry THF was slowly added in 10 min. After 1h of additional stirring at +25°C the end of the reaction was checked by GC-MS. The mixture was treated with H<sub>2</sub>O (40 mL), extracted with Et<sub>2</sub>O (3x15 mL) and dried (Na<sub>2</sub>SO<sub>4</sub>). After removing the solvent, the crude was purified by a silica gel chromatography column (petroleum ether/EtAc 9:1) to give 0.44 g of the alcohol as a white solid (yield 80%). <sup>1</sup>H-NMR (CDCl<sub>3</sub>, 600 MHz) δ 0.99 (12H, d, J = 7.0 Hz), 1.54 (1H, s), 1.68 (3H, s), 2.61 (2H, septet, J = 7.0 Hz), 7.22 (2H, m), 7.28 (2H, m), 7.34 (1H, d, J = 6.1 Hz), 7.48 (1H, d, J = 6.1 Hz), 7.52 (1H, d, J = 6.1 Hz), 7.57 (1H, d, J = 6.1 Hz). <sup>13</sup>C-NMR (CDCl<sub>3</sub>, 150.8 MHz) δ 21.5 (CH<sub>3</sub>), 23.8 (2CH<sub>3</sub>), 23.9 (2CH<sub>3</sub>), 33.9 (2CH), 55.8 (Cq), 80.9 (CH), 119.5 (CH), 119.6 (CH), 122.7 (2CH), 124.1 (CH), 124.4 (CH), 125.1 (CH), 126.4 (CH), 126.7 (CH), 127.2 (CH), 127.3 (CH), 139.8 (Cq), 140.5 (Cq), 140.8 (Cq), 147.2 (2Cq), 148.5 (Cq), 149.2 (Cq).

**(3,5-Diisopropylphenyl)-(9-methyl-fluorene-9-yl)methanone(2)**: To a solution of **2a** (0.44 g, 1.2 mmol) in acetone (25 mL), solid CrO<sub>3</sub> was added in small quotes (0.25 g, 2.5 mmol) under rapid stirring, keeping the temperature below +25°C. The reaction was monitored by TLC until the alcohol disappeared, then the solvent was evaporated at reduced pressure and ambient temperature.

The crude was purified by a silica gel chromatography column (petroleum ether/EtAc 95:5) to give 0.26 g of pale yellow solid. (yield 60%). Analytically pure samples of **2** were obtained by semipreparative HPLC on a C18 column ( $t_r$  = 18.42 min, Luna C18(2), 5  $\mu$ m, 250  $\times$  10 mm, Acetonitrile/H<sub>2</sub>O 90:10 v:v, 5 mL/min).

Compound **3** was prepared following the same procedure use in the preparation of **2**, using 9-isopropyl-fluorene-9-carboxyaldehyde<sup>5b</sup>. Analytically pure samples of **3** were obtained by semipreparative HPLC on a C18 column ( $t_r$  = 19.90 min, Luna C8(2), 5  $\mu$ m, 250  $\times$  10 mm, Acetonitrile/H<sub>2</sub>O 90:10 v:v, 5 mL/min). Crystals suitable for X-ray diffraction analysis were obtained by slow evaporation of an hexane solution.

**(3,5-Diisopropylphenyl)(9-isopropyl-fluoren-9-yl)methanol (3a):** <sup>1</sup>H-NMR (CDCl<sub>3</sub>, 600 MHz)  $\delta$  0.32 (3H, d, J = 6.7 Hz), 0.850 (6H, d, J = 6.9 Hz), 0.847 (6H, d, J = 6.9 Hz), 1.46 (3H, d, J = 6.7 Hz), 2.02 (1H, d, J = 2.6 Hz), 2.45 (2H, septet, J = 6.9 Hz), 2.98 (1H, septet, J = 6.7 Hz), 5.49 (1H, d, J = 2.6 Hz), 6.20 (2H,d, J = 1.7 Hz), 6.50 (1H, t, J = 1.7 Hz), 7.16 (1H, dt, J = 7.6, 1.2 Hz), 7.21 (1H, dt, J = 7.6, 1.2 Hz), 7.24 (1H, dt, J = 7.6, 1.2 Hz), 7.31(1H, dt, J = 7.6, 1.2 Hz), 7.35 (1H, d, J = 7.4 Hz), 7.37 (1H, d, J = 7.4 Hz), 7.55 (1H, d, J = 7.4 Hz), 7.86 (1H, d, J = 7.4 Hz). <sup>13</sup>C-NMR (CDCl<sub>3</sub>, 150.8 MHz)  $\delta$  18.1 (CH<sub>3</sub>), 18.6 (CH<sub>3</sub>), 23.99 (2CH<sub>3</sub>), 24.01 (2CH<sub>3</sub>), 32.4 (CH), 34.0 (2CH), 63.5 (Cq), 77.7 (CH), 119.2 (CH), 119.7 (CH), 122.7 (2CH), 123.9 (CH), 125.7 (CH), 125.9 (CH), 126.1 (CH), 126.7 (CH), 127.19 (CH), 127.21 (CH), 140.3 (Cq), 141.8 (Cq), 142.3 (Cq), 146.0 (Cq), 146.9 (2Cq), 147.9 (Cq).

Compound **4** was prepared following the same procedure use in the preparation of **2**, using mesityl bromide to prepare the Grignard reagent. Analytically pure samples of **4** were obtained by semipreparative HPLC on a C18 column ( $t_r$  = 10.55 min, Luna C18(2), 5  $\mu$ m, 250  $\times$  10 mm, Acetonitrile/H<sub>2</sub>O 90:10 v:v, 5 mL/min).

**Mesityl(9-methyl-fluoren-9-yl)methanol (4a):** <sup>1</sup>H-NMR (CDCl<sub>3</sub>, 600 MHz)  $\delta$  1.44 (3H, s), 1.60 (3H, s), 1.95 (1H, d, J = 3.7 Hz), 2.27 (3H, s), 2.53 (3H, s), 4.93 (1H, d, J = 3.7 Hz), 6.52 (1H, d, J = 7.6 Hz), 6.64 (1H, s), 6.90 (1H, s), 7.03 (1H, dt, J = 7.5, 1.1 Hz), 7.28 (1H, dt, J = 7.5, 1.1 Hz), 7.29 (1H, dt, J = 7.5, 1.1 Hz), 7.38 (1H, dt, J = 7.5, 1.1 Hz), 7.61 (1H, d, J = 7.5 Hz), 7.69 (1H, d, J = 7.5 Hz), 7.74 (1H, d, J = 7.5 Hz). <sup>13</sup>C-NMR (CDCl<sub>3</sub>, 150.8 MHz)  $\delta$  20.4 (CH<sub>3</sub>), 20.9 (CH<sub>3</sub>), 21.2

(CH<sub>3</sub>), 22.7 (CH<sub>3</sub>), 57.5 (Cq), 76.5 (CH), 119.8 (CH), 120.1 (CH), 125.0 (CH), 125.4 (CH), 126.9 (CH), 127.1 (CH), 127.6 (CH), 127.7 (CH), 129.1 (CH), 131.9 (CH), 133.6 (Cq), 136.8 (Cq), 138.20 (Cq), 138.25 (Cq), 139.8 (Cq), 140.8 (Cq), 149.2 (Cq), 152.2 (Cq).

Compound **5** was prepared following the same procedure use in the preparation of **2**, using mesityl bromide to prepare the Grignard reagent and 9-isopropyl-fluorene-9-carboxyaldehyde<sup>5b</sup>. Analytically pure samples of **5** were obtained by semipreparative HPLC on a C18 column (*t<sub>r</sub>* = 16.80 min, Luna C18(2), 5 μm, 250 × 10 mm, Acetonitrile/H<sub>2</sub>O 90:10 v:v, 5 mL/min). Crystals suitable for X-ray diffraction analysis were obtained by slow evaporation of an hexane solution.

**Mesityl(9-isopropyl-fluoren-9-yl)methanol (5a):** <sup>1</sup>H-NMR (CDCl<sub>3</sub>, 600 MHz) δ 0.63 (3H, d, J = 6.7 Hz), 0.99 (6H, d, J = 6.7 Hz), 1.60 (3H, s), 1.78 (1H, d, J = 4.2 Hz), 2.16 (3H, s), 2.29 (3H, s), 2.60 (1H, septet, J = 6.7 Hz), 5.86 (1H, d, J = 4.2 Hz), 6.55 (1H, s), 6.69 (1H, s), 6.93 (1H, d, J = 7.6 Hz), 6.99 (1H, dt, J = 7.6, 1.2 Hz), 7.22 (1H, dt, J = 7.6, 1.2 Hz), 7.25 (1H, dt, J = 7.6, 1.2 Hz), 7.36(1H, dt, J = 7.6, 1.2 Hz), 7.50 (1H, d, J = 7.6 Hz), 7.60 (1H, d, J = 7.6 Hz), 7.69 (1H, d, J = 7.6 Hz). <sup>13</sup>C-NMR (CDCl<sub>3</sub>, 150.8 MHz) δ 18.9 (CH<sub>3</sub>), 19.6 (CH<sub>3</sub>), 20.6 (CH<sub>3</sub>), 21.0 (CH<sub>3</sub>), 22.0 (CH<sub>3</sub>), 35.0 (CH), 64.4 (Cq), 75.1 (CH), 119.1 (CH), 119.6 (CH), 125.8 (CH), 126.1 (CH), 126.3 (CH), 126.8 (CH), 127.3 (CH), 127.4 (CH), 128.8 (CH), 131.3 (CH), 135.1 (Cq), 136.4 (2Cq), 138.3 (Cq), 141.1 (Cq), 142.4 (Cq), 146.5 (Cq), 148.1 (Cq).

### Crystal Data for 3

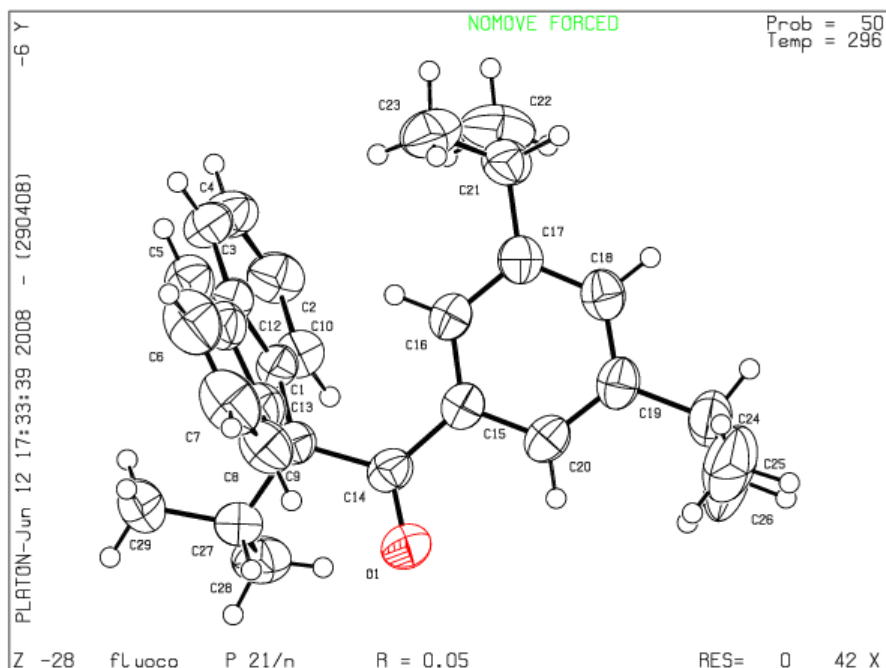

Crystals obtained from hexane, molecular formula:  $C_{29}H_{22}O$ ,  $M_r = 396.55$ , monoclinic, space group  $P2_1/n$  (No. 14),  $a = 11.5913(16)$ ,  $b = 9.2125(13)$ ,  $c = 22.2062(32)$  Å,  $\beta = 99.490(2)$ ,  $V = 2338.8(6)$  Å<sup>3</sup>,  $T = 298(2)$  K,  $Z = 4$ ,  $\rho_c = 1.126$  g cm<sup>-3</sup>,  $F(000) = 856$ , graphite-monochromated  $Mo_{K\alpha}$  radiation ( $\lambda = 0.71073$  Å),  $\mu(Mo_{K\alpha}) = 0.066$  mm<sup>-1</sup>, colourless brick ( $0.4 \times 0.4 \times 0.2$  mm<sup>3</sup>), empirical absorption correction with SADABS (transmission factors: 0.9741 – 0.9869), 2400 frames, exposure time 10 s,  $1.86 \leq \theta \leq 27.50$ ,  $-15 \leq h \leq 14$ ,  $-11 \leq k \leq 11$ ,  $-28 \leq l \leq 28$ , 25573 reflections collected, 5625 independent reflections ( $R_{int} = 0.0229$ ), solution by direct methods (SHELXS97<sup>a</sup>) and subsequent Fourier syntheses, full-matrix least-squares on  $F_o^2$  (SHELX97), hydrogen atoms refined with a riding model, data / restraints / parameters = 5325/ 0 / 277,  $S(F^2) = 1.054$ ,  $R(F) = 0.0723$  and  $wR(F^2) = 0.1737$  on all data,  $R(F) = 0.0539$  and  $wR(F^2) = 0.1563$  for 3888 reflections with  $I > 2\sigma(I)$ , weighting scheme  $w = 1/[\sigma^2(F_o^2) + (0.0849P)^2 + 0.5106P]$  where  $P = (F_o^2 + 2F_c^2)/3$ , largest difference peak and hole 0.803 and  $-0.202$  e Å<sup>-3</sup>. Crystallographic data (excluding structure factors) for the structure reported in this paper have been deposited with the Cambridge Crystallographic Data Centre as supplementary publication no. CCDC-XXXXXX. Copies of the data can be obtained free of charge on application to CCDC, 12 Union Road, Cambridge CB21EZ, UK (fax: (+44) 1223-336-033; e-mail: [deposit@ccdc.cam.ac.uk](mailto:deposit@ccdc.cam.ac.uk)).

## Crystal Data for 5

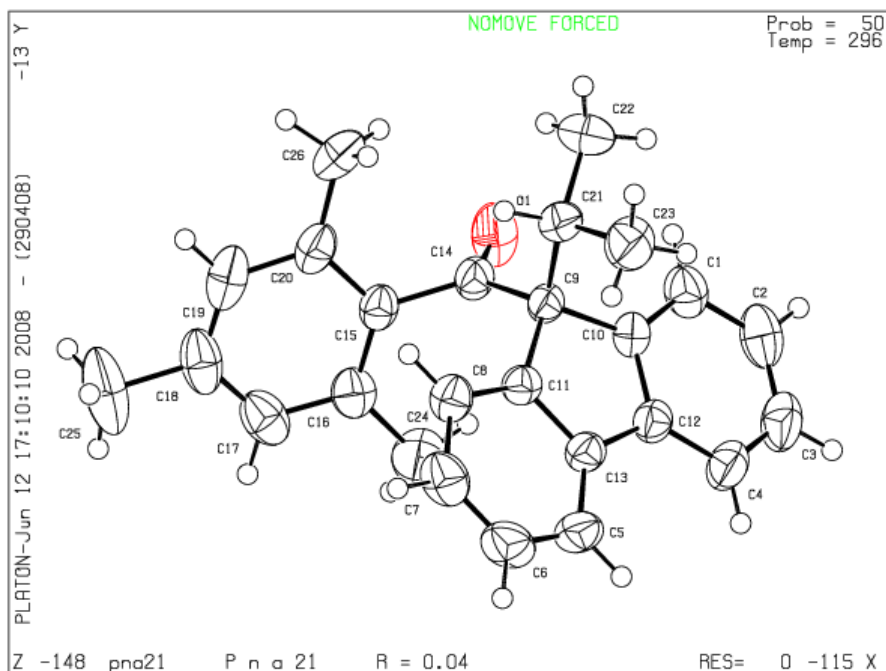

Crystals obtained from hexane, molecular formula:  $C_{26}H_{26}O$ ,  $M_r = 354.47$ , orthorhombic, space group  $Pna_2/1$  (No. 33),  $a = 17.0726(14)$ ,  $b = 7.4102(6)$ ,  $c = 16.2202(14)$  Å,  $V = 2052.0(3)$  Å<sup>3</sup>,  $T = 298(2)$  K,  $Z = 4$ ,  $\rho_c = 1.147$  g cm<sup>-3</sup>,  $F(000) = 760$ , graphite-monochromated  $Mo_{K\alpha}$  radiation ( $\lambda = 0.71073$  Å),  $\mu(Mo_{K\alpha}) = 0.068$  mm<sup>-1</sup>, colourless block ( $0.5 \times 0.3 \times 0.2$  mm<sup>3</sup>), empirical absorption correction with SADABS (transmission factors: 0.9866 – 0.9669), 2400 frames, exposure time 10 s,  $2.39 \leq \theta \leq 28.72$ ,  $-21 \leq h \leq 22$ ,  $-10 \leq k \leq 9$ ,  $-21 \leq l \leq 20$ , 22311 reflections collected, 4980 independent reflections ( $R_{int} = 0.0186$ ), solution by direct methods (SHELXS97<sup>a</sup>) and subsequent Fourier syntheses, full-matrix least-squares on  $F_o^2$  (SHELX97), hydrogen atoms refined with a riding model, data / restraints / parameters = 4980 / 1 / 250,  $S(F^2) = 1.029$ ,  $R(F) = 0.0420$  and  $wR(F^2) = 0.1059$  on all data,  $R(F) = 0.0374$  and  $wR(F^2) = 0.11016$  for 4652 reflections with  $I > 2\sigma(I)$ , weighting scheme  $w = 1/[\sigma^2(F_o^2) + (0.0374P)^2 + 0.1375P]$  where  $P = (F_o^2 + 2F_c^2)/3$ , largest difference peak and hole 0.170 and  $-0.162$  e Å<sup>-3</sup>. Flack parameter = 0.1 (14). Crystallographic data (excluding structure factors) for the structure reported in this paper have been deposited with the Cambridge Crystallographic Data Centre as supplementary publication no. CCDC-XXXXXX. Copies of the data can be obtained free of charge on application to CCDC, 12 Union Road, Cambridge CB21EZ, UK (fax: (+44) 1223-336-033; e-mail: [deposit@ccdc.cam.ac.uk](mailto:deposit@ccdc.cam.ac.uk)).

fluorene-*o*-ketone-isopropile  
Inova600-Triple H1-s2pul-CDCl3 Apr 13 2007

Archive directory:  
Sample directory:

Pulse Sequence: s2pul

Solvent: CDCl3  
Temp. 25.0 C / 298.1 K  
File: fluorene-*o*-ketone-diisopropile-protone  
INOVA-300 'blade'

Relax. delay 2.000 sec  
Pulse 45.0 degrees  
Acq. time 2.995 sec  
Width 9611.9 Hz  
16 repetitions  
OBSERVE HL, 599.7347464 MHz  
DATA PROCESSING  
FT size 65536  
Total time 1 min, 20 sec

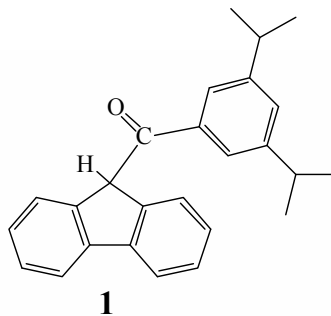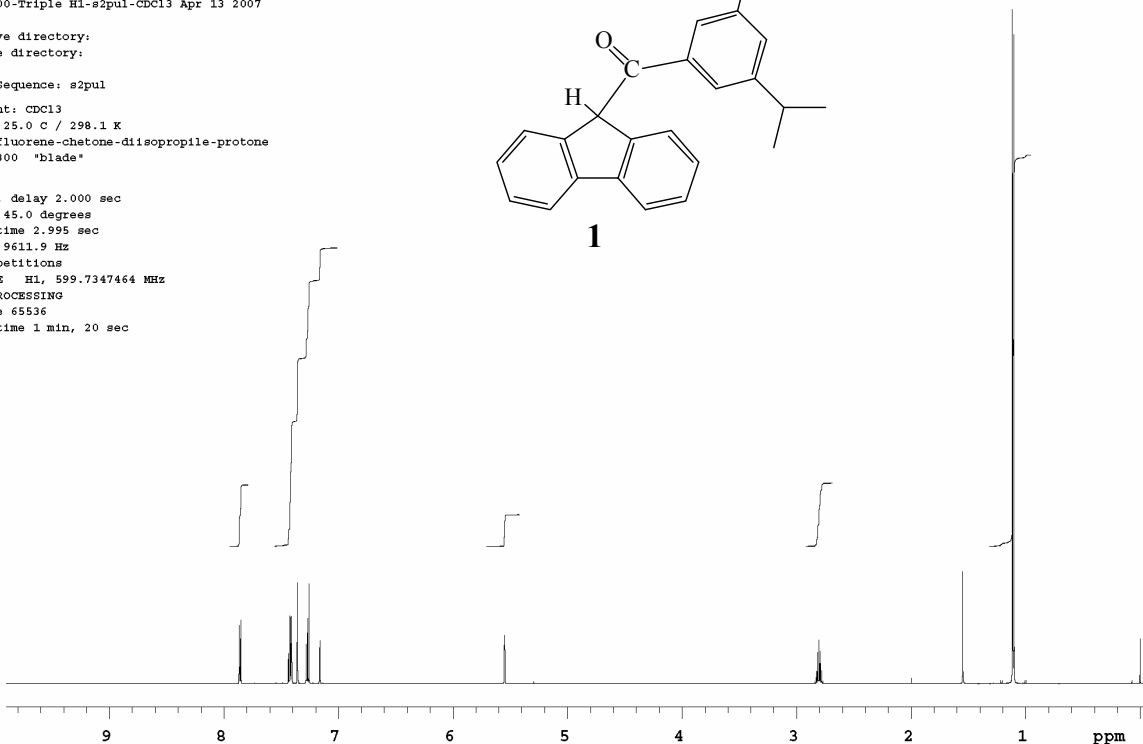

| INDEX | FREQUENCY | PPM     | HEIGHT |
|-------|-----------|---------|--------|
| 1     | 29937.377 | 198.519 | 10.2   |
| 2     | 22503.124 | 149.222 | 26.5   |
| 3     | 21568.202 | 143.022 | 18.2   |
| 4     | 21376.705 | 141.752 | 17.0   |
| 5     | 20555.176 | 136.304 | 7.2    |
| 6     | 19670.008 | 130.435 | 20.7   |
| 7     | 19325.198 | 128.148 | 49.1   |
| 8     | 19265.030 | 127.749 | 51.1   |
| 9     | 18912.698 | 125.413 | 51.7   |
| 10    | 18835.173 | 124.899 | 52.9   |
| 11    | 18184.893 | 120.587 | 49.8   |
| 12    | 11676.306 | 77.427  | 157.6  |
| 13    | 11644.486 | 77.216  | 162.0  |
| 14    | 11612.666 | 77.005  | 159.2  |
| 15    | 9035.844  | 59.918  | 17.4   |
| 16    | 5147.469  | 34.134  | 48.6   |
| 17    | 3611.443  | 23.948  | 110.9  |

CDCl3  
Inova 600  
Archive directory:  
Sample directory:  
Pulse Sequence: s2pul

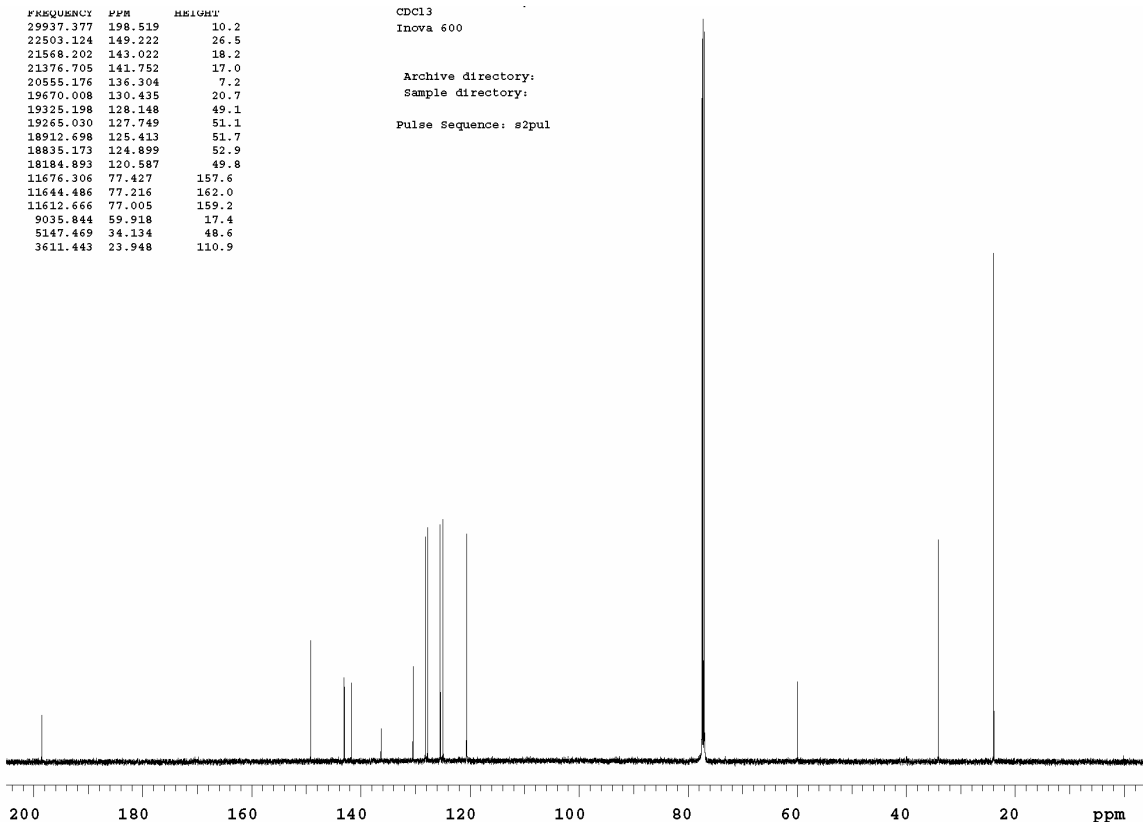

Fluorene 9Me CO-351Pr2Ph  
Inova600-Triple H1-s2pul-cd3cn May 14 2008

Archive directory:  
Sample directory:

Pulse Sequence: s2pul

Solvent: cd3cn  
Temp. 25.0 C / 298.1 K  
File: 9MeFL-CO-351pr2ph-protone-HPLC  
INOVA-300 'blade'

Pulse 45.0 degrees  
Acq. time 2.995 sec  
Width 9611.9 Hz  
4 repetitions  
OBSERVE H1, 599.7379258 MHz  
DATA PROCESSING  
FT size 131072  
Total time 0 min, 12 sec

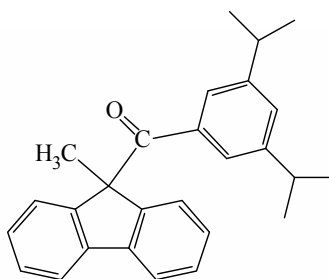

2

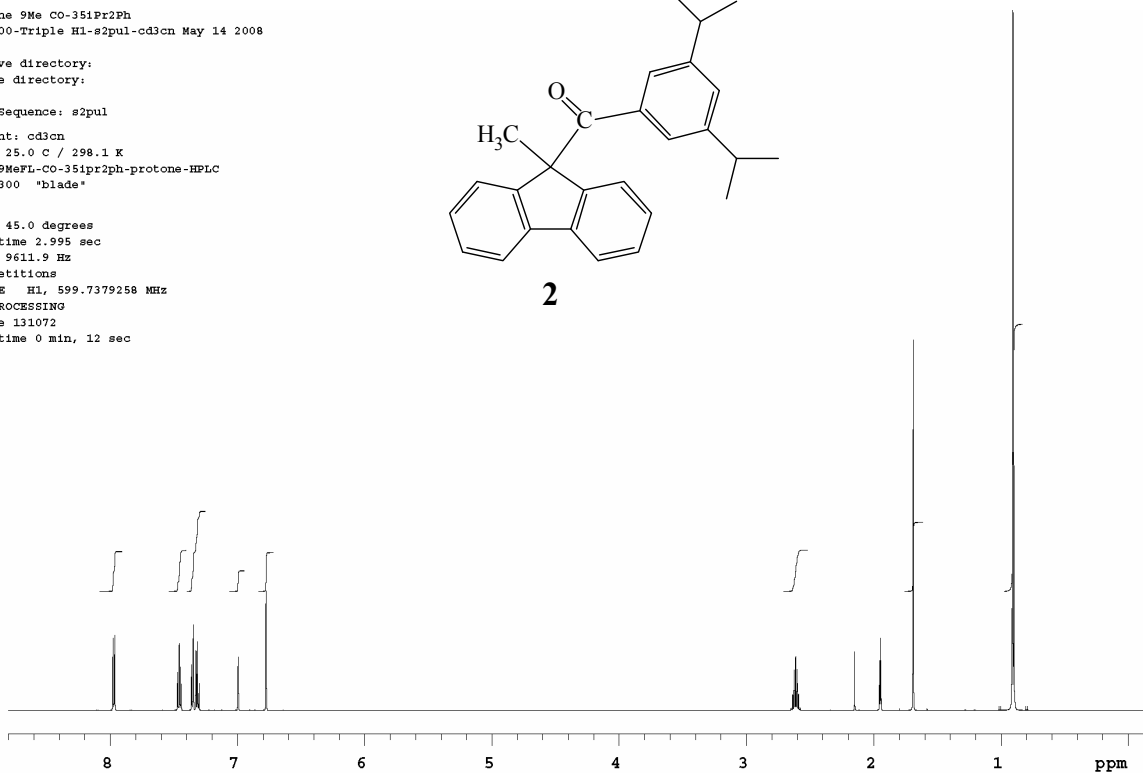

| INDEX | FREQUENCY | PPM     | HEIGHT |
|-------|-----------|---------|--------|
| 1     | 30361.952 | 201.334 | 6.9    |
| 2     | 22717.688 | 150.644 | 18.0   |
| 3     | 22605.451 | 149.900 | 20.8   |
| 4     | 21428.698 | 142.096 | 17.1   |
| 5     | 20802.138 | 137.942 | 8.9    |
| 6     | 19694.232 | 130.595 | 34.1   |
| 7     | 19547.283 | 129.620 | 57.5   |
| 8     | 19534.555 | 129.536 | 61.4   |
| 9     | 18875.018 | 125.163 | 60.9   |
| 10    | 18844.934 | 124.963 | 64.7   |
| 11    | 18458.468 | 122.400 | 62.4   |
| 12    | 17900.176 | 118.698 | 128.5  |
| 13    | 9692.413  | 64.272  | 7.7    |
| 14    | 5251.945  | 34.893  | 48.0   |
| 15    | 3825.428  | 25.367  | 34.3   |
| 16    | 3662.858  | 24.289  | 140.9  |
| 17    | 322.361   | 2.138   | 19.3   |
| 18    | 301.534   | 2.000   | 56.1   |
| 19    | 281.285   | 1.865   | 112.0  |
| 20    | 260.457   | 1.727   | 135.4  |
| 21    | 239.630   | 1.589   | 120.9  |
| 22    | 218.802   | 1.451   | 61.5   |
| 23    | 197.975   | 1.313   | 20.3   |

Inova600-Triple C13-s2pul  
cd3cn May 14 2008  
Archive directory:  
Sample directory:  
Pulse Sequence: s2pul

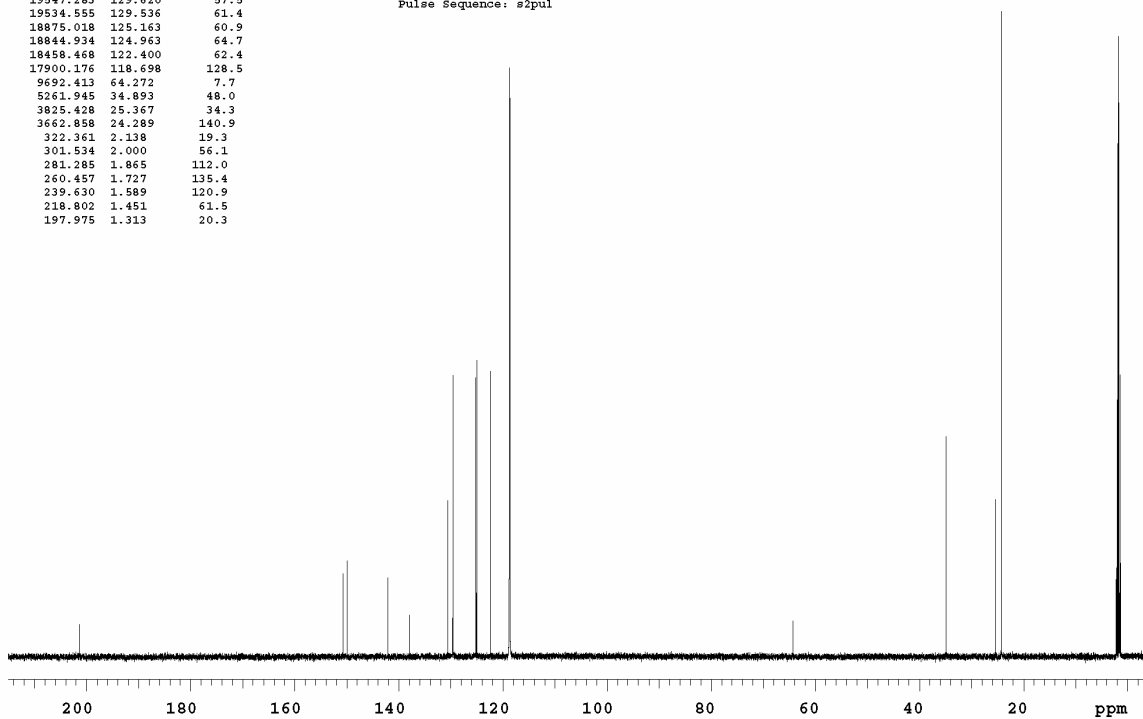



9-iPr-FL-CO-35-diiPrPh  
CDCl3  
Inova 600

Archive directory:  
Sample directory:

Pulse Sequence: s2pul

Solvent: CDCl3  
Temp. 25.0 C / 298.1 K  
File: 1H-9iPrFLCO-35diiPrPh  
INOVA-300 'blade'

Pulse 45.0 degrees  
Acq. time 2.995 sec  
Width 9611.9 Hz  
Single scan  
OBSERVE HL, 599.7347532 MHz  
DATA PROCESSING  
FT size 65536  
Total time 0 min, 9 sec

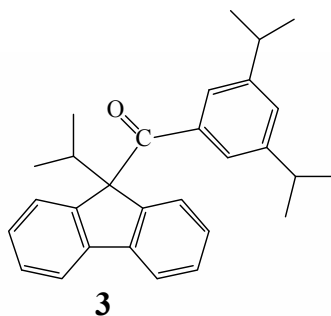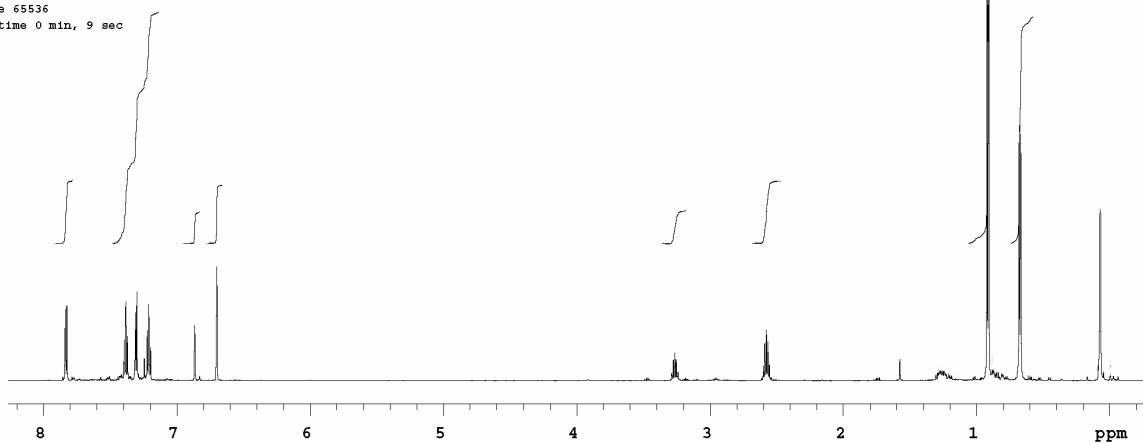

| INDEX | FREQUENCY | PPM     | HEIGHT |
|-------|-----------|---------|--------|
| 1     | 30515.340 | 202.352 | 10.3   |
| 2     | 22338.240 | 148.128 | 29.3   |
| 3     | 22116.659 | 146.659 | 24.7   |
| 4     | 21414.310 | 142.002 | 23.2   |
| 5     | 20803.949 | 137.954 | 11.1   |
| 6     | 19424.707 | 128.808 | 36.7   |
| 7     | 19306.684 | 128.026 | 66.2   |
| 8     | 19251.145 | 127.657 | 64.6   |
| 9     | 18938.154 | 125.582 | 65.8   |
| 10    | 18663.347 | 123.759 | 71.1   |
| 11    | 18139.767 | 120.288 | 67.7   |
| 12    | 11678.620 | 77.443  | 44.3   |
| 13    | 11646.222 | 77.228  | 43.8   |
| 14    | 11614.402 | 77.017  | 44.5   |
| 15    | 10767.996 | 71.404  | 9.5    |
| 16    | 5330.867  | 35.350  | 36.9   |
| 17    | 5120.856  | 33.957  | 65.0   |
| 18    | 3590.037  | 23.806  | 147.9  |
| 19    | 2754.045  | 18.262  | 74.5   |
| 20    | 187.058   | 1.240   | 53.3   |

CDCl3  
Inova 600  
Archive directory:  
Sample directory:  
Pulse Sequence: s2pul

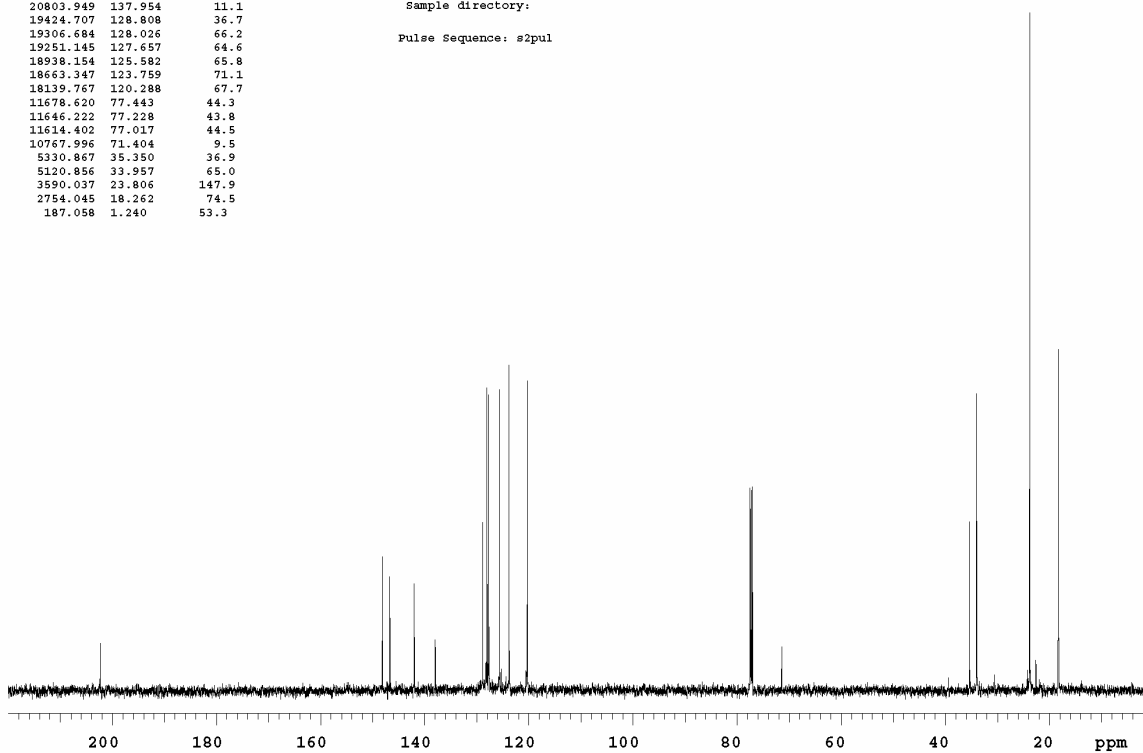

Fluorene 9Me-9CO-mesityl  
 Inova 600-Triple H1-s2pul  
 cd3cn Apr 15 2008

Archive directory:  
 Sample directory:

Pulse Sequence: s2pul

Solvent: cd3cn  
 Temp. 25.0 C / 298.1 K  
 File: 1H-9Me-FLCOMes  
 INOVA-300 "blade"

Pulse 30.0 degrees  
 Acq. time 2.995 sec  
 Width 9611.9 Hz  
 4 repetitions  
 OBSERVE H1, 599.7379258 MHz  
 DATA PROCESSING  
 FT size 131072  
 Total time 0 min, 12 sec

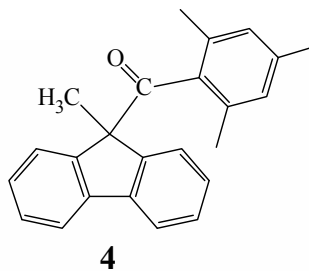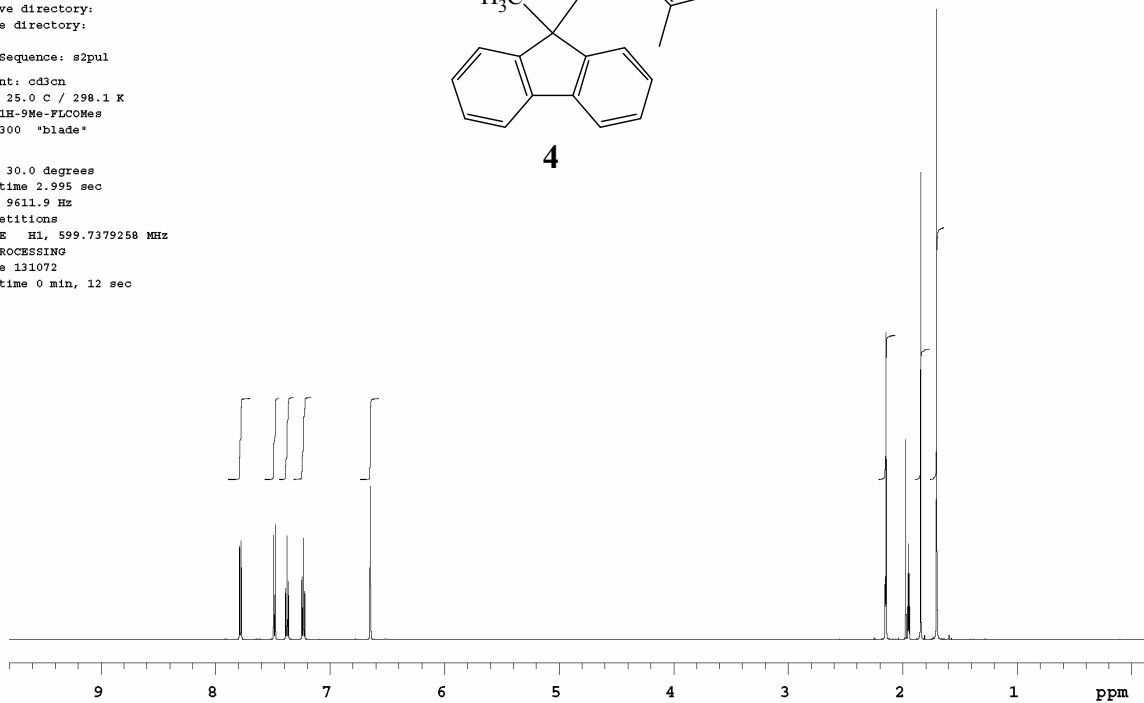

| INDEX | FREQUENCY | PPM     | HEIGHT |
|-------|-----------|---------|--------|
| 1     | 32146.625 | 213.168 | 8.3    |
| 2     | 22397.050 | 148.518 | 23.3   |
| 3     | 21339.477 | 141.505 | 23.0   |
| 4     | 21227.240 | 140.760 | 7.7    |
| 5     | 21010.865 | 139.326 | 14.3   |
| 6     | 20176.031 | 133.790 | 28.6   |
| 7     | 19510.130 | 129.374 | 80.9   |
| 8     | 19485.252 | 129.209 | 76.5   |
| 9     | 19429.134 | 128.837 | 79.3   |
| 10    | 19075.067 | 126.489 | 76.2   |
| 11    | 18296.929 | 121.329 | 73.2   |
| 12    | 17900.050 | 118.697 | 149.4  |
| 13    | 9878.577  | 65.506  | 11.8   |
| 14    | 4287.556  | 28.431  | 36.6   |
| 15    | 3220.148  | 21.353  | 21.6   |
| 16    | 3040.221  | 20.160  | 44.0   |
| 17    | 322.235   | 2.137   | 20.1   |
| 18    | 301.408   | 1.999   | 58.4   |
| 19    | 281.159   | 1.864   | 121.1  |
| 20    | 260.331   | 1.726   | 145.4  |
| 21    | 239.504   | 1.588   | 126.9  |
| 22    | 218.676   | 1.450   | 65.5   |
| 23    | 197.849   | 1.312   | 21.8   |

Inova600-Triple C13-s2pul  
 cd3cn Apr 15 2008

Archive directory:  
 Sample directory:

Pulse Sequence: s2pul

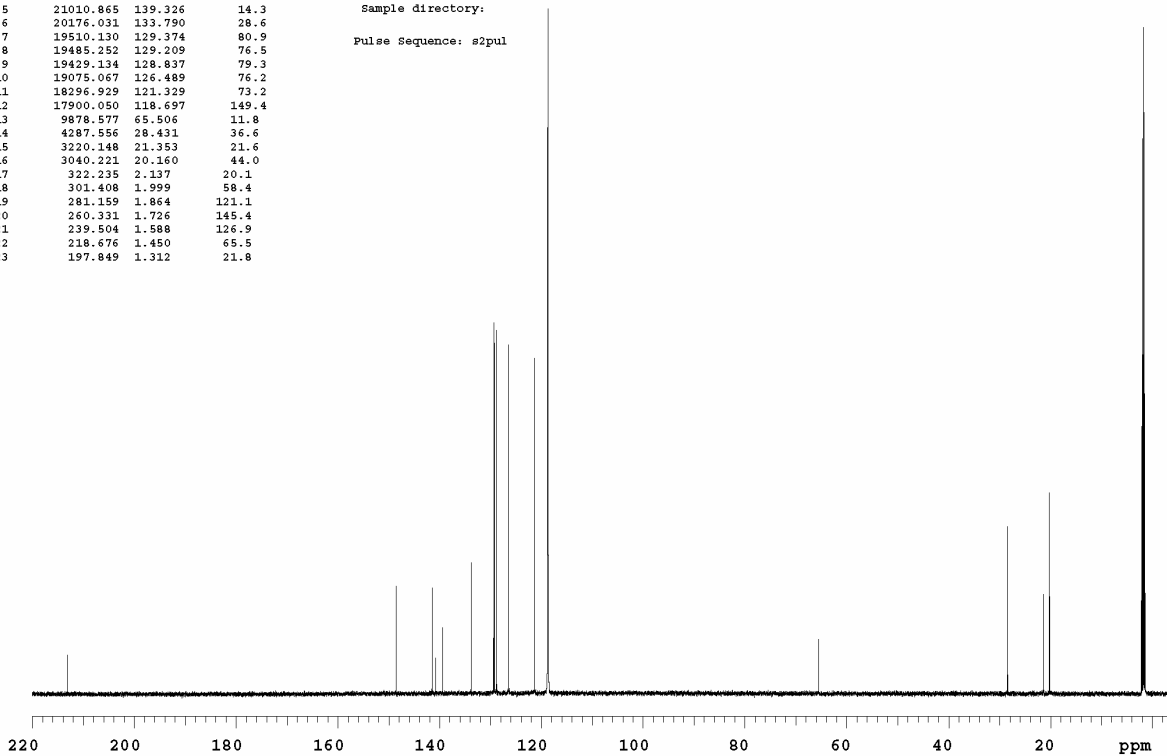

9-*i*Pr-FL-9-COMes  
 HPLC  
 CD3CN Inova 600  
 Archive directory:  
 Sample directory:  
 Pulse Sequence: s2pul  
 Solvent: cd3cn  
 Temp. 25.0 C / 298.1 K  
 File: 1H-9*i*pr-FLCOMes  
 INOVA-300 'blade'

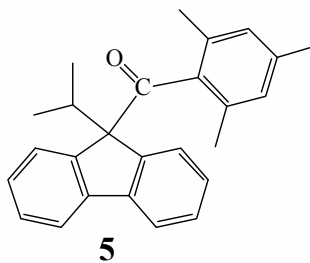

Pulse 45.0 degrees  
 Acq. time 2.995 sec  
 Width 9611.9 Hz  
 4 repetitions  
 OBSERVE HL, 599.7379258 MHz  
 DATA PROCESSING  
 FT size 65536  
 Total time 0 min, 12 sec

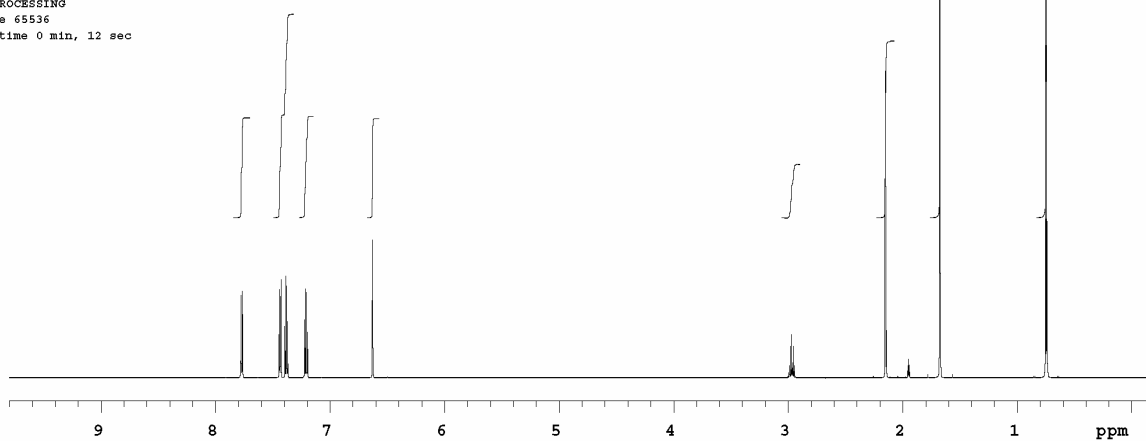

| INDEX | FREQUENCY | PPM     | HEIGHT | HPLC                  |
|-------|-----------|---------|--------|-----------------------|
| 1     | 31747.106 | 210.519 | 5.9    | CD3CN Inova 600       |
| 2     | 21823.390 | 144.713 | 15.5   |                       |
| 3     | 21372.706 | 141.725 | 15.1   |                       |
| 4     | 21070.129 | 139.718 | 7.3    | Archive directory:    |
| 5     | 20816.728 | 138.038 | 10.2   | Sample directory:     |
| 6     | 20076.196 | 133.128 | 16.9   |                       |
| 7     | 19336.242 | 128.221 | 53.0   |                       |
| 8     | 19310.786 | 128.052 | 53.5   | Pulse Sequence: s2pul |
| 9     | 19181.771 | 127.197 | 55.1   |                       |
| 10    | 19079.948 | 126.521 | 50.6   |                       |
| 11    | 18054.773 | 119.723 | 54.3   |                       |
| 12    | 17723.269 | 117.525 | 162.3  |                       |
| 13    | 10968.802 | 72.735  | 5.2    |                       |
| 14    | 5502.745  | 36.489  | 26.4   |                       |
| 15    | 3035.846  | 20.131  | 15.5   |                       |
| 16    | 2854.762  | 18.930  | 34.5   |                       |
| 17    | 2692.192  | 17.852  | 55.1   |                       |
| 18    | 145.454   | 0.965   | 25.0   |                       |
| 19    | 124.627   | 0.826   | 72.3   |                       |
| 20    | 103.759   | 0.688   | 138.7  |                       |
| 21    | 82.972    | 0.550   | 157.1  |                       |
| 22    | 62.723    | 0.416   | 128.4  |                       |
| 23    | 41.896    | 0.278   | 66.7   |                       |
| 24    | 21.068    | 0.140   | 23.4   |                       |

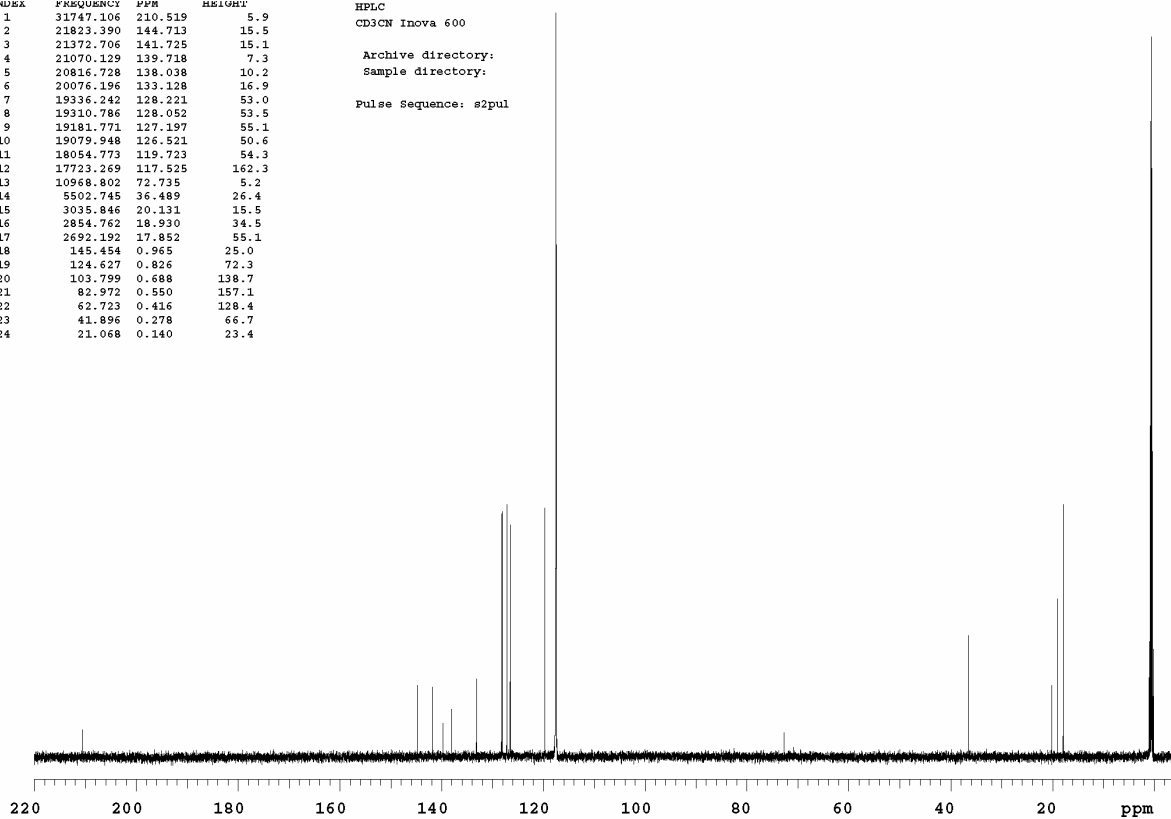

Fluorene-9-(CH(OH)-3,5-iPr2Ph)  
 CDCl3  
 Inova600

Archive directory:  
 Sample directory:

Pulse Sequence: s2pul

Solvent: CDCl3  
 Temp. 25.0 C / 298.1 K  
 File: 1H-9FLCHOH-35PhiPr2  
 INOVA-300 'blade'

Pulse 45.0 degrees  
 Acq. time 2.995 sec  
 Width 9611.9 Hz  
 4 repetitions  
 OBSERVE HL, 599.7347494 MHz  
 DATA PROCESSING  
 FT size 65536  
 Total time 0 min, 18 sec

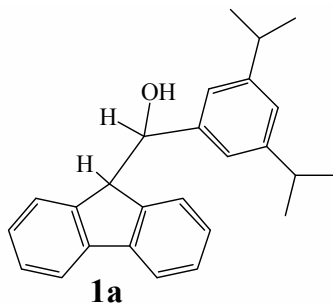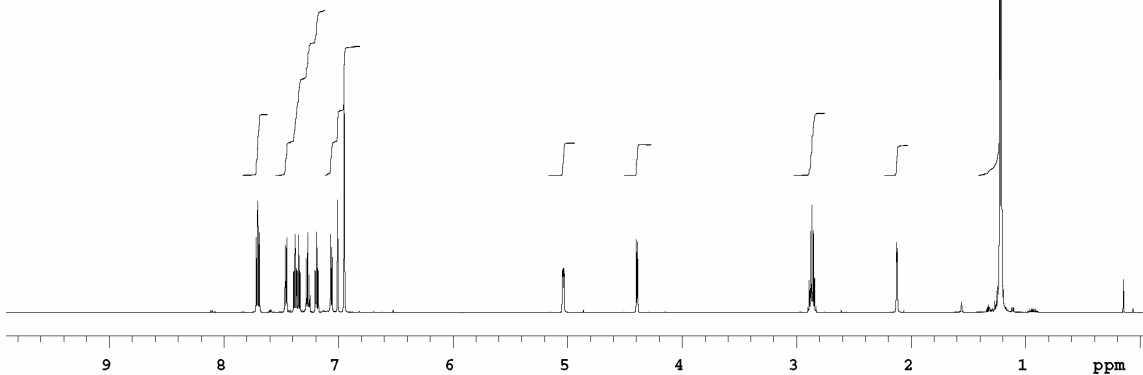

| INDEX | FREQUENCY | PPM     | HEIGHT |
|-------|-----------|---------|--------|
| 1     | 22402.728 | 148.556 | 42.9   |
| 2     | 21708.478 | 143.952 | 21.0   |
| 3     | 21616.490 | 143.342 | 19.6   |
| 4     | 21384.495 | 141.804 | 18.3   |
| 5     | 21360.775 | 141.646 | 36.0   |
| 6     | 19213.809 | 127.410 | 44.4   |
| 7     | 19206.288 | 127.360 | 49.0   |
| 8     | 19070.909 | 126.462 | 48.7   |
| 9     | 19066.281 | 126.431 | 47.3   |
| 10    | 19044.296 | 126.286 | 48.5   |
| 11    | 18977.186 | 125.841 | 43.7   |
| 12    | 18741.719 | 124.279 | 46.0   |
| 13    | 18434.524 | 122.242 | 90.5   |
| 14    | 18042.263 | 119.641 | 48.4   |
| 15    | 18023.171 | 119.514 | 48.2   |
| 16    | 11643.020 | 77.207  | 38.6   |
| 17    | 11611.200 | 76.996  | 39.3   |
| 18    | 11589.794 | 76.854  | 53.6   |
| 19    | 11579.380 | 76.785  | 38.8   |
| 20    | 8278.803  | 54.898  | 53.1   |
| 21    | 5146.003  | 34.124  | 97.3   |
| 22    | 3622.126  | 24.019  | 109.1  |
| 23    | 3615.762  | 23.977  | 112.9  |

CDCl3  
 Inova 600  
 Archive directory:  
 Sample directory:  
 Pulse Sequence: s2pul

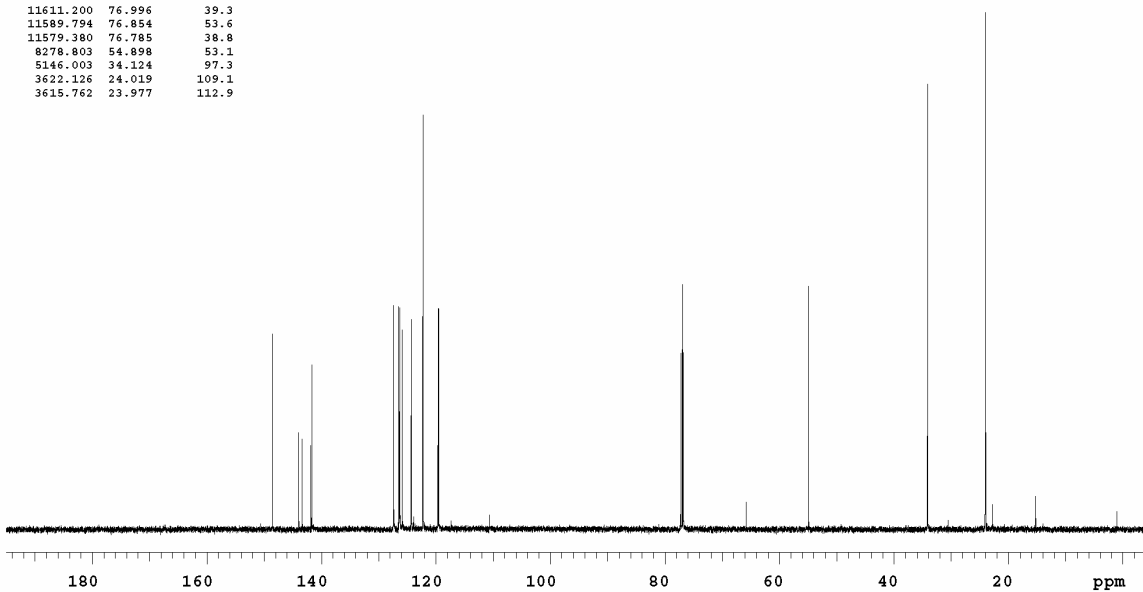

9-Me-FL-CHOH-Ph35di1Pr  
 CDCl3 Inova 600  
 Archive directory:  
 Sample directory:  
 Pulse Sequence: s2pul  
 Solvent: CDCl3  
 Temp: 25.0 c / 298.1 K  
 File: 1H-9Me-FL-CHOH-Ph351Pr  
 INOVA-300 "blade"

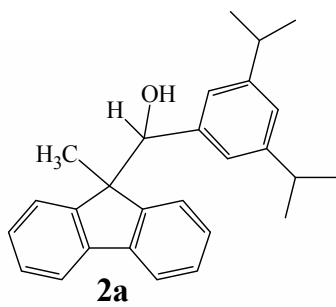

Pulse 29.0 degrees  
 Acq. time 3.000 sec  
 Width 9595.8 Hz  
 4 repetitions  
 OBSERVE H1, 599.7347567 MHz  
 DATA PROCESSING  
 Resol. enhancement 0.6 Hz  
 Gauss apodization 0.700 sec  
 FT size 65536  
 Total time 0 min, 18 sec

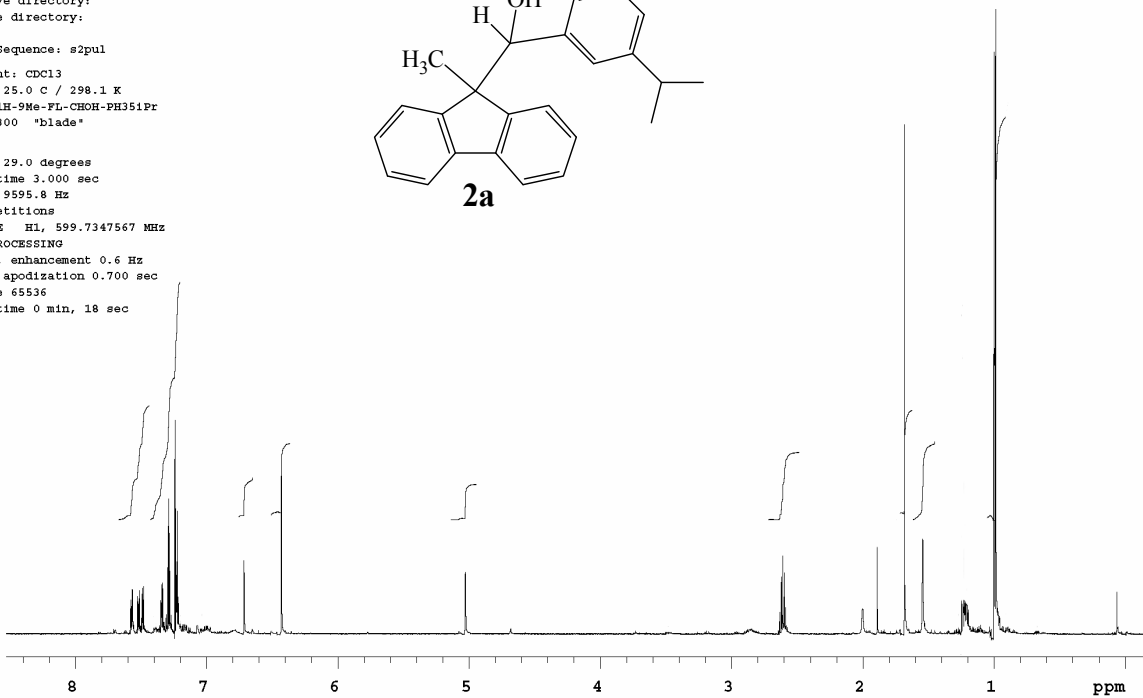

| INDEX | FREQUENCY | PPM     | HEIGHT |
|-------|-----------|---------|--------|
| 1     | 22501.969 | 149.214 | 13.8   |
| 2     | 22401.881 | 148.550 | 13.8   |
| 3     | 22201.128 | 147.219 | 43.9   |
| 4     | 21239.592 | 140.843 | 16.4   |
| 5     | 21193.309 | 140.536 | 16.9   |
| 6     | 21085.122 | 139.819 | 18.0   |
| 7     | 19204.863 | 127.350 | 54.4   |
| 8     | 19186.928 | 127.231 | 49.2   |
| 9     | 19103.618 | 126.679 | 50.6   |
| 10    | 19066.592 | 126.433 | 52.5   |
| 11    | 18866.995 | 125.110 | 45.8   |
| 12    | 18757.651 | 124.385 | 47.1   |
| 13    | 18711.368 | 124.078 | 55.7   |
| 14    | 18503.093 | 122.697 | 94.6   |
| 15    | 18040.260 | 119.628 | 53.8   |
| 16    | 18023.482 | 119.516 | 51.2   |
| 17    | 12194.680 | 80.865  | 40.7   |
| 18    | 11643.331 | 77.209  | 83.8   |
| 19    | 11611.511 | 76.998  | 86.7   |
| 20    | 11579.113 | 76.783  | 86.8   |
| 21    | 8415.650  | 55.805  | 17.0   |
| 22    | 5115.651  | 33.923  | 81.1   |
| 23    | 3601.609  | 23.883  | 116.3  |
| 24    | 3590.617  | 23.810  | 120.5  |
| 25    | 3235.971  | 21.458  | 50.6   |

CDCl3 Inova 600  
 Archive directory:  
 Sample directory:  
 Pulse Sequence: s2pul

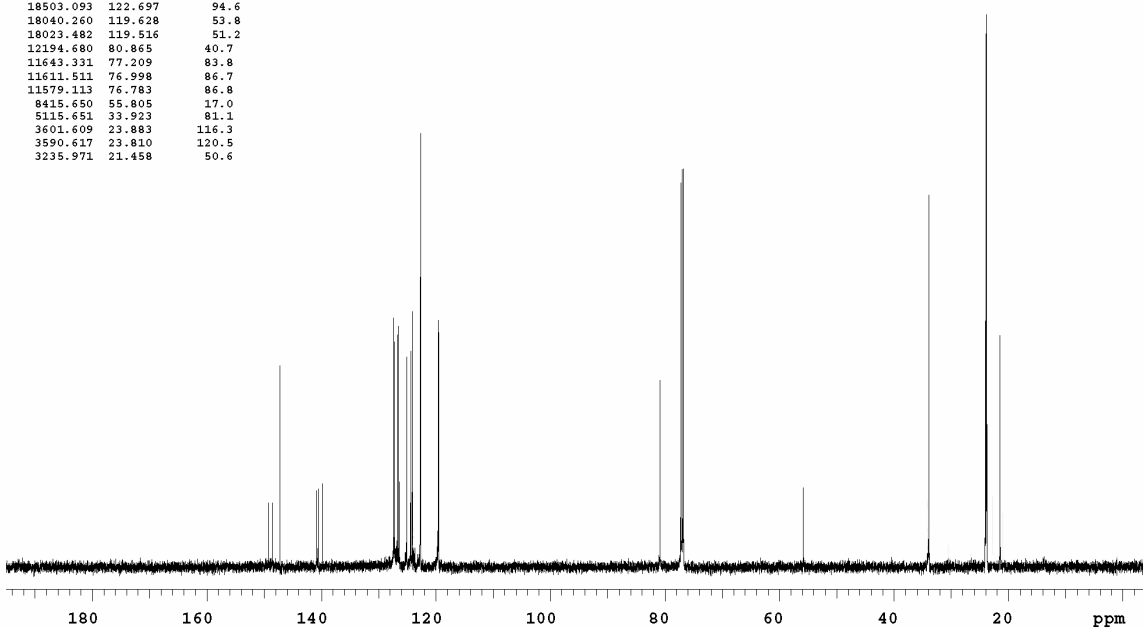

9-iPr-FL-CHOH-35-diPrPh  
CDCl3  
Inova 600

Archive directory:  
Sample directory:

Pulse Sequence: s2pul  
Solvent: CDCl3  
Temp. 25.0 C / 298.1 K  
File: 1H-9iPrFL-CHOH-35diPrPh  
INNOVA-300 'blade'

Pulse 45.0 degrees  
Acq. time 2.995 sec  
Width 9611.9 Hz  
4 repetitions  
OBSERVE H1, 599.7347532 MHz  
DATA PROCESSING  
FT size 65536  
Total time 0 min, 18 sec

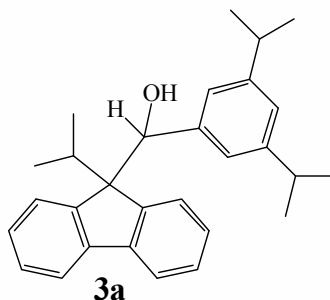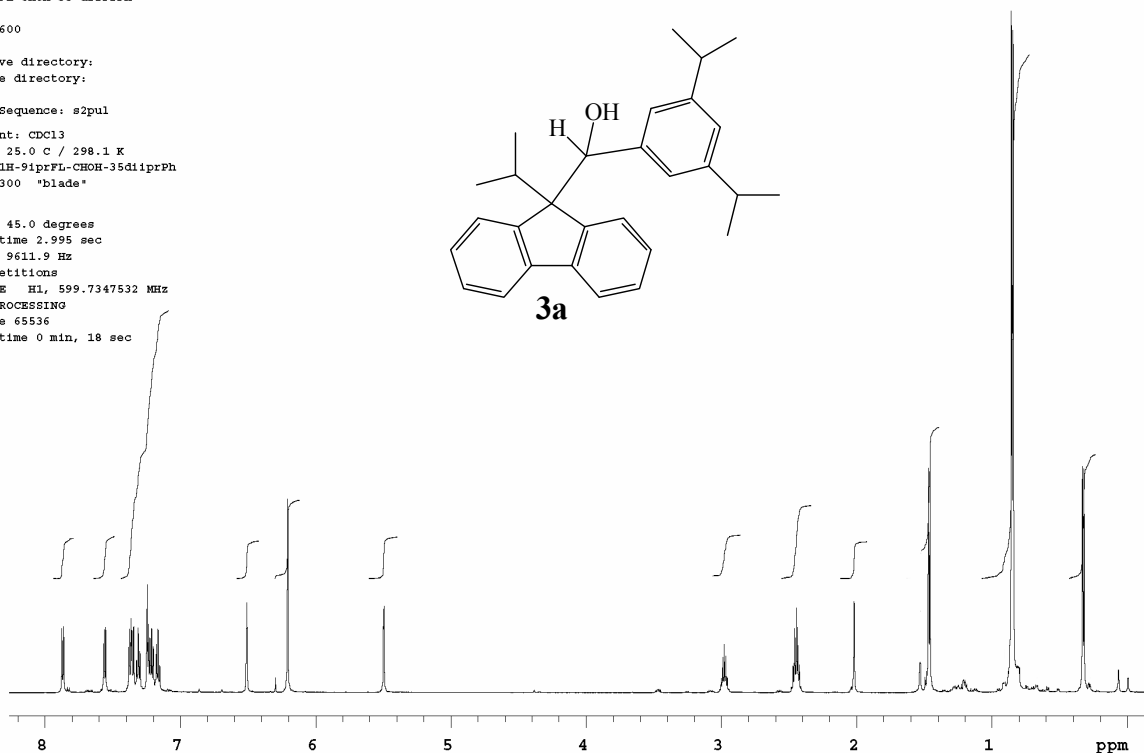

| INDEX | FREQUENCY | PPM     | HEIGHT |
|-------|-----------|---------|--------|
| 1     | 22302.370 | 147.890 | 12.1   |
| 2     | 22161.206 | 146.954 | 29.5   |
| 3     | 22013.678 | 145.976 | 9.1    |
| 4     | 21457.700 | 142.289 | 12.4   |
| 5     | 21377.862 | 141.760 | 9.6    |
| 6     | 21152.066 | 140.329 | 16.6   |
| 7     | 19181.141 | 127.193 | 53.3   |
| 8     | 19114.030 | 126.748 | 38.7   |
| 9     | 19017.992 | 126.111 | 39.7   |
| 10    | 18979.809 | 125.858 | 36.6   |
| 11    | 18958.981 | 125.720 | 39.6   |
| 12    | 18688.224 | 123.924 | 36.9   |
| 13    | 18505.984 | 122.716 | 75.3   |
| 14    | 18047.200 | 119.674 | 39.1   |
| 15    | 17981.825 | 119.240 | 39.3   |
| 16    | 11719.696 | 77.715  | 40.2   |
| 17    | 11678.041 | 77.439  | 103.8  |
| 18    | 11645.643 | 77.224  | 106.0  |
| 19    | 11613.823 | 77.013  | 105.9  |
| 20    | 9569.838  | 63.459  | 13.8   |
| 21    | 5127.799  | 34.003  | 71.8   |
| 22    | 4887.126  | 32.407  | 41.0   |
| 23    | 3621.278  | 24.013  | 99.2   |
| 24    | 3617.228  | 23.986  | 96.9   |
| 25    | 2805.535  | 18.604  | 42.7   |
| 26    | 2734.953  | 18.136  | 44.5   |

CDCl3  
Inova 600  
Archive directory:  
Sample directory:  
Pulse Sequence: s2pul

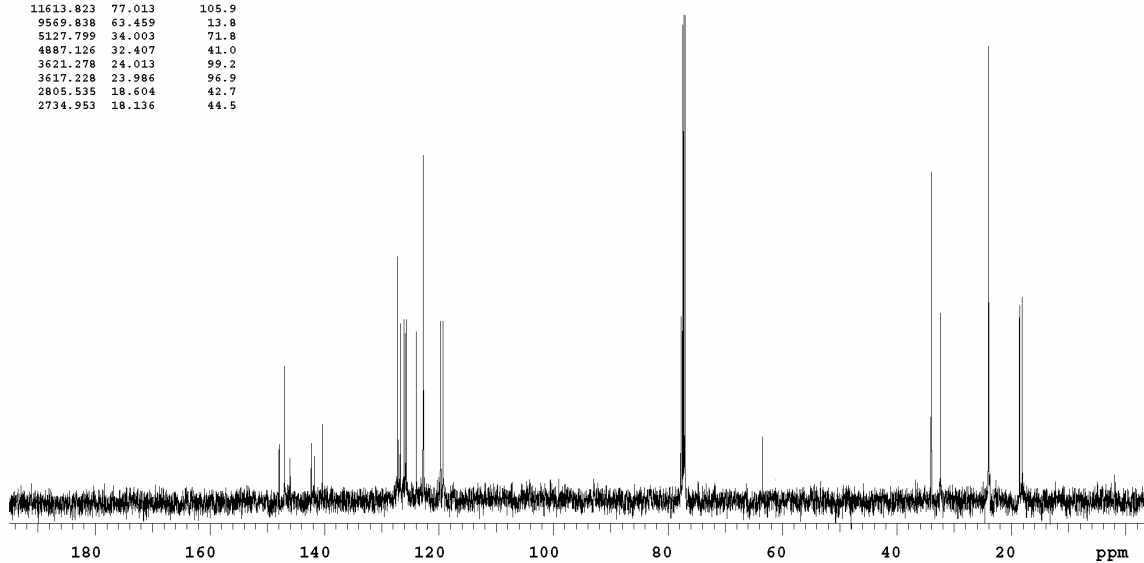

9-Me-FL-CHOH-Mes HPLC  
CDCl3 Inova 600 triple

Archive directory:  
Sample directory:

Pulse Sequence: s2pul

Solvent: CDCl3  
Temp. 25.0 c / 298.1 K  
File: 1H-9Me-FLCHOHMe-HPLC  
INOVA-300 "blade"

Pulse 45.0 degrees  
Acq. time 3.000 sec  
Width 9595.8 Hz  
4 repetitions  
OBSERVE H1, 599.7347532 MHz  
DATA PROCESSING  
FT size 65536  
Total time 0 min, 18 sec

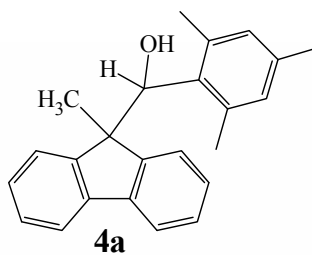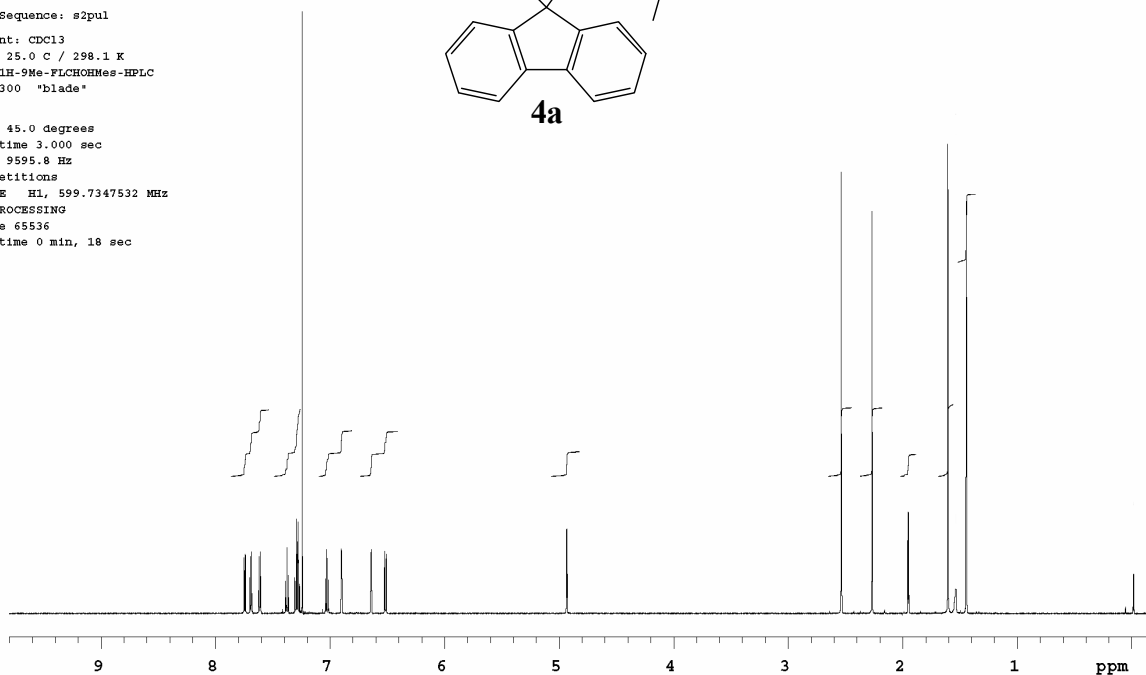

| INDEX | FREQUENCY | PPM     | HEIGHT |                        |
|-------|-----------|---------|--------|------------------------|
| 1     | 22954.386 | 152.214 | 9.5    | CDCl3 Inova 600 triple |
| 2     | 22494.446 | 149.164 | 8.4    | Archive directory:     |
| 3     | 21231.491 | 140.789 | 7.8    | Sample directory:      |
| 4     | 21084.541 | 139.815 | 8.1    |                        |
| 5     | 20845.604 | 138.230 | 12.8   |                        |
| 6     | 20638.486 | 136.857 | 10.3   |                        |
| 7     | 20152.512 | 133.634 | 8.0    | Pulse Sequence: s2pul  |
| 8     | 19884.647 | 131.858 | 24.7   |                        |
| 9     | 19469.833 | 129.107 | 23.5   |                        |
| 10    | 19249.409 | 127.646 | 29.3   |                        |
| 11    | 19242.466 | 127.600 | 25.5   |                        |
| 12    | 19170.149 | 127.120 | 23.5   |                        |
| 13    | 19140.065 | 126.921 | 24.2   |                        |
| 14    | 18916.169 | 125.436 | 25.1   |                        |
| 15    | 18850.216 | 124.999 | 24.9   |                        |
| 16    | 18116.047 | 120.130 | 24.9   |                        |
| 17    | 18060.507 | 119.762 | 23.2   |                        |
| 18    | 11676.306 | 77.427  | 477.6  |                        |
| 19    | 11644.486 | 77.216  | 478.2  |                        |
| 20    | 11612.088 | 77.002  | 480.9  |                        |
| 21    | 11538.613 | 76.514  | 27.8   |                        |
| 22    | 8674.256  | 57.520  | 10.9   |                        |
| 23    | 3421.103  | 22.686  | 16.0   |                        |
| 24    | 3196.050  | 21.193  | 18.3   |                        |
| 25    | 3159.602  | 20.952  | 14.0   |                        |
| 26    | 3082.077  | 20.438  | 26.5   |                        |

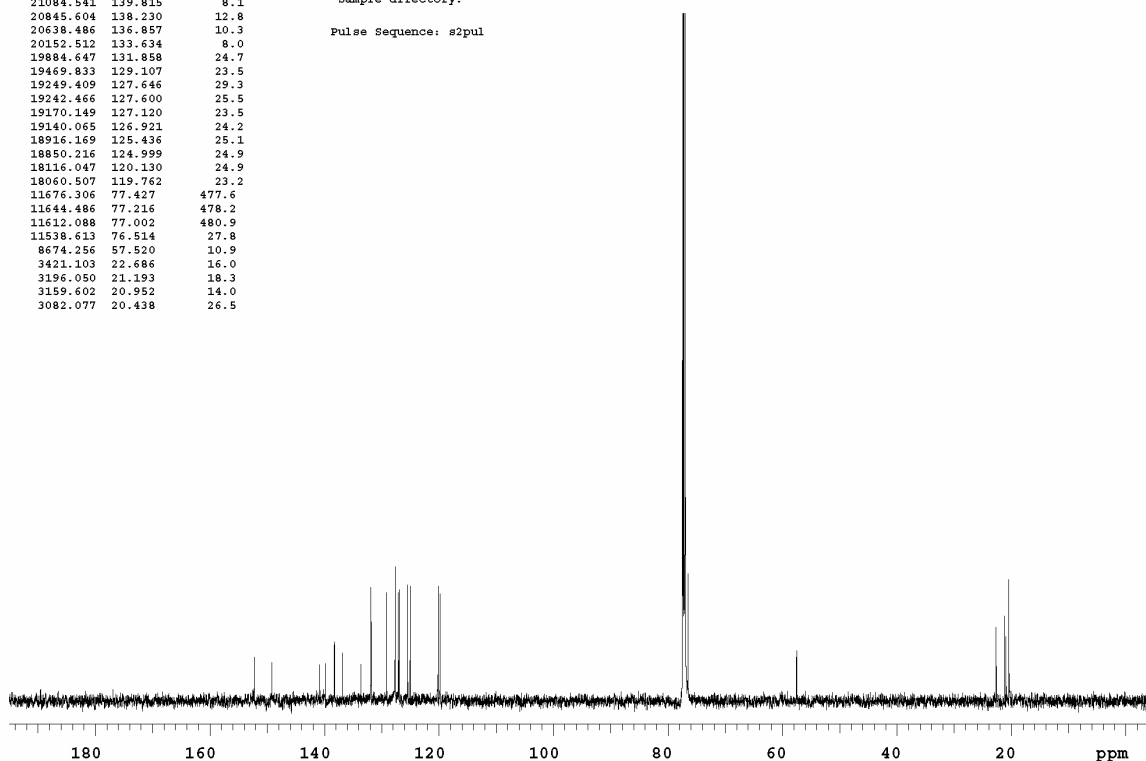

9-1Pr-FL-CHOH-Mes  
 CDCl3  
 Inova 600  
 Archive directory:  
 Sample directory:  
 Pulse Sequence: s2pul  
 Solvent: CDCl3  
 Temp. 25.0 C / 298.1 K  
 File: 1H-91Pr-FL-CHOH-Mes  
 INOVA-300 "blade"

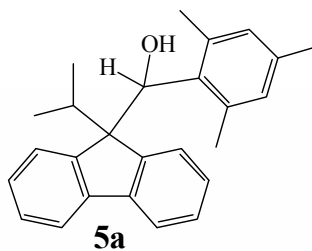

Pulse 29.0 degrees  
 Acq. time 3.000 sec  
 Width 9595.8 Hz  
 4 repetitions  
 OBSERVE HL, 599.7347532 MHz  
 DATA PROCESSING  
 FT size 65536  
 Total time 0 min, 18 sec

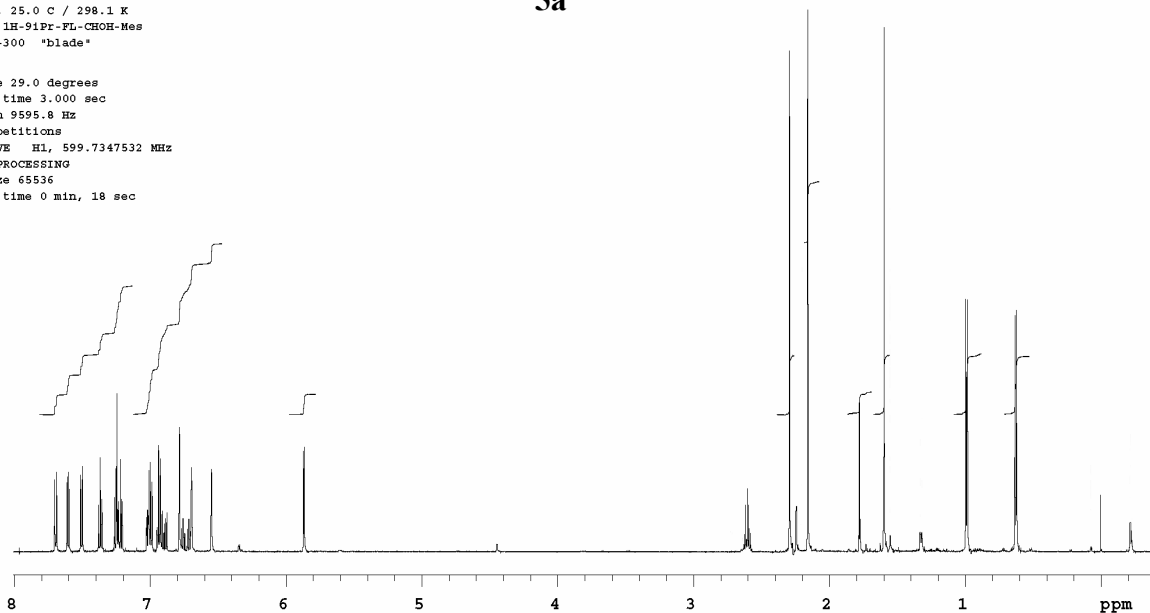

| INDEX | FREQUENCY | PPM     | HEIGHT |
|-------|-----------|---------|--------|
| 1     | 22331.878 | 148.086 | 30.4   |
| 2     | 22331.878 | 148.086 | 30.4   |
| 3     | 21475.059 | 142.404 | 29.1   |
| 4     | 21276.040 | 141.085 | 32.4   |
| 5     | 20863.541 | 138.349 | 31.6   |
| 6     | 20564.435 | 136.366 | 49.2   |
| 7     | 20379.880 | 135.142 | 32.2   |
| 8     | 19797.868 | 131.283 | 77.4   |
| 9     | 19425.866 | 128.816 | 98.4   |
| 10    | 19213.541 | 127.408 | 88.9   |
| 11    | 19209.492 | 127.381 | 105.5  |
| 12    | 19116.346 | 126.763 | 93.8   |
| 13    | 19049.814 | 126.322 | 97.0   |
| 14    | 19019.730 | 126.123 | 88.2   |
| 15    | 18971.133 | 125.800 | 99.8   |
| 16    | 18040.260 | 119.628 | 87.3   |
| 17    | 17957.364 | 119.144 | 98.3   |
| 18    | 11645.066 | 77.220  | 90.6   |
| 19    | 11613.247 | 77.009  | 92.8   |
| 20    | 11580.848 | 76.794  | 91.4   |
| 21    | 11326.290 | 75.106  | 77.0   |
| 22    | 9714.475  | 64.418  | 27.0   |
| 23    | 5283.428  | 35.035  | 73.9   |
| 24    | 3315.810  | 21.988  | 52.7   |
| 25    | 3170.596  | 21.025  | 50.4   |
| 26    | 3108.114  | 20.610  | 67.7   |
| 27    | 2958.850  | 19.621  | 112.2  |
| 28    | 2854.713  | 18.930  | 90.3   |

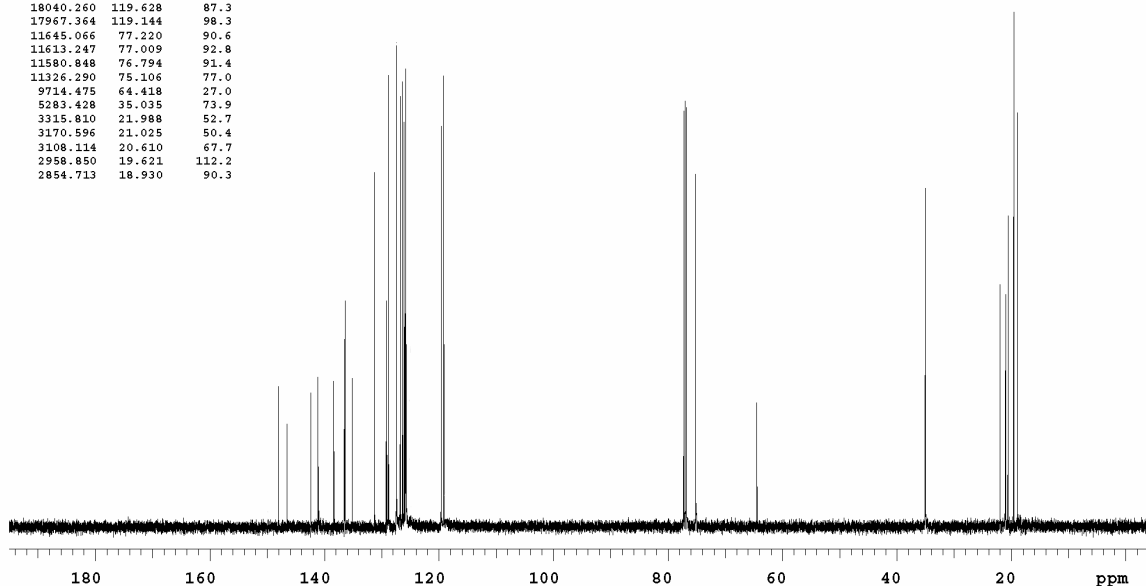



grezzo 9-Me-9-CH2OH-Fluorene  
Inova 600 CDCl3

Archive directory:  
Sample directory:

Pulse Sequence: s2pul  
Solvent: CDCl3  
Temp. 25.0 C / 298.1 K  
File: 1H-9-Me-9CH2OH-FL  
INOVA-300 'blade'

Pulse 45.0 degrees  
Acq. time 2.995 sec  
Width 9611.9 Hz  
4 repetitions  
OBSERVE HL, 599.7347553 MHz  
DATA PROCESSING  
FT size 65536  
Total time 0 min, 18 sec

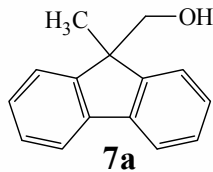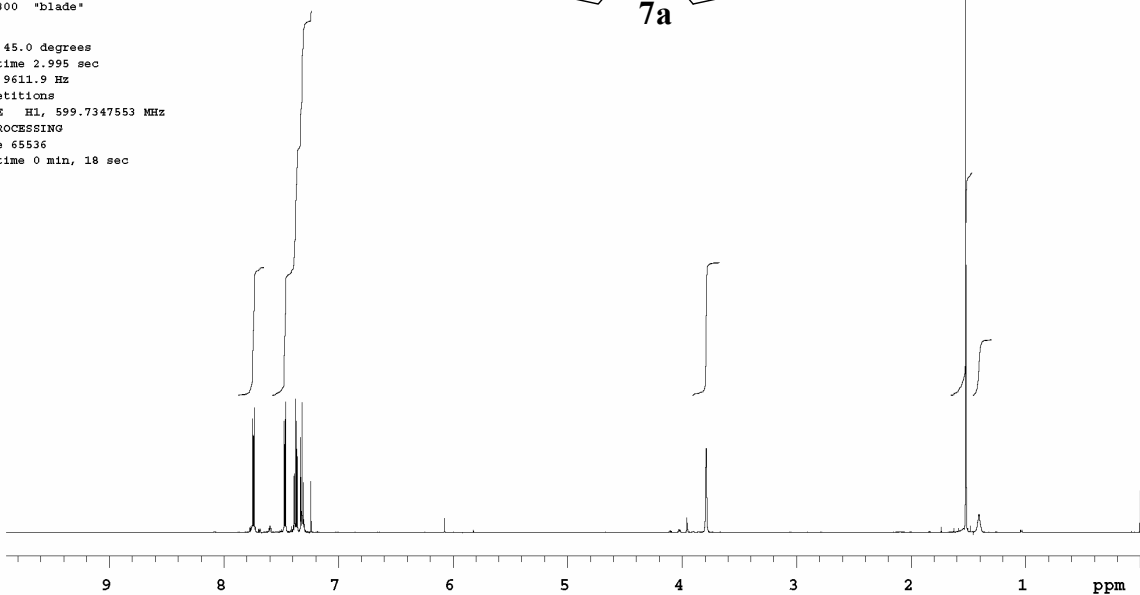

| INDEX | FREQUENCY | PPM     | HEIGHT |
|-------|-----------|---------|--------|
| 1     | 22514.775 | 149.299 | 28.4   |
| 2     | 21170.246 | 140.383 | 28.7   |
| 3     | 19236.761 | 127.562 | 88.2   |
| 4     | 19193.949 | 127.278 | 89.6   |
| 5     | 18577.224 | 123.188 | 84.7   |
| 6     | 18110.920 | 120.096 | 88.8   |
| 7     | 11636.467 | 77.163  | 59.1   |
| 8     | 11604.647 | 76.952  | 61.0   |
| 9     | 11572.827 | 76.741  | 58.8   |
| 10    | 10544.760 | 69.924  | 57.3   |
| 11    | 7923.390  | 52.541  | 14.0   |
| 12    | 3154.475  | 20.918  | 61.3   |

Inova 600 CDCl3  
Archive directory:  
Sample directory:  
Pulse Sequence: s2pul

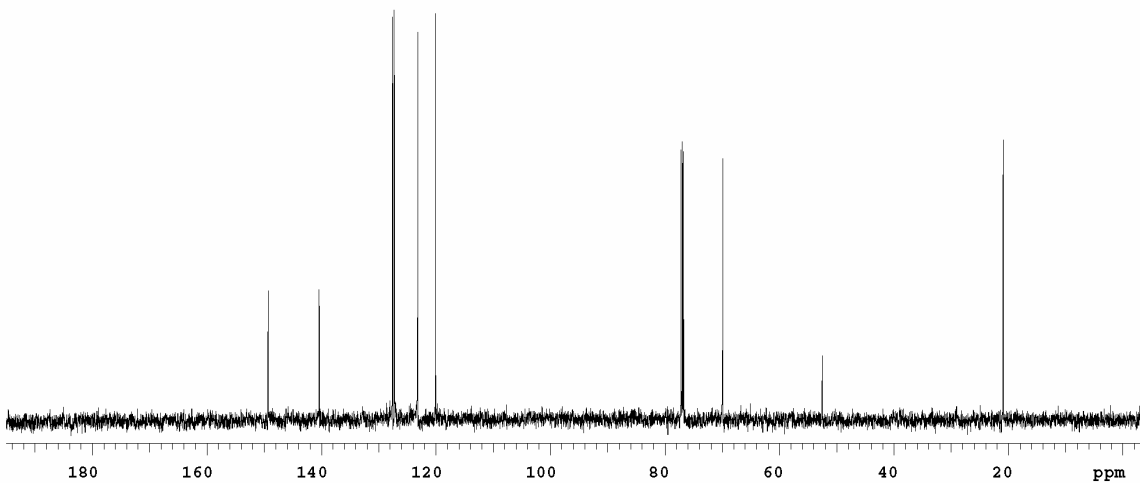

9Me-Fluorene-9CHO  
 CDCl3  
 Inova 600  
 Archive directory:  
 Sample directory:  
 Pulse Sequence: s2pul  
 Solvent: CDCl3  
 Temp. 25.0 C / 298.1 K  
 File: 1H-9Me-FLCHO  
 INOVA-300 'blade'

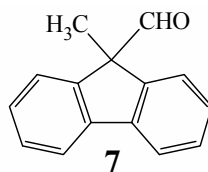

Pulse 45.0 degrees  
 Acq. time 3.000 sec  
 Width 9595.8 Hz  
 Single scan  
 OBSERVE HL, 599.7347546 MHz  
 DATA PROCESSING  
 FT size 65536  
 Total time 0 min, 9 sec

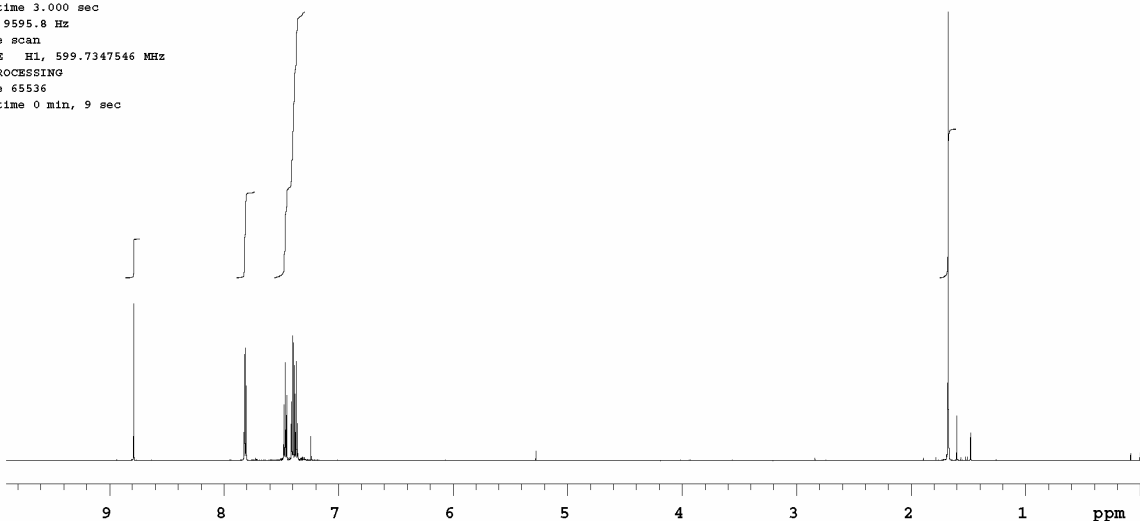

| INDEX | FREQUENCY | PPM     | HEIGHT |                       |
|-------|-----------|---------|--------|-----------------------|
| 1     | 29749.930 | 197.276 | 29.0   | CDCl3                 |
| 2     | 21739.450 | 144.158 | 25.7   | Inova 600             |
| 3     | 21422.988 | 142.059 | 23.0   |                       |
| 4     | 19456.527 | 129.019 | 78.9   | Archive directory:    |
| 5     | 19330.983 | 128.187 | 84.1   | Sample directory:     |
| 6     | 18842.116 | 124.945 | 79.8   |                       |
| 7     | 18193.571 | 120.644 | 80.1   | Pulse Sequence: s2pul |
| 8     | 11683.827 | 77.477  | 23.7   |                       |
| 9     | 11652.007 | 77.266  | 24.0   |                       |
| 10    | 11620.187 | 77.055  | 23.5   |                       |
| 11    | 9551.903  | 63.340  | 8.8    |                       |
| 12    | 2581.639  | 17.119  | 49.1   |                       |

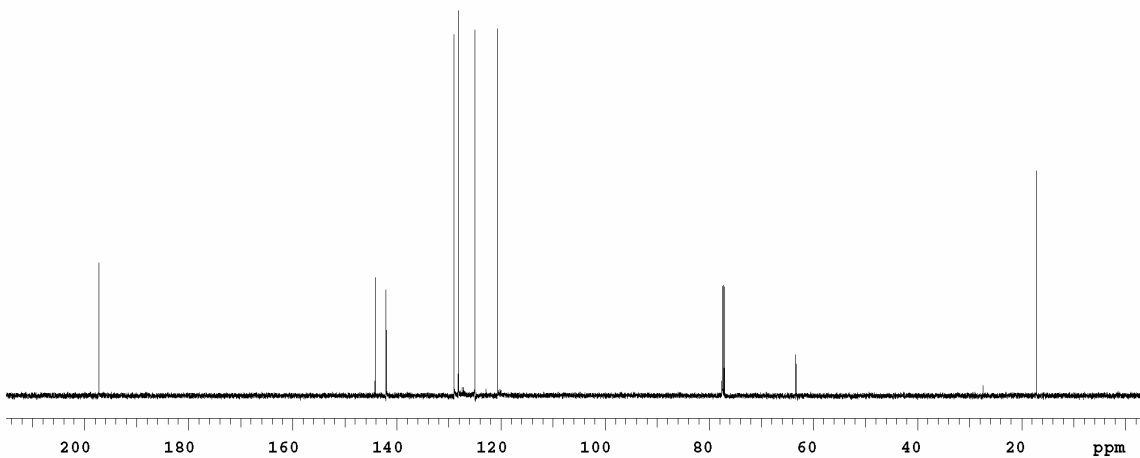

Reported by User: System

Project Name: LunaC18

## SAMPLE INFORMATION

|                   |                          |                   |                      |
|-------------------|--------------------------|-------------------|----------------------|
| Sample Name:      | 9H-fluo-CO-35ipr2ph-anal | Acquired By:      | System               |
| Vial:             | 4                        | Date Acquired:    | 5/28/2008 1:02:38 PM |
| Injection #:      | 1                        | Flow (ml / min) : | 5.0                  |
| Injection Volume: | 100.00 ul                | Solvent 1:        | <b>ACN</b> 90.0 %    |
| Run Time:         | 25.0 Minutes             | Solvent 2:        | <b>Water</b> 10.0 %  |
| Acq. Method Set:  | azeo_0_5                 | Column:           | Luna C18             |
| Compound Name:    | compound 1               | Channel Name:     | 2487Channel 1        |

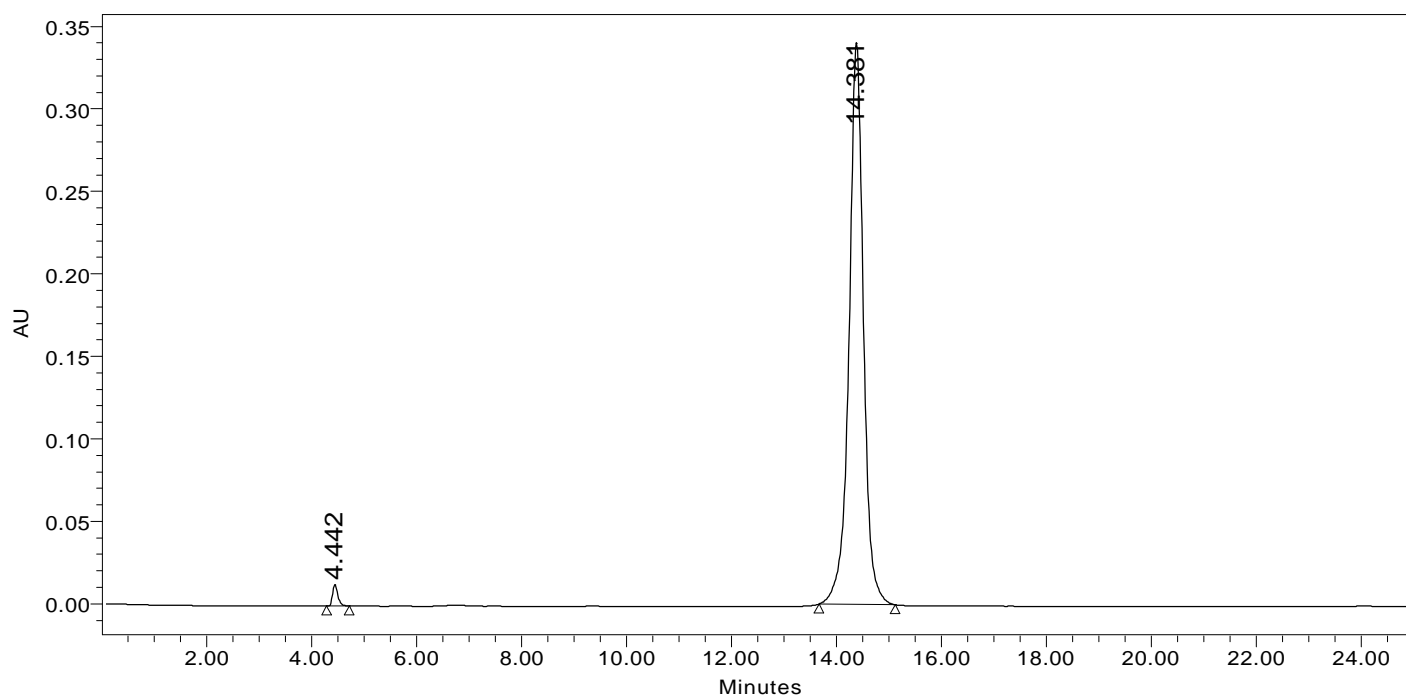

|   | RT     | Area    | % Area | Height |
|---|--------|---------|--------|--------|
| 1 | 4.442  | 90953   | 1.38   | 13173  |
| 2 | 14.381 | 6499332 | 98.62  | 340480 |

Reported by User: System

Project Name: LunaC18

## SAMPLE INFORMATION

|                   |                             |                   |                      |
|-------------------|-----------------------------|-------------------|----------------------|
| Sample Name:      | fluorene-CO-9Me-35ipr2-anal | Acquired By:      | System               |
| Vial:             | 7                           | Date Acquired:    | 5/14/2008 9:28:06 AM |
| Injection #:      | 1                           | Flow (ml / min) : | 5.0                  |
| Injection Volume: | 100.00 ul                   | Solvent 1:        | <b>ACN</b> 90.0 %    |
| Run Time:         | 25.0 Minutes                | Solvent 2:        | <b>Water</b> 10.0 %  |
| Acq. Method Set:  | azeo_0_5                    | Column:           | Luna C18             |
| Compound Name:    | Compound 2                  | Channel Name:     | 2487Channel 1        |

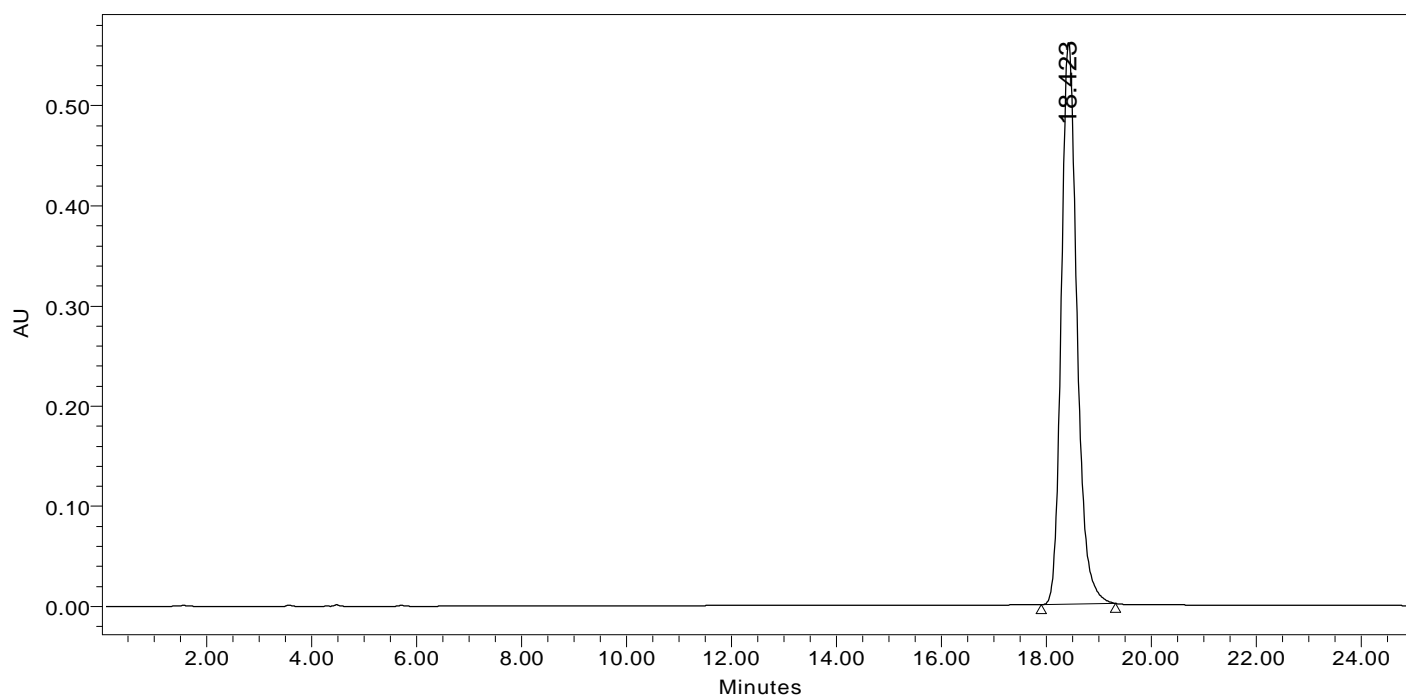

|   | RT     | Area     | % Area | Height |
|---|--------|----------|--------|--------|
| 1 | 18.423 | 11697428 | 100.00 | 561290 |

Reported by User: System

Project Name: LunaC8

## SAMPLE INFORMATION

|                   |                                |                   |                       |
|-------------------|--------------------------------|-------------------|-----------------------|
| Sample Name:      | fluorene-9ipr-CO-35ipr2PH-anal | Acquired By:      | System                |
| Vial:             | 2                              | Date Acquired:    | 5/14/2008 12:35:17 PM |
| Injection #:      | 1                              | Flow (ml / min) : | 5.0                   |
| Injection Volume: | 100.00 ul                      | Solvent 1:        | <b>ACN</b> 90.0 %     |
| Run Time:         | 30.0 Minutes                   | Solvent 2:        | <b>Water</b> 10.0 %   |
| Acq. Method Set:  | azeo_0_5                       | Column:           | Luna C8               |
| Compound Name:    | compound 3                     | Channel Name:     | 2487Channel 1         |

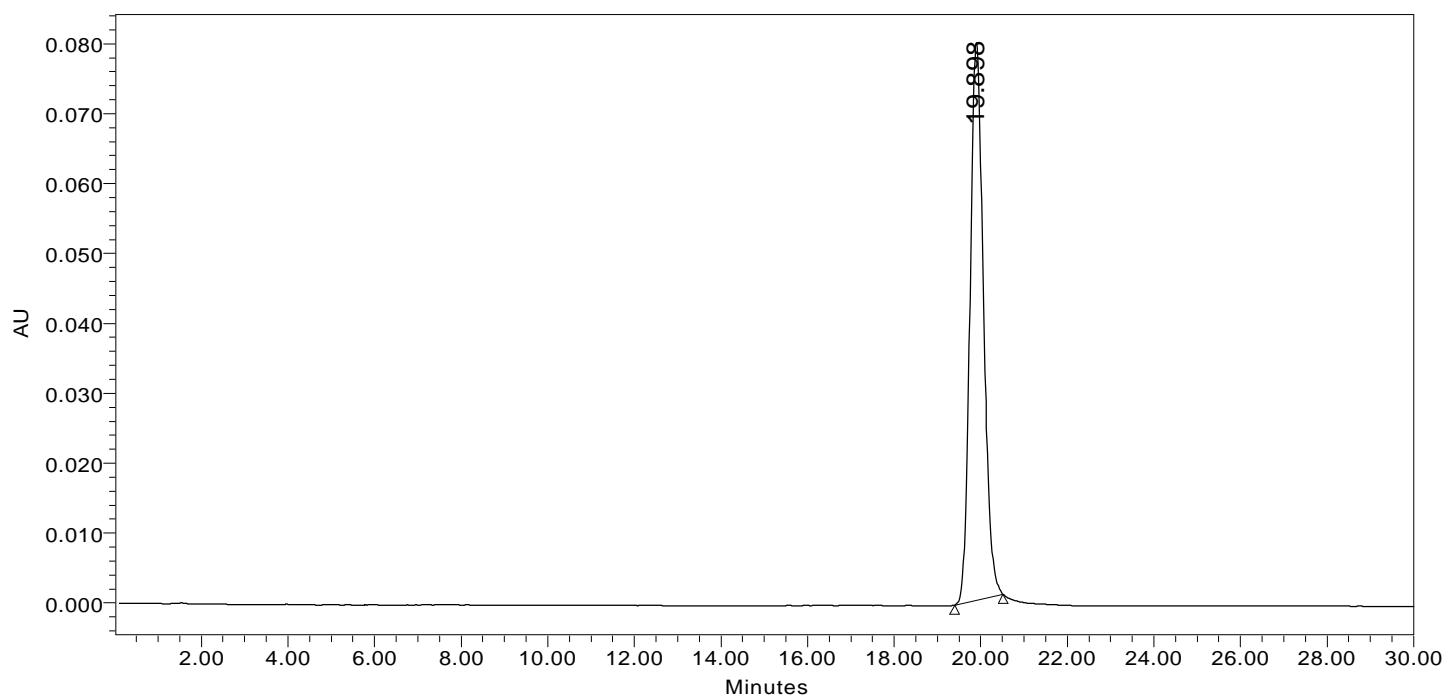

|   | RT     | Area    | % Area | Height |
|---|--------|---------|--------|--------|
| 1 | 19.898 | 1717934 | 100.00 | 79795  |

Reported by User: System

Project Name: LunaC18

## SAMPLE INFORMATION

|                   |                          |                   |                      |
|-------------------|--------------------------|-------------------|----------------------|
| Sample Name:      | fluorene-CO-9me-mes-anal | Acquired By:      | System               |
| Vial:             | 6                        | Date Acquired:    | 4/15/2008 2:30:59 PM |
| Injection #:      | 1                        | Flow (ml / min) : | 5.0                  |
| Injection Volume: | 100.00 ul                | Solvent 1:        | <b>ACN</b> 90.0 %    |
| Run Time:         | 20.0 Minutes             | Solvent 2:        | <b>Water</b> 10.0 %  |
| Acq. Method Set:  | azeo_0_5                 | Column:           | Luna C18             |
| Compound Name:    | compound 4               | Channel Name:     | 2487Channel 1        |

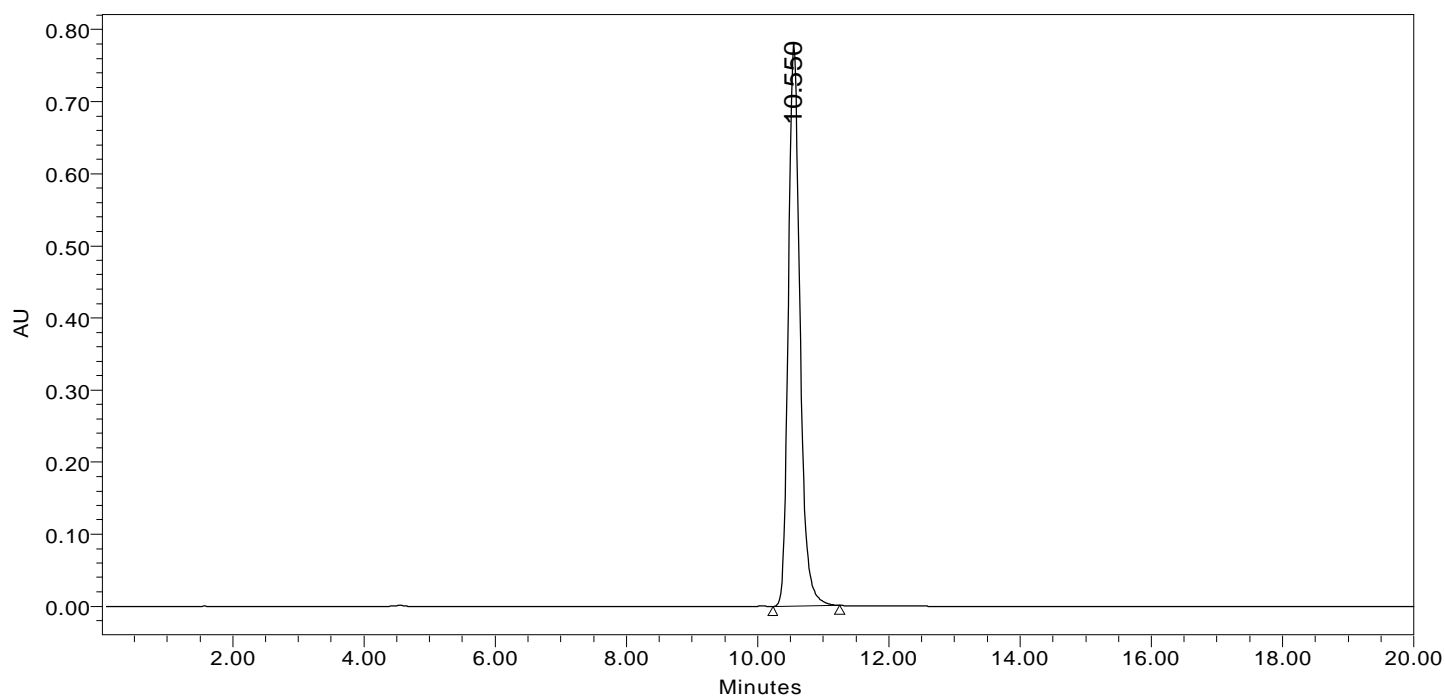

|   | RT     | Area    | % Area | Height |
|---|--------|---------|--------|--------|
| 1 | 10.550 | 9595503 | 100.00 | 781032 |

Reported by User: System

Project Name: LunaC18

SAMPLE INFORMATION

|                   |                          |                   |                      |
|-------------------|--------------------------|-------------------|----------------------|
| Sample Name:      | 9ipr-flo-comesitile-anal | Acquired By:      | System               |
| Vial:             | 4                        | Date Acquired:    | 6/12/2008 1:50:46 PM |
| Injection #:      | 1                        | Flow (ml / min) : | 5.0                  |
| Injection Volume: | 100.00 ul                | Solvent 1:        | <b>ACN</b> 90.0 %    |
| Run Time:         | 30.0 Minutes             | Solvent 2:        | <b>Water</b> 10.0 %  |
| Acq. Method Set:  | azeo_0_5                 | Column:           | Luna C18             |
| Compound Name:    | compound 5               | Channel Name:     | 2487Channel 1        |

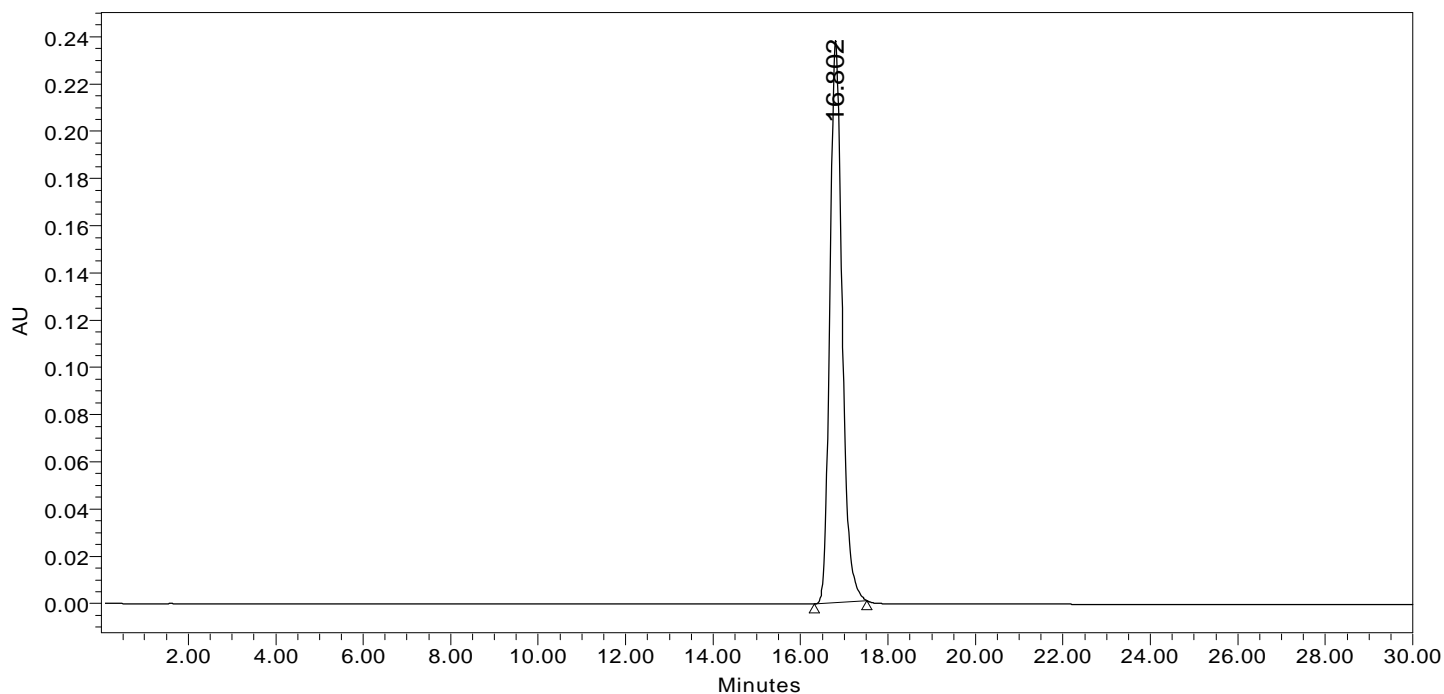

|   | RT     | Area    | % Area | Height |
|---|--------|---------|--------|--------|
| 1 | 16.802 | 4640718 | 100.00 | 238105 |

# COMPUTATIONAL SECTION

## Compound 1 Chemical shift calculations (only aliphatic signals are tabulated)

<sup>1</sup>H chemical Shift indicated in Figure 1 are moved upfield by 0.35 ppm

| Compound 1 - syn<br>B3LYP/6-311++G(2d,p) |              |             |                   |                   | Compound 1 - anti<br>B3LYP/6-311++G(2d,p) |              |                   |                   |                   |
|------------------------------------------|--------------|-------------|-------------------|-------------------|-------------------------------------------|--------------|-------------------|-------------------|-------------------|
|                                          | Abs. Shield. | C.S. vs TMS | mean value        |                   |                                           | Abs. Shield. | C.S. vs TMS       | mean value        |                   |
| C                                        | 112,36       | 70,10       | <b>70,10</b>      | C9                | C                                         | 122,07       | 60,39             | <b>60,39</b>      | C9                |
| H                                        | 26,40        | 5,42        | <b>5,42</b>       | H9                | H                                         | 25,64        | 6,18              | <b>6,18</b>       | H9                |
| C                                        | 139,91       | 42,54       | <b>42,21</b>      | CH                | C                                         | 139,39       | 43,07             | <b>43,07</b>      | CH <sub>a</sub>   |
| C                                        | 140,58       | 41,88       |                   |                   | H                                         | 28,89        | 2,93              |                   |                   |
| H                                        | 29,21        | 2,61        | <b>2,46</b>       | CH                | C                                         | 140,01       | 42,44             | <b>42,44</b>      | CH <sub>b</sub>   |
| H                                        | 29,50        | 2,32        |                   |                   | H                                         | 29,00        | 2,82              |                   |                   |
| C                                        | 156,14       | 26,32       | <b>17,08</b>      | Me                | C                                         | 156,41       | 26,05             | <b>26,34</b>      | Me <sub>a</sub>   |
| C                                        | 156,60       | 25,86       |                   |                   | C                                         | 155,83       | 26,63             |                   |                   |
| C                                        | 157,21       | 25,25       |                   |                   | H                                         | 30,50        | 1,32              |                   |                   |
| C                                        | 156,69       | 25,77       |                   |                   | H                                         | 30,49        | 1,33              |                   |                   |
| H                                        | 30,54        | 1,28        | <b>0,99</b>       | Me <sub>a-1</sub> | H                                         | 30,50        | 1,32              | <b>1,39</b>       | Me <sub>a-1</sub> |
| H                                        | 30,54        | 1,28        |                   |                   | H                                         | 30,50        | 1,32              |                   |                   |
| H                                        | 30,72        | 1,10        |                   |                   | H                                         | 30,34        | 1,48              |                   |                   |
| H                                        | 30,44        | 1,38        |                   | H                 | 30,35                                     | 1,47         | Me <sub>a-2</sub> |                   |                   |
| H                                        | 30,69        | 1,13        |                   | H                 | 30,38                                     | 1,44         |                   |                   |                   |
| H                                        | 30,69        | 1,13        |                   | C                 | 156,25                                    | 26,21        |                   |                   |                   |
| H                                        | 31,65        | 0,17        |                   | Me <sub>b-1</sub> | C                                         | 156,42       | 26,04             | <b>26,12</b>      | Me <sub>b</sub>   |
| H                                        | 31,07        | 0,75        |                   |                   | H                                         | 30,52        | 1,30              |                   |                   |
| H                                        | 31,24        | 0,58        |                   |                   | H                                         | 30,59        | 1,23              |                   |                   |
| H                                        | 31,22        | 0,60        |                   |                   | H                                         | 30,63        | 1,19              |                   |                   |
| H                                        | 31,07        | 0,75        |                   |                   | H                                         | 30,60        | 1,22              |                   |                   |
| H                                        | 31,53        | 0,29        |                   |                   | H                                         | 30,56        | 1,26              |                   |                   |
| H                                        |              |             | Me <sub>b-2</sub> | H                 | 30,46                                     | 1,36         | <b>1,26</b>       | Me <sub>b-2</sub> |                   |
| H                                        |              |             |                   | H                 |                                           |              |                   |                   |                   |



**Compound 4 Chemical shift calculations**  
 (only aliphatic signals are tabulated)

<sup>1</sup>H chemical Shift indicated in Figure 5 are moved upfield by 0.46 ppm

Compound 4  
 B3LYP/6-311++G(2d,p)

|   | Abs. Shield. | C.S. vs TMS | mean value   |           |
|---|--------------|-------------|--------------|-----------|
| C | 110,82       | 71,64       | <b>71,64</b> | C9        |
| C | 148,27       | 34,19       | <b>34,19</b> | Me-9      |
| H | 29,12        | 2,70        | <b>1,82</b>  |           |
| H | 29,84        | 1,98        |              |           |
| H | 31,04        | 0,78        |              |           |
| C | 159,41       | 23,05       | <b>23,05</b> | Me-ortho  |
| H | 29,34        | 2,48        | <b>2,49</b>  |           |
| H | 28,77        | 3,05        |              |           |
| H | 29,87        | 1,95        |              |           |
| C | 161,45       | 21,01       | <b>21,01</b> | Me-ortho' |
| H | 30,88        | 0,93        | <b>1,02</b>  |           |
| H | 30,82        | 1,00        |              |           |
| H | 30,70        | 1,12        |              |           |
| C | 159,68       | 22,78       | <b>22,78</b> | Me-para   |
| H | 29,43        | 2,39        | <b>2,16</b>  |           |
| H | 29,69        | 2,13        |              |           |
| H | 29,87        | 1,95        |              |           |

**Compound 5 Chemical shift calculations**  
(only aliphatic signals are tabulated)

<sup>1</sup>H chemical Shift indicated in Figure 6 are moved upfield by 0.27 ppm

| Compound 5 - syn (cis)<br>B3LYP/6-311++G(2d,p) |              |             |              |                    | Compound 5 - syn (trans)<br>B3LYP/6-311++G(2d,p) |              |             |              |                    |
|------------------------------------------------|--------------|-------------|--------------|--------------------|--------------------------------------------------|--------------|-------------|--------------|--------------------|
|                                                | Abs. Shield. | C.S. vs TMS | mean value   |                    |                                                  | Abs. Shield. | C.S. vs TMS | mean value   |                    |
| C                                              | 102.49       | 80.96       | <b>80.96</b> | C9                 | C                                                | 104.98       | 78.47       | <b>78.47</b> | C9                 |
| C                                              | 134.27       | 49.19       | <b>49.19</b> | CH <sub>9</sub>    | C                                                | 136.41       | 47.04       | <b>47.04</b> | CH <sub>9</sub>    |
| H                                              | 28.52        | 3.43        | <b>3.43</b>  |                    | H                                                | 29.19        | 2.76        | <b>2.76</b>  |                    |
| C                                              | 161.30       | 22.15       | <b>22.15</b> | Me <sub>9</sub> -1 | C                                                | 162.28       | 21.17       | <b>21.17</b> | Me <sub>9</sub> -1 |
| H                                              | 30.95        | 1.00        | <b>1.35</b>  |                    | H                                                | 30.33        | 1.62        | <b>1.69</b>  |                    |
| H                                              | 29.98        | 1.97        |              |                    | H                                                | 29.51        | 2.44        |              |                    |
| H                                              | 30.86        | 1.09        |              |                    | H                                                | 30.94        | 1.01        |              |                    |
| C                                              | 165.19       | 18.26       | <b>18.26</b> | Me <sub>9</sub> -2 | C                                                | 165.22       | 18.23       | <b>18.23</b> | Me <sub>9</sub> -2 |
| H                                              | 32.24        | -0.29       | <b>-0.01</b> |                    | H                                                | 31.61        | 0.34        | <b>0.12</b>  |                    |
| H                                              | 31.91        | 0.04        |              |                    | H                                                | 31.81        | 0.14        |              |                    |
| H                                              | 31.72        | 0.23        |              |                    | H                                                | 32.09        | -0.14       |              |                    |
| C                                              | 160.12       | 23.33       | <b>23.33</b> | Me-ortho           | C                                                | 163.03       | 20.42       | <b>20.42</b> | Me-ortho           |
| H                                              | 30.88        | 1.07        | <b>1.02</b>  |                    | H                                                | 31.08        | 0.88        | <b>0.95</b>  |                    |
| H                                              | 31.09        | 0.86        |              |                    | H                                                | 31.13        | 0.82        |              |                    |
| H                                              | 30.81        | 1.14        |              |                    | H                                                | 30.79        | 1.16        |              |                    |
| C                                              | 159.05       | 24.40       | <b>24.40</b> | Me-ortho'          | C                                                | 160.37       | 23.08       | <b>23.08</b> | Me-ortho'          |
| H                                              | 29.84        | 2.11        | <b>2.66</b>  |                    | H                                                | 29.87        | 2.08        | <b>2.60</b>  |                    |
| H                                              | 28.70        | 3.25        |              |                    | H                                                | 28.80        | 3.15        |              |                    |
| H                                              | 29.32        | 2.63        | <b>2.55</b>  | H                  | 29.38                                            | 2.57         | <b>2.36</b> |              |                    |
| C                                              | 160.90       | 22.55       |              | Me-para            | C                                                | 160.05       |             | 23.40        | Me-para            |
| H                                              | 29.43        | 2.52        |              |                    | H                                                | 29.60        |             | 2.35         |                    |
| H                                              | 29.94        | 2.01        |              |                    | H                                                | 29.32        |             | 2.63         |                    |
| H                                              | 30.01        | 1.94        | H            |                    | 29.84                                            | 2.11         |             |              |                    |

Note: H chemical shift relative to TMS (calculated at the same level of theory) have been shifted upfield by 0.27 ppm.

| <b>Compound 1</b> | <b>Method/<br/>basis set</b> | <b>Total Energy<br/>(a.u.)</b> | <b>Rel. E.<br/>(kcal/mol)</b> |                     |
|-------------------|------------------------------|--------------------------------|-------------------------------|---------------------|
| GS syn            | B3LYP/6-31G(d)               | -1081.68890321                 | <b>0.000</b>                  | <b>full opt.</b>    |
| GS anti           | B3LYP/6-31G(d)               | -1081.68721229                 | <b>1.061</b>                  | <b>full opt.</b>    |
| GS syn            | B3LYP/6-311++G(2d,p)         | -1081.98760557                 | <b>0.000</b>                  | <b>full opt.</b>    |
| GS anti           | B3LYP/6-311++G(2d,p)         | -1081.98637494                 | <b>0.772</b>                  | <b>full opt.</b>    |
| GS syn, CH2Cl2    | B3LYP/6-311++G(2d,p)         | -1082.00072525                 | <b>0.000</b>                  | <b>single point</b> |
| GS anti, CH2Cl2   | B3LYP/6-311++G(2d,p)         | -1082.00054937                 | <b>0.110</b>                  | <b>single point</b> |
| GS syn            | M05-2X/6-31G(d)              | -1081.57963156                 | <b>0.000</b>                  | <b>full opt.</b>    |
| GS anti           | M05-2X/6-31G(d)              | -1081.57577163                 | <b>2.422</b>                  | <b>full opt.</b>    |
| GS syn            | PBE1PBE/6-31G(d)             | -1080.41645902                 | <b>0.000</b>                  | <b>full opt.</b>    |
| GS anti           | PBE1PBE/6-31G(d)             | -1080.41387963                 | <b>1.619</b>                  | <b>full opt.</b>    |
| GS syn            | HF(full)/6-31G(d)            | -1074.60973184                 | <b>0.000</b>                  | <b>full opt.</b>    |
| GS anti           | HF(FULL)/6-31G(d)            | -1074.60967200                 | <b>0.038</b>                  | <b>full opt.</b>    |
| GS syn            | HF/cc-pVDZ                   | -1074.69927418                 | <b>0.000</b>                  | <b>full opt.</b>    |
| GS anti           | HF/cc-pVDZ                   | -1074.69714115                 | <b>1.338</b>                  | <b>full opt.</b>    |
| GS syn            | MP2(full)/6-31G(d)           | -1078.12895150                 | <b>0.000</b>                  | <b>single point</b> |
| GS anti           | MP2(full)/6-31G(d)           | -1078.12371878                 | <b>3.284</b>                  | <b>single point</b> |
| GS syn            | CISD(full)/6-31G(d)          | -1076.83280110                 | <b>0.000</b>                  | <b>single point</b> |
| GS anti           | CISD(FULL)/6-31G(d)          | -1076.83071840                 | <b>1.307</b>                  | <b>single point</b> |

Summary of DFT calculated energies for 1-5

|                           | Method/<br>basis set | Total Energy<br>(a.u.) | Rel. E.<br>(kcal/mol) | G° after<br>ZPE corr. | img<br>freq |
|---------------------------|----------------------|------------------------|-----------------------|-----------------------|-------------|
| <b>Compound 1</b>         |                      |                        |                       |                       |             |
| GS syn                    | B3LYP/6-311++G(2d,p) | -1081.98760557         | 0.00                  | 0.00                  | 0           |
| GS anti                   | B3LYP/6-311++G(2d,p) | -1081.98637494         | 0.77                  | 0.42                  | 0           |
| TS Fluorene-CO rotation   | B3LYP/6-311++G(2d,p) | -1081.97696372         | 6.68                  | 7.37                  | 1           |
| TS Ph-CO rotation on syn  | B3LYP/6-311++G(2d,p) | -1081.97997975         | 4.79                  | 5.59                  | 1           |
| TS Ph-CO rotation on anti | B3LYP/6-311++G(2d,p) | -1081.97585029         | 7.38                  | 7.00                  | 1           |
| <b>Compound 2</b>         |                      |                        |                       |                       |             |
| GS syn                    | B3LYP/6-31G(d)       | -1121.00145471         | 0.00                  | 0.00                  | 0           |
| GS anti                   | B3LYP/6-31G(d)       | -1120.99053083         | 6.85                  | 6.01                  | 0           |
| TS Ph-CO rotation on syn  | B3LYP/6-31G(d)       | -1120.99435692         | 4.45                  | 4.78                  | 1           |
| TS Fluorene-CO rotation   | B3LYP/6-31G(d)       | -1120.98969011         | 7.38                  | 7.36                  | 1           |
| <b>Compound 3</b>         |                      |                        |                       |                       |             |
| GS syn                    | B3LYP/6-31G(d)       | -1199.62296792         | 0.00                  | 0.00                  | 0           |
| GS anti                   | B3LYP/6-31G(d)       | -1199.61376777         | 5.77                  | 5.09                  | 0           |
| TS Ph-CO rotation on syn  | B3LYP/6-31G(d)       | -1199.61636314         | 4.14                  | 4.66                  | 1           |
| TS isopropyl rotation     | B3LYP/6-31G(d)       | -1199.61049457         | 7.83                  | 9.04                  | 1           |
| <b>Compound 4</b>         |                      |                        |                       |                       |             |
| GS syn                    | B3LYP/6-31G(d)       | -1003.05385494         | 0.00                  | 0.00                  | 0           |
| correlated TS 0°-90°      | B3LYP/6-31G(d)       | -1003.03483411         | 11.94                 | 13.68                 | 1           |
| correlated TS 90°-90°     | B3LYP/6-31G(d)       | -1003.04706022         | 4.26                  | 6.50                  | 1           |
| <b>Compound 5</b>         |                      |                        |                       |                       |             |
| GS syn(trans)             | B3LYP/6-31G(d)       | -1081.67340926         | 0.00                  | 0.00                  | 0           |
| GS syn(cis)               | B3LYP/6-31G(d)       | -1081.67311416         | 0.19                  | 0.15                  | 0           |
| correlated TS 0°-90°      | B3LYP/6-31G(d)       | -1081.65277085         | 12.95                 | 15.59                 | 1           |
| correlated TS 90°-90°     | B3LYP/6-31G(d)       | -1081.66573106         | 4.82                  | 7.19                  | 1           |

Compound 1 - Ground State syn

Method: b3lyp/6-311++g(2d,p)  
 SCF Done: E(RB+HF-LYP) = -1081.98760557 A.U. after 16 cycles  
 Imaginary frequencies: 0 (9.7)

This molecule is an asymmetric top.

Rotational symmetry number 1.

Warning -- assumption of classical behavior for rotation  
 may cause significant error

|                                  |                        |         |         |
|----------------------------------|------------------------|---------|---------|
| Rotational temperatures (Kelvin) | 0.01267                | 0.00643 | 0.00639 |
| Rotational constants (GHZ):      | 0.26398                | 0.13404 | 0.13315 |
| Zero-point vibrational energy    | 1169314.4 (Joules/Mol) |         |         |
|                                  | 279.47286 (Kcal/Mol)   |         |         |

Warning -- explicit consideration of 39 degrees of freedom as  
 vibrations may cause significant error

|                                              |                             |
|----------------------------------------------|-----------------------------|
| Zero-point correction=                       | 0.445368 (Hartree/Particle) |
| Thermal correction to Energy=                | 0.469870                    |
| Thermal correction to Enthalpy=              | 0.470814                    |
| Thermal correction to Gibbs Free Energy=     | 0.388954                    |
| Sum of electronic and zero-point Energies=   | -1081.542237                |
| Sum of electronic and thermal Energies=      | -1081.517736                |
| Sum of electronic and thermal Enthalpies=    | -1081.516792                |
| Sum of electronic and thermal Free Energies= | -1081.598651                |

Standard orientation:

| Center<br>Number | Atomic<br>Number | Atomic<br>Type | Coordinates (Angstroms) |           |           |
|------------------|------------------|----------------|-------------------------|-----------|-----------|
|                  |                  |                | X                       | Y         | Z         |
| 1                | 6                | 0              | 1.770040                | -1.737368 | -2.266456 |
| 2                | 1                | 0              | 1.037862                | -1.765052 | -3.065528 |
| 3                | 6                | 0              | 2.537276                | -2.865139 | -1.975636 |
| 4                | 1                | 0              | 2.395947                | -3.773336 | -2.549167 |
| 5                | 6                | 0              | 3.487681                | -2.833391 | -0.955075 |
| 6                | 1                | 0              | 4.077384                | -3.717909 | -0.745289 |
| 7                | 6                | 0              | 3.686635                | -1.678022 | -0.204687 |
| 8                | 1                | 0              | 4.429745                | -1.661174 | 0.584270  |
| 9                | 6                | 0              | 3.632206                | 1.313486  | 1.181544  |
| 10               | 1                | 0              | 4.384810                | 0.722197  | 1.690367  |
| 11               | 6                | 0              | 3.389017                | 2.626543  | 1.574309  |
| 12               | 1                | 0              | 3.953672                | 3.055283  | 2.393731  |
| 13               | 6                | 0              | 2.425664                | 3.397577  | 0.923711  |
| 14               | 1                | 0              | 2.250001                | 4.417940  | 1.242707  |
| 15               | 6                | 0              | 1.304024                | 0.774006  | -1.668033 |
| 16               | 6                | 0              | 1.689139                | 2.868113  | -0.135559 |
| 17               | 1                | 0              | 0.946494                | 3.474296  | -0.641941 |
| 18               | 6                | 0              | 1.962660                | -0.586888 | -1.518396 |
| 19               | 6                | 0              | 1.925272                | 1.559759  | -0.525920 |
| 20               | 6                | 0              | 2.917671                | -0.551877 | -0.486885 |
| 21               | 6                | 0              | 2.894194                | 0.778873  | 0.128593  |
| 22               | 6                | 0              | -1.118712               | 0.298620  | -0.683231 |
| 23               | 6                | 0              | -0.629673               | -0.257165 | 0.500582  |
| 24               | 1                | 0              | 0.435840                | -0.342206 | 0.655822  |
| 25               | 6                | 0              | -2.500821               | 0.399092  | -0.875463 |
| 26               | 1                | 0              | -2.849788               | 0.832411  | -1.803880 |
| 27               | 6                | 0              | -0.233788               | 0.800460  | -1.781413 |

|    |   |   |           |           |           |
|----|---|---|-----------|-----------|-----------|
| 28 | 6 | 0 | -1.499895 | -0.711591 | 1.490977  |
| 29 | 6 | 0 | -2.871437 | -0.594105 | 1.266085  |
| 30 | 1 | 0 | -3.558419 | -0.944116 | 2.031356  |
| 31 | 6 | 0 | -3.394652 | -0.043667 | 0.092805  |
| 32 | 6 | 0 | -4.898643 | 0.060322  | -0.107666 |
| 33 | 1 | 0 | -5.367469 | -0.342554 | 0.796408  |
| 34 | 6 | 0 | -0.978902 | -1.323060 | 2.782426  |
| 35 | 1 | 0 | -1.855546 | -1.576769 | 3.387679  |
| 36 | 1 | 0 | 1.627290  | 1.216636  | -2.615728 |
| 37 | 6 | 0 | -0.133814 | -0.326157 | 3.591891  |
| 38 | 1 | 0 | 0.769131  | -0.035935 | 3.049330  |
| 39 | 1 | 0 | 0.176603  | -0.770141 | 4.541401  |
| 40 | 1 | 0 | -0.697134 | 0.583628  | 3.810149  |
| 41 | 6 | 0 | -0.203929 | -2.625937 | 2.525322  |
| 42 | 1 | 0 | -0.817058 | -3.350983 | 1.985792  |
| 43 | 1 | 0 | 0.107346  | -3.079732 | 3.469911  |
| 44 | 1 | 0 | 0.694901  | -2.443018 | 1.931387  |
| 45 | 6 | 0 | -5.377792 | -0.792082 | -1.294074 |
| 46 | 1 | 0 | -4.952269 | -0.435343 | -2.235305 |
| 47 | 1 | 0 | -6.466385 | -0.748422 | -1.383208 |
| 48 | 1 | 0 | -5.088330 | -1.838130 | -1.172530 |
| 49 | 6 | 0 | -5.357960 | 1.519953  | -0.254673 |
| 50 | 1 | 0 | -4.935741 | 1.979058  | -1.151910 |
| 51 | 1 | 0 | -5.049869 | 2.120397  | 0.603994  |
| 52 | 1 | 0 | -6.446836 | 1.573810  | -0.334454 |
| 53 | 8 | 0 | -0.716367 | 1.253378  | -2.803229 |

-----

**Compound 1 - Ground State anti**

Method: b3lyp/6-311++g(2d,p)

SCF Done: E(RB+HF-LYP) = -1081.98637494 A.U. after 15 cycles

Imaginary frequencies: 0 (9.6)

This molecule is an asymmetric top.

Rotational symmetry number 1.

Warning -- assumption of classical behavior for rotation  
may cause significant error

Rotational temperatures (Kelvin) 0.01272 0.00543 0.00496

Rotational constants (GHZ): 0.26506 0.11320 0.10337

Zero-point vibrational energy 1168741.5 (Joules/Mol)

279.33592 (Kcal/Mol)

Warning -- explicit consideration of 39 degrees of freedom as  
vibrations may cause significant error

Zero-point correction= 0.445150 (Hartree/Particle)

Thermal correction to Energy= 0.469692

Thermal correction to Enthalpy= 0.470636

Thermal correction to Gibbs Free Energy= 0.388397

Sum of electronic and zero-point Energies= -1081.541225

Sum of electronic and thermal Energies= -1081.516683

Sum of electronic and thermal Enthalpies= -1081.515739

Sum of electronic and thermal Free Energies= -1081.597978

## Standard orientation:

| Center<br>Number | Atomic<br>Number | Atomic<br>Type | Coordinates (Angstroms) |           |           |
|------------------|------------------|----------------|-------------------------|-----------|-----------|
|                  |                  |                | X                       | Y         | Z         |
| 1                | 6                | 0              | 2.877678                | -1.728887 | -1.877227 |
| 2                | 1                | 0              | 2.039638                | -2.076903 | -2.470270 |
| 3                | 6                | 0              | 4.149780                | -2.259673 | -2.085000 |
| 4                | 1                | 0              | 4.299029                | -3.015436 | -2.846887 |
| 5                | 6                | 0              | 5.231827                | -1.830279 | -1.316508 |
| 6                | 1                | 0              | 6.213760                | -2.254569 | -1.489849 |
| 7                | 6                | 0              | 5.061483                | -0.865045 | -0.329222 |
| 8                | 1                | 0              | 5.906497                | -0.537013 | 0.265059  |
| 9                | 6                | 0              | 3.999212                | 1.407100  | 1.795473  |
| 10               | 1                | 0              | 5.061218                | 1.259908  | 1.954098  |
| 11               | 6                | 0              | 3.296792                | 2.329351  | 2.566086  |
| 12               | 1                | 0              | 3.815624                | 2.900210  | 3.327106  |
| 13               | 6                | 0              | 1.931246                | 2.523826  | 2.369185  |
| 14               | 1                | 0              | 1.396978                | 3.242781  | 2.978715  |
| 15               | 6                | 0              | 1.443477                | -0.028302 | -0.498369 |
| 16               | 6                | 0              | 1.243501                | 1.798348  | 1.395196  |
| 17               | 1                | 0              | 0.180493                | 1.953414  | 1.256113  |
| 18               | 6                | 0              | 2.705335                | -0.766665 | -0.896158 |
| 19               | 6                | 0              | 1.940447                | 0.881276  | 0.624339  |
| 20               | 6                | 0              | 3.791167                | -0.334386 | -0.121175 |
| 21               | 6                | 0              | 3.317527                | 0.680105  | 0.824456  |
| 22               | 6                | 0              | -1.117761               | -0.469010 | -0.119339 |
| 23               | 6                | 0              | -2.104581               | -1.264997 | 0.470897  |
| 24               | 1                | 0              | -1.785044               | -2.169965 | 0.971516  |
| 25               | 6                | 0              | -1.491062               | 0.706379  | -0.776542 |
| 26               | 1                | 0              | -0.739544               | 1.332780  | -1.238634 |
| 27               | 6                | 0              | 0.302167                | -0.947756 | -0.021199 |
| 28               | 6                | 0              | -3.446558               | -0.907146 | 0.415087  |
| 29               | 6                | 0              | -3.784712               | 0.273201  | -0.253731 |
| 30               | 1                | 0              | -4.830164               | 0.563181  | -0.307439 |
| 31               | 6                | 0              | -2.829823               | 1.091816  | -0.855593 |
| 32               | 6                | 0              | -3.247353               | 2.363848  | -1.577613 |
| 33               | 1                | 0              | -4.336538               | 2.431914  | -1.489994 |
| 34               | 6                | 0              | -4.523713               | -1.765939 | 1.059030  |
| 35               | 1                | 0              | -5.482164               | -1.274218 | 0.861510  |
| 36               | 1                | 0              | 1.093148                | 0.576781  | -1.338822 |
| 37               | 6                | 0              | -4.352207               | -1.846539 | 2.584881  |
| 38               | 1                | 0              | -3.413642               | -2.338050 | 2.852550  |
| 39               | 1                | 0              | -5.168113               | -2.420072 | 3.032194  |
| 40               | 1                | 0              | -4.348500               | -0.852177 | 3.036614  |
| 41               | 6                | 0              | -4.586998               | -3.169097 | 0.434485  |
| 42               | 1                | 0              | -4.745114               | -3.115580 | -0.644806 |
| 43               | 1                | 0              | -5.406996               | -3.745425 | 0.870386  |
| 44               | 1                | 0              | -3.661385               | -3.722880 | 0.609132  |
| 45               | 6                | 0              | -2.909742               | 2.311342  | -3.076739 |
| 46               | 1                | 0              | -1.830030               | 2.261919  | -3.239614 |
| 47               | 1                | 0              | -3.280233               | 3.205037  | -3.585238 |
| 48               | 1                | 0              | -3.359130               | 1.437784  | -3.553593 |
| 49               | 6                | 0              | -2.653937               | 3.621081  | -0.921192 |
| 50               | 1                | 0              | -1.563166               | 3.630676  | -0.992667 |
| 51               | 1                | 0              | -2.920356               | 3.679120  | 0.136318  |
| 52               | 1                | 0              | -3.024672               | 4.522919  | -1.414899 |
| 53               | 8                | 0              | 0.553657                | -2.037479 | 0.447545  |

**Compound 1 - Transition State Fluorene-CO rotation**

Method: b3lyp/6-311++g(2d,p)  
 SCF Done: E(RB+HF-LYP) = -1081.97696372 A.U. after 9 cycles  
 Imaginary frequencies: 1 (-35.7)

This molecule is an asymmetric top.

Rotational symmetry number 1.

Warning -- assumption of classical behavior for rotation  
 may cause significant error

|                                  |         |         |         |
|----------------------------------|---------|---------|---------|
| Rotational temperatures (Kelvin) | 0.01303 | 0.00597 | 0.00532 |
| Rotational constants (GHZ):      | 0.27152 | 0.12448 | 0.11086 |

1 imaginary frequencies ignored.

|                               |                        |
|-------------------------------|------------------------|
| Zero-point vibrational energy | 1166819.3 (Joules/Mol) |
|                               | 278.87652 (Kcal/Mol)   |

Warning -- explicit consideration of 38 degrees of freedom as  
 vibrations may cause significant error

|                                              |                             |
|----------------------------------------------|-----------------------------|
| Zero-point correction=                       | 0.444418 (Hartree/Particle) |
| Thermal correction to Energy=                | 0.468202                    |
| Thermal correction to Enthalpy=              | 0.469146                    |
| Thermal correction to Gibbs Free Energy=     | 0.390014                    |
| Sum of electronic and zero-point Energies=   | -1081.532546                |
| Sum of electronic and thermal Energies=      | -1081.508762                |
| Sum of electronic and thermal Enthalpies=    | -1081.507818                |
| Sum of electronic and thermal Free Energies= | -1081.586950                |

Standard orientation:

| Center Number | Atomic Number | Atomic Type | Coordinates (Angstroms) |           |           |
|---------------|---------------|-------------|-------------------------|-----------|-----------|
|               |               |             | X                       | Y         | Z         |
| 1             | 6             | 0           | 0.537830                | 0.889311  | 1.858118  |
| 2             | 1             | 0           | -0.431179               | 0.428901  | 2.002653  |
| 3             | 6             | 0           | 0.818628                | 2.117809  | 2.456152  |
| 4             | 1             | 0           | 0.063494                | 2.602243  | 3.063554  |
| 5             | 6             | 0           | 2.061151                | 2.725096  | 2.282664  |
| 6             | 1             | 0           | 2.262963                | 3.679975  | 2.753643  |
| 7             | 6             | 0           | 3.047959                | 2.108197  | 1.520272  |
| 8             | 1             | 0           | 4.019337                | 2.574672  | 1.403790  |
| 9             | 6             | 0           | 4.953911                | 0.132282  | -0.264645 |
| 10            | 1             | 0           | 5.519801                | 1.021377  | -0.011430 |
| 11            | 6             | 0           | 5.547008                | -0.892534 | -0.995087 |
| 12            | 1             | 0           | 6.578307                | -0.798423 | -1.314370 |
| 13            | 6             | 0           | 4.826513                | -2.042022 | -1.316706 |
| 14            | 1             | 0           | 5.302790                | -2.832082 | -1.885016 |
| 15            | 6             | 0           | 1.489985                | -1.060889 | 0.356684  |
| 16            | 6             | 0           | 3.497869                | -2.186586 | -0.917548 |
| 17            | 1             | 0           | 2.940613                | -3.074835 | -1.181224 |
| 18            | 6             | 0           | 1.510744                | 0.279034  | 1.080327  |
| 19            | 6             | 0           | 2.902429                | -1.164857 | -0.193118 |
| 20            | 6             | 0           | 2.771892                | 0.880217  | 0.925473  |
| 21            | 6             | 0           | 3.628399                | -0.008691 | 0.136053  |
| 22            | 6             | 0           | -0.972542               | -0.686917 | -0.516486 |
| 23            | 6             | 0           | -1.972249               | -1.406029 | 0.133560  |
| 24            | 1             | 0           | -1.749493               | -2.393064 | 0.523750  |
| 25            | 6             | 0           | -1.243581               | 0.572135  | -1.044456 |
| 26            | 1             | 0           | -0.454711               | 1.119801  | -1.547115 |



|    |   |   |           |           |           |
|----|---|---|-----------|-----------|-----------|
| 27 | 6 | 0 | 0.385599  | -1.311652 | -0.700273 |
| 28 | 6 | 0 | -3.255316 | -0.873076 | 0.268755  |
| 29 | 6 | 0 | -3.502892 | 0.388947  | -0.271881 |
| 30 | 1 | 0 | -4.498896 | 0.811613  | -0.178638 |
| 31 | 6 | 0 | -2.519323 | 1.125175  | -0.934698 |
| 32 | 6 | 0 | -2.842120 | 2.490705  | -1.520635 |
| 33 | 1 | 0 | -3.897647 | 2.685035  | -1.303208 |
| 34 | 6 | 0 | -4.363657 | -1.645193 | 0.967240  |
| 35 | 1 | 0 | -5.254271 | -1.008642 | 0.941755  |
| 36 | 1 | 0 | 1.310440  | -1.861825 | 1.090490  |
| 37 | 6 | 0 | -4.036102 | -1.917803 | 2.444377  |
| 38 | 1 | 0 | -3.161233 | -2.565372 | 2.545478  |
| 39 | 1 | 0 | -4.874631 | -2.416015 | 2.937685  |
| 40 | 1 | 0 | -3.829023 | -0.989961 | 2.982028  |
| 41 | 6 | 0 | -4.707442 | -2.948299 | 0.227355  |
| 42 | 1 | 0 | -4.972797 | -2.753794 | -0.813752 |
| 43 | 1 | 0 | -5.552085 | -3.450188 | 0.706508  |
| 44 | 1 | 0 | -3.863057 | -3.642223 | 0.231351  |
| 45 | 6 | 0 | -2.676010 | 2.511104  | -3.048877 |
| 46 | 1 | 0 | -1.635857 | 2.341501  | -3.338357 |
| 47 | 1 | 0 | -2.979655 | 3.479761  | -3.454231 |
| 48 | 1 | 0 | -3.283638 | 1.737690  | -3.523258 |
| 49 | 6 | 0 | -2.022028 | 3.609581  | -0.858302 |
| 50 | 1 | 0 | -0.952973 | 3.485541  | -1.046980 |
| 51 | 1 | 0 | -2.168324 | 3.619667  | 0.223758  |
| 52 | 1 | 0 | -2.318526 | 4.585484  | -1.251431 |
| 53 | 8 | 0 | 0.585040  | -2.062140 | -1.625417 |

-----

**Compound 1 - Transition State Phenyl-CO rotation of syn conformer**

Method: b3lyp/6-311++g(2d,p)

SCF Done: E(RB+HF-LYP) = -1081.97997975 A.U. after 9 cycles

Imaginary frequencies: 1 (-30.1)

This molecule is an asymmetric top.

Rotational symmetry number 1.

Warning -- assumption of classical behavior for rotation  
may cause significant error

Rotational temperatures (Kelvin) 0.01015 0.00931 0.00633

Rotational constants (GHZ): 0.21141 0.19402 0.13193

1 imaginary frequencies ignored.

Zero-point vibrational energy 1176973.9 (Joules/Mol)

281.30350 (Kcal/Mol)

Warning -- explicit consideration of 38 degrees of freedom as  
vibrations may cause significant error

Zero-point correction= 0.444666 (Hartree/Particle)

Thermal correction to Energy= 0.468490

Thermal correction to Enthalpy= 0.469434

Thermal correction to Gibbs Free Energy= 0.390233

Sum of electronic and zero-point Energies= -1081.535314

Sum of electronic and thermal Energies= -1081.511490

Sum of electronic and thermal Enthalpies= -1081.510546

Sum of electronic and thermal Free Energies= -1081.589746

Standard orientation:

| Center<br>Number | Atomic<br>Number | Atomic<br>Type | Coordinates (Angstroms) |           |           |
|------------------|------------------|----------------|-------------------------|-----------|-----------|
|                  |                  |                | X                       | Y         | Z         |
| 1                | 6                | 0              | 2.406269                | 2.261241  | 1.013307  |
| 2                | 1                | 0              | 2.142581                | 2.626998  | 1.999643  |
| 3                | 6                | 0              | 2.895838                | 3.137734  | 0.045315  |
| 4                | 1                | 0              | 3.010960                | 4.189011  | 0.280642  |
| 5                | 6                | 0              | 3.242674                | 2.670983  | -1.222739 |
| 6                | 1                | 0              | 3.620748                | 3.365790  | -1.963311 |
| 7                | 6                | 0              | 3.116629                | 1.322696  | -1.543663 |
| 8                | 1                | 0              | 3.398669                | 0.967788  | -2.528110 |
| 9                | 6                | 0              | 2.684133                | -1.945682 | -1.606647 |
| 10               | 1                | 0              | 3.055004                | -1.639155 | -2.577835 |
| 11               | 6                | 0              | 2.453965                | -3.291621 | -1.338238 |
| 12               | 1                | 0              | 2.642762                | -4.032093 | -2.106473 |
| 13               | 6                | 0              | 1.992339                | -3.700093 | -0.086844 |
| 14               | 1                | 0              | 1.831123                | -4.753531 | 0.108403  |
| 15               | 6                | 0              | 1.784952                | -0.225390 | 1.566688  |
| 16               | 6                | 0              | 1.741774                | -2.763708 | 0.915628  |
| 17               | 1                | 0              | 1.389390                | -3.086947 | 1.889109  |
| 18               | 6                | 0              | 2.273035                | 0.919218  | 0.693765  |
| 19               | 6                | 0              | 1.959011                | -1.421100 | 0.647933  |
| 20               | 6                | 0              | 2.632329                | 0.443986  | -0.578483 |
| 21               | 6                | 0              | 2.438653                | -1.008739 | -0.606519 |
| 22               | 6                | 0              | -0.782169               | 0.098084  | 1.069994  |
| 23               | 6                | 0              | -1.466077               | -1.044432 | 0.659721  |
| 24               | 1                | 0              | -1.152208               | -2.013441 | 1.027498  |
| 25               | 6                | 0              | -1.183211               | 1.351498  | 0.611619  |
| 26               | 1                | 0              | -0.648444               | 2.233583  | 0.941867  |
| 27               | 6                | 0              | 0.344029                | -0.010127 | 2.068998  |
| 28               | 6                | 0              | -2.553683               | -0.949003 | -0.208442 |
| 29               | 6                | 0              | -2.932406               | 0.317144  | -0.654352 |
| 30               | 1                | 0              | -3.777936               | 0.403060  | -1.330652 |
| 31               | 6                | 0              | -2.265769               | 1.477000  | -0.259097 |
| 32               | 6                | 0              | -2.714061               | 2.836478  | -0.772112 |
| 33               | 1                | 0              | -3.599371               | 2.662296  | -1.392670 |
| 34               | 6                | 0              | -3.311830               | -2.186597 | -0.663187 |
| 35               | 1                | 0              | -4.123296               | -1.838251 | -1.310659 |
| 36               | 1                | 0              | 2.394035                | -0.323096 | 2.469497  |
| 37               | 6                | 0              | -3.953939               | -2.935363 | 0.516075  |
| 38               | 1                | 0              | -3.195840               | -3.322702 | 1.201387  |
| 39               | 1                | 0              | -4.541614               | -3.784273 | 0.156972  |
| 40               | 1                | 0              | -4.615012               | -2.280551 | 1.087597  |
| 41               | 6                | 0              | -2.425527               | -3.125265 | -1.498201 |
| 42               | 1                | 0              | -2.004571               | -2.606693 | -2.362086 |
| 43               | 1                | 0              | -3.005241               | -3.978175 | -1.861215 |
| 44               | 1                | 0              | -1.592719               | -3.513980 | -0.907089 |
| 45               | 6                | 0              | -1.646412               | 3.488936  | -1.666034 |
| 46               | 1                | 0              | -0.731011               | 3.693122  | -1.105299 |
| 47               | 1                | 0              | -2.010669               | 4.437518  | -2.069632 |
| 48               | 1                | 0              | -1.383201               | 2.840888  | -2.504661 |
| 49               | 6                | 0              | -3.132305               | 3.778163  | 0.368367  |
| 50               | 1                | 0              | -2.287069               | 4.019077  | 1.017924  |
| 51               | 1                | 0              | -3.910051               | 3.327396  | 0.988281  |
| 52               | 1                | 0              | -3.518810               | 4.718302  | -0.033757 |
| 53               | 8                | 0              | 0.127794                | 0.088976  | 3.255939  |

**Compound 1 - Transition State Phenyl-CO rotation of anti conformer**

Method: b3lyp/6-311++g(2d,p)  
 SCF Done: E(RB+HF-LYP) = -1081.97585029 A.U. after 9 cycles  
 Imaginary frequencies: 1 (-26.9)

This molecule is an asymmetric top.

Rotational symmetry number 1.

Warning -- assumption of classical behavior for rotation  
 may cause significant error

|                                  |         |         |         |
|----------------------------------|---------|---------|---------|
| Rotational temperatures (Kelvin) | 0.01218 | 0.00624 | 0.00441 |
| Rotational constants (GHZ):      | 0.25373 | 0.12998 | 0.09196 |

1 imaginary frequencies ignored.

|                               |                        |
|-------------------------------|------------------------|
| Zero-point vibrational energy | 1166571.9 (Joules/Mol) |
|                               | 278.81737 (Kcal/Mol)   |

Warning -- explicit consideration of 38 degrees of freedom as  
 vibrations may cause significant error

|                                              |                             |
|----------------------------------------------|-----------------------------|
| Zero-point correction=                       | 0.444324 (Hartree/Particle) |
| Thermal correction to Energy=                | 0.468278                    |
| Thermal correction to Enthalpy=              | 0.469222                    |
| Thermal correction to Gibbs Free Energy=     | 0.388355                    |
| Sum of electronic and zero-point Energies=   | -1081.531527                |
| Sum of electronic and thermal Energies=      | -1081.507572                |
| Sum of electronic and thermal Enthalpies=    | -1081.506628                |
| Sum of electronic and thermal Free Energies= | -1081.587495                |

Standard orientation:

| Center Number | Atomic Number | Atomic Type | Coordinates (Angstroms) |           |           |
|---------------|---------------|-------------|-------------------------|-----------|-----------|
|               |               |             | X                       | Y         | Z         |
| 1             | 6             | 0           | 2.165699                | -2.573076 | -0.293648 |
| 2             | 1             | 0           | 1.172307                | -2.987954 | -0.423073 |
| 3             | 6             | 0           | 3.264834                | -3.422817 | -0.173024 |
| 4             | 1             | 0           | 3.121274                | -4.496064 | -0.208966 |
| 5             | 6             | 0           | 4.547195                | -2.901970 | -0.004562 |
| 6             | 1             | 0           | 5.390469                | -3.575691 | 0.090692  |
| 7             | 6             | 0           | 4.754044                | -1.526655 | 0.040074  |
| 8             | 1             | 0           | 5.754313                | -1.129289 | 0.167534  |
| 9             | 6             | 0           | 4.565738                | 1.757078  | -0.003557 |
| 10            | 1             | 0           | 5.604346                | 1.478445  | 0.131603  |
| 11            | 6             | 0           | 4.205796                | 3.098841  | -0.086080 |
| 12            | 1             | 0           | 4.967772                | 3.865500  | -0.010675 |
| 13            | 6             | 0           | 2.874001                | 3.466508  | -0.270669 |
| 14            | 1             | 0           | 2.610397                | 4.515033  | -0.340462 |
| 15            | 6             | 0           | 1.348238                | -0.080998 | -0.348317 |
| 16            | 6             | 0           | 1.877969                | 2.494845  | -0.367909 |
| 17            | 1             | 0           | 0.846736                | 2.791719  | -0.519315 |
| 18            | 6             | 0           | 2.367740                | -1.203576 | -0.246176 |
| 19            | 6             | 0           | 2.231318                | 1.158323  | -0.277201 |
| 20            | 6             | 0           | 3.658322                | -0.677186 | -0.082557 |
| 21            | 6             | 0           | 3.573871                | 0.785639  | -0.100609 |
| 22            | 6             | 0           | -1.145854               | -0.064210 | 0.434625  |
| 23            | 6             | 0           | -1.851968               | -1.249856 | 0.245824  |
| 24            | 1             | 0           | -1.341812               | -2.198302 | 0.371450  |
| 25            | 6             | 0           | -1.790876               | 1.162075  | 0.297737  |
| 26            | 1             | 0           | -1.235916               | 2.077965  | 0.464556  |

|    |   |   |           |           |           |
|----|---|---|-----------|-----------|-----------|
| 27 | 6 | 0 | 0.315377  | -0.122411 | 0.808042  |
| 28 | 6 | 0 | -3.208525 | -1.224732 | -0.079852 |
| 29 | 6 | 0 | -3.831076 | 0.016851  | -0.212646 |
| 30 | 1 | 0 | -4.886755 | 0.048516  | -0.465123 |
| 31 | 6 | 0 | -3.147388 | 1.218567  | -0.025897 |
| 32 | 6 | 0 | -3.872289 | 2.547394  | -0.169098 |
| 33 | 1 | 0 | -4.914366 | 2.313013  | -0.409800 |
| 34 | 6 | 0 | -3.999467 | -2.508453 | -0.275766 |
| 35 | 1 | 0 | -5.026138 | -2.211665 | -0.513888 |
| 36 | 1 | 0 | 0.808429  | -0.121275 | -1.298258 |
| 37 | 6 | 0 | -4.050822 | -3.353394 | 1.007682  |
| 38 | 1 | 0 | -3.055558 | -3.701058 | 1.295929  |
| 39 | 1 | 0 | -4.680530 | -4.234635 | 0.860364  |
| 40 | 1 | 0 | -4.457360 | -2.779961 | 1.843190  |
| 41 | 6 | 0 | -3.474306 | -3.334777 | -1.461278 |
| 42 | 1 | 0 | -3.472083 | -2.748963 | -2.382953 |
| 43 | 1 | 0 | -4.100128 | -4.216693 | -1.620034 |
| 44 | 1 | 0 | -2.453176 | -3.681818 | -1.283218 |
| 45 | 6 | 0 | -3.311276 | 3.386472  | -1.329020 |
| 46 | 1 | 0 | -2.272023 | 3.671711  | -1.146249 |
| 47 | 1 | 0 | -3.889776 | 4.305609  | -1.452208 |
| 48 | 1 | 0 | -3.345243 | 2.834393  | -2.270661 |
| 49 | 6 | 0 | -3.872531 | 3.348549  | 1.143237  |
| 50 | 1 | 0 | -2.859453 | 3.637489  | 1.434442  |
| 51 | 1 | 0 | -4.300543 | 2.766902  | 1.962186  |
| 52 | 1 | 0 | -4.459373 | 4.264029  | 1.032220  |
| 53 | 8 | 0 | 0.663951  | -0.208641 | 1.959322  |

---

Compound 2 - Ground State syn

Method: B3LYP/6-31g(d)  
 SCF Done: E(RB+HF-LYP) = -1121.00145471 A.U. after 7 cycles  
 Imaginary frequencies: 0 (11.4)

This molecule is an asymmetric top.  
 Rotational symmetry number 1.  
 Warning -- assumption of classical behavior for rotation  
 may cause significant error

|                                  |                        |         |         |
|----------------------------------|------------------------|---------|---------|
| Rotational temperatures (Kelvin) | 0.01161                | 0.00646 | 0.00622 |
| Rotational constants (GHZ):      | 0.24193                | 0.13450 | 0.12968 |
| Zero-point vibrational energy    | 1252775.0 (Joules/Mol) |         |         |
|                                  | 299.42042 (Kcal/Mol)   |         |         |

Warning -- explicit consideration of 43 degrees of freedom as  
 vibrations may cause significant error

|                                              |                             |
|----------------------------------------------|-----------------------------|
| Zero-point correction=                       | 0.477157 (Hartree/Particle) |
| Thermal correction to Energy=                | 0.502966                    |
| Thermal correction to Enthalpy=              | 0.503911                    |
| Thermal correction to Gibbs Free Energy=     | 0.420359                    |
| Sum of electronic and zero-point Energies=   | -1120.524298                |
| Sum of electronic and thermal Energies=      | -1120.498488                |
| Sum of electronic and thermal Enthalpies=    | -1120.497544                |
| Sum of electronic and thermal Free Energies= | -1120.581096                |

Standard orientation:

| Center<br>Number | Atomic<br>Number | Atomic<br>Type | Coordinates (Angstroms) |           |           |
|------------------|------------------|----------------|-------------------------|-----------|-----------|
|                  |                  |                | X                       | Y         | Z         |
| 1                | 6                | 0              | -1.696611               | -1.150753 | -2.541733 |
| 2                | 1                | 0              | -1.035150               | -1.940105 | -2.890370 |
| 3                | 6                | 0              | -2.356927               | -0.325950 | -3.459909 |
| 4                | 1                | 0              | -2.204372               | -0.476489 | -4.525135 |
| 5                | 6                | 0              | -3.211239               | 0.689969  | -3.018128 |
| 6                | 1                | 0              | -3.718013               | 1.320479  | -3.743757 |
| 7                | 6                | 0              | -3.419783               | 0.902192  | -1.652809 |
| 8                | 1                | 0              | -4.086259               | 1.692423  | -1.316365 |
| 9                | 6                | 0              | -3.419763               | 0.902108  | 1.652890  |
| 10               | 1                | 0              | -4.086273               | 1.692340  | 1.316513  |
| 11               | 6                | 0              | -3.211180               | 0.689823  | 3.018195  |
| 12               | 1                | 0              | -3.717941               | 1.320297  | 3.743864  |
| 13               | 6                | 0              | -2.356836               | -0.326099 | 3.459910  |
| 14               | 1                | 0              | -2.204251               | -0.476680 | 4.525127  |
| 15               | 6                | 0              | -1.345268               | -1.735588 | -0.000052 |
| 16               | 6                | 0              | -1.696533               | -1.150853 | 2.541682  |
| 17               | 1                | 0              | -1.035055               | -1.940224 | 2.890243  |
| 18               | 6                | 0              | -1.897753               | -0.939857 | -1.182618 |
| 19               | 6                | 0              | -1.897727               | -0.939891 | 1.182586  |
| 20               | 6                | 0              | -2.758965               | 0.083741  | -0.734253 |
| 21               | 6                | 0              | -2.758956               | 0.083708  | 0.734279  |
| 22               | 6                | 0              | 1.122403                | -0.674950 | -0.000025 |
| 23               | 6                | 0              | 0.682209                | 0.655309  | -0.000062 |
| 24               | 1                | 0              | -0.376287               | 0.874110  | -0.000074 |
| 25               | 6                | 0              | 2.502132                | -0.938257 | -0.000033 |
| 26               | 1                | 0              | 2.817033                | -1.976572 | 0.000035  |
| 27               | 6                | 0              | 0.209296                | -1.868807 | 0.000041  |

|    |   |   |           |           |           |
|----|---|---|-----------|-----------|-----------|
| 28 | 6 | 0 | 1.594402  | 1.716461  | -0.000091 |
| 29 | 6 | 0 | 2.960931  | 1.415494  | -0.000119 |
| 30 | 1 | 0 | 3.679149  | 2.234409  | -0.000142 |
| 31 | 6 | 0 | 3.437572  | 0.097184  | -0.000108 |
| 32 | 6 | 0 | 4.935132  | -0.184911 | -0.000123 |
| 33 | 1 | 0 | 5.446154  | 0.787809  | -0.000297 |
| 34 | 6 | 0 | 1.116448  | 3.163583  | -0.000044 |
| 35 | 1 | 0 | 2.013358  | 3.798281  | -0.000261 |
| 36 | 6 | 0 | 0.312974  | 3.500979  | 1.270546  |
| 37 | 1 | 0 | -0.605788 | 2.906285  | 1.332569  |
| 38 | 1 | 0 | 0.026986  | 4.559762  | 1.274960  |
| 39 | 1 | 0 | 0.899453  | 3.302382  | 2.174334  |
| 40 | 6 | 0 | 0.312359  | 3.500878  | -1.270258 |
| 41 | 1 | 0 | 0.898357  | 3.302168  | -2.174335 |
| 42 | 1 | 0 | 0.026391  | 4.559666  | -1.274648 |
| 43 | 1 | 0 | -0.606452 | 2.906200  | -1.331748 |
| 44 | 6 | 0 | 5.375591  | -0.937651 | -1.269734 |
| 45 | 1 | 0 | 4.911209  | -1.929162 | -1.324727 |
| 46 | 1 | 0 | 6.463149  | -1.077798 | -1.277657 |
| 47 | 1 | 0 | 5.095672  | -0.387018 | -2.174547 |
| 48 | 6 | 0 | 5.375708  | -0.937261 | 1.269663  |
| 49 | 1 | 0 | 4.911310  | -1.928748 | 1.325022  |
| 50 | 1 | 0 | 5.095905  | -0.386348 | 2.174344  |
| 51 | 1 | 0 | 6.463265  | -1.077431 | 1.277507  |
| 52 | 8 | 0 | 0.691829  | -2.992192 | 0.000234  |
| 53 | 6 | 0 | -1.957258 | -3.157870 | -0.000055 |
| 54 | 1 | 0 | -1.635608 | -3.716062 | -0.882934 |
| 55 | 1 | 0 | -1.635691 | -3.716030 | 0.882874  |
| 56 | 1 | 0 | -3.049015 | -3.086790 | -0.000104 |

-----

**Compound 2 - Ground State anti**

Method: B3LYP/6-31g(d)

SCF Done: E(RB+HF-LYP) = -1120.99053083 A.U. after 8 cycles

Imaginary frequencies: 0 (12.3)

This molecule is an asymmetric top.

Rotational symmetry number 1.

Warning -- assumption of classical behavior for rotation  
may cause significant error

Rotational temperatures (Kelvin) 0.01200 0.00567 0.00449

Rotational constants (GHZ): 0.25006 0.11805 0.09354

Zero-point vibrational energy 1251193.4 (Joules/Mol)

299.04241 (Kcal/Mol)

Warning -- explicit consideration of 42 degrees of freedom as  
vibrations may cause significant error

Zero-point correction= 0.476554 (Hartree/Particle)

Thermal correction to Energy= 0.502616

Thermal correction to Enthalpy= 0.503560

Thermal correction to Gibbs Free Energy= 0.419017

Sum of electronic and zero-point Energies= -1120.513976

Sum of electronic and thermal Energies= -1120.487915

Sum of electronic and thermal Enthalpies= -1120.486970

Sum of electronic and thermal Free Energies= -1120.571514

## Standard orientation:

| Center<br>Number | Atomic<br>Number | Atomic<br>Type | Coordinates (Angstroms) |           |           |
|------------------|------------------|----------------|-------------------------|-----------|-----------|
|                  |                  |                | X                       | Y         | Z         |
| 1                | 6                | 0              | -2.587655               | -2.277454 | 1.298973  |
| 2                | 1                | 0              | -1.690515               | -2.665927 | 1.774504  |
| 3                | 6                | 0              | -3.769454               | -3.025718 | 1.315813  |
| 4                | 1                | 0              | -3.787607               | -3.992005 | 1.812691  |
| 5                | 6                | 0              | -4.926753               | -2.542184 | 0.695634  |
| 6                | 1                | 0              | -5.837282               | -3.135134 | 0.716500  |
| 7                | 6                | 0              | -4.920683               | -1.305234 | 0.048870  |
| 8                | 1                | 0              | -5.821248               | -0.933436 | -0.433249 |
| 9                | 6                | 0              | -4.254776               | 1.626980  | -1.273438 |
| 10               | 1                | 0              | -5.290334               | 1.373216  | -1.484959 |
| 11               | 6                | 0              | -3.719123               | 2.835446  | -1.724068 |
| 12               | 1                | 0              | -4.341405               | 3.524469  | -2.288884 |
| 13               | 6                | 0              | -2.387460               | 3.161927  | -1.456411 |
| 14               | 1                | 0              | -1.977823               | 4.101912  | -1.816073 |
| 15               | 6                | 0              | -1.432378               | -0.034604 | 0.549525  |
| 16               | 6                | 0              | -1.571020               | 2.285391  | -0.730904 |
| 17               | 1                | 0              | -0.535192               | 2.553391  | -0.547801 |
| 18               | 6                | 0              | -2.578892               | -1.045571 | 0.656020  |
| 19               | 6                | 0              | -2.098195               | 1.081835  | -0.274501 |
| 20               | 6                | 0              | -3.740000               | -0.559609 | 0.032067  |
| 21               | 6                | 0              | -3.441814               | 0.751751  | -0.552559 |
| 22               | 6                | 0              | 1.185851                | -0.310103 | -0.094955 |
| 23               | 6                | 0              | 2.113231                | -1.298244 | -0.465339 |
| 24               | 1                | 0              | 1.723259                | -2.242682 | -0.829969 |
| 25               | 6                | 0              | 1.664388                | 0.930327  | 0.349543  |
| 26               | 1                | 0              | 0.971966                | 1.717285  | 0.618735  |
| 27               | 6                | 0              | -0.266932               | -0.682413 | -0.270507 |
| 28               | 6                | 0              | 3.488643                | -1.078735 | -0.376810 |
| 29               | 6                | 0              | 3.927976                | 0.173406  | 0.073201  |
| 30               | 1                | 0              | 4.998227                | 0.362305  | 0.143311  |
| 31               | 6                | 0              | 3.037834                | 1.191508  | 0.430270  |
| 32               | 6                | 0              | 3.559428                | 2.545185  | 0.898022  |
| 33               | 1                | 0              | 4.656122                | 2.493691  | 0.864159  |
| 34               | 6                | 0              | 4.490359                | -2.159211 | -0.765315 |
| 35               | 1                | 0              | 5.493658                | -1.742229 | -0.601418 |
| 36               | 6                | 0              | 4.381921                | -2.528248 | -2.256985 |
| 37               | 1                | 0              | 3.402435                | -2.961724 | -2.489854 |
| 38               | 1                | 0              | 5.146788                | -3.265987 | -2.527355 |
| 39               | 1                | 0              | 4.516587                | -1.647487 | -2.894275 |
| 40               | 6                | 0              | 4.358590                | -3.408801 | 0.125282  |
| 41               | 1                | 0              | 4.475096                | -3.155710 | 1.184879  |
| 42               | 1                | 0              | 5.123755                | -4.149640 | -0.135108 |
| 43               | 1                | 0              | 3.378638                | -3.884223 | 0.000420  |
| 44               | 6                | 0              | 3.158845                | 2.843897  | 2.355231  |
| 45               | 1                | 0              | 2.070615                | 2.931745  | 2.460258  |
| 46               | 1                | 0              | 3.600893                | 3.789253  | 2.691578  |
| 47               | 1                | 0              | 3.496146                | 2.049998  | 3.030400  |
| 48               | 6                | 0              | 3.125501                | 3.687218  | -0.040074 |
| 49               | 1                | 0              | 2.036428                | 3.817478  | -0.034398 |
| 50               | 1                | 0              | 3.433433                | 3.491918  | -1.072891 |
| 51               | 1                | 0              | 3.572605                | 4.636938  | 0.276622  |
| 52               | 8                | 0              | -0.546403               | -1.557839 | -1.072921 |
| 53               | 6                | 0              | -1.052538               | 0.434176  | 1.976111  |
| 54               | 1                | 0              | -0.542557               | -0.364842 | 2.525510  |

|    |   |   |           |          |          |
|----|---|---|-----------|----------|----------|
| 55 | 1 | 0 | -0.405423 | 1.312030 | 1.981711 |
| 56 | 1 | 0 | -1.965418 | 0.690601 | 2.522144 |

---

**Compound 2 - Transition State Fluorene-CO rotation**

Method: b3lyp/6-31g(d)

SCF Done: E(RB+HF-LYP) = -1120.98969011 A.U. after 8 cycles

Imaginary frequencies: 1 (-25.7)

This molecule is an asymmetric top.

Rotational symmetry number 1.

Warning -- assumption of classical behavior for rotation  
may cause significant error

Rotational temperatures (Kelvin) 0.01227 0.00582 0.00527

Rotational constants (GHZ): 0.25568 0.12118 0.10977

1 imaginary frequencies ignored.

Zero-point vibrational energy 1250457.5 (Joules/Mol)

298.86652 (Kcal/Mol)

Warning -- explicit consideration of 41 degrees of freedom as  
vibrations may cause significant error

Zero-point correction= 0.476274 (Hartree/Particle)

Thermal correction to Energy= 0.501548

Thermal correction to Enthalpy= 0.502492

Thermal correction to Gibbs Free Energy= 0.420329

Sum of electronic and zero-point Energies= -1120.513416

Sum of electronic and thermal Energies= -1120.488142

Sum of electronic and thermal Enthalpies= -1120.487198

Sum of electronic and thermal Free Energies= -1120.569361

Standard orientation:

---

| Center<br>Number | Atomic<br>Number | Atomic<br>Type | Coordinates (Angstroms) |           |           |
|------------------|------------------|----------------|-------------------------|-----------|-----------|
|                  |                  |                | X                       | Y         | Z         |
| 1                | 6                | 0              | 0.462193                | 0.634302  | 1.956320  |
| 2                | 1                | 0              | -0.489534               | 0.116597  | 2.020871  |
| 3                | 6                | 0              | 0.694546                | 1.763222  | 2.751246  |
| 4                | 1                | 0              | -0.081488               | 2.110268  | 3.428203  |
| 5                | 6                | 0              | 1.913097                | 2.444938  | 2.683352  |
| 6                | 1                | 0              | 2.078102                | 3.319922  | 3.306578  |
| 7                | 6                | 0              | 2.923548                | 2.003356  | 1.826817  |
| 8                | 1                | 0              | 3.875606                | 2.526284  | 1.785188  |
| 9                | 6                | 0              | 4.894421                | 0.449889  | -0.285801 |
| 10               | 1                | 0              | 5.428007                | 1.303981  | 0.123527  |
| 11               | 6                | 0              | 5.518589                | -0.399530 | -1.201213 |
| 12               | 1                | 0              | 6.543111                | -0.203482 | -1.506537 |
| 13               | 6                | 0              | 4.835675                | -1.500732 | -1.727843 |
| 14               | 1                | 0              | 5.332843                | -2.151600 | -2.442090 |
| 15               | 6                | 0              | 1.482378                | -1.013068 | 0.149255  |
| 16               | 6                | 0              | 3.515968                | -1.771779 | -1.349124 |
| 17               | 1                | 0              | 2.987598                | -2.616853 | -1.776295 |
| 18               | 6                | 0              | 1.459279                | 0.198400  | 1.088328  |
| 19               | 6                | 0              | 2.891018                | -0.928477 | -0.436044 |
| 20               | 6                | 0              | 2.694359                | 0.877305  | 1.034596  |
| 21               | 6                | 0              | 3.578277                | 0.180115  | 0.093603  |
| 22               | 6                | 0              | -0.995415               | -0.496934 | -0.666152 |



|    |   |   |           |           |           |
|----|---|---|-----------|-----------|-----------|
| 23 | 6 | 0 | -1.937796 | -1.342494 | -0.071556 |
| 24 | 1 | 0 | -1.656238 | -2.355747 | 0.200834  |
| 25 | 6 | 0 | -1.365929 | 0.793830  | -1.057188 |
| 26 | 1 | 0 | -0.626844 | 1.435330  | -1.529229 |
| 27 | 6 | 0 | 0.405340  | -0.974239 | -0.977758 |
| 28 | 6 | 0 | -3.251000 | -0.904810 | 0.148948  |
| 29 | 6 | 0 | -3.587916 | 0.398046  | -0.234596 |
| 30 | 1 | 0 | -4.603609 | 0.750781  | -0.062297 |
| 31 | 6 | 0 | -2.666335 | 1.261799  | -0.839829 |
| 32 | 6 | 0 | -3.077358 | 2.671236  | -1.246025 |
| 33 | 1 | 0 | -4.137643 | 2.784295  | -0.981455 |
| 34 | 6 | 0 | -4.292397 | -1.819707 | 0.781311  |
| 35 | 1 | 0 | -5.225664 | -1.244232 | 0.848342  |
| 36 | 6 | 0 | -3.903743 | -2.232480 | 2.213598  |
| 37 | 1 | 0 | -2.983312 | -2.828548 | 2.221904  |
| 38 | 1 | 0 | -4.695319 | -2.839512 | 2.668698  |
| 39 | 1 | 0 | -3.739857 | -1.354953 | 2.848818  |
| 40 | 6 | 0 | -4.576044 | -3.055884 | -0.093261 |
| 41 | 1 | 0 | -4.887121 | -2.764582 | -1.102197 |
| 42 | 1 | 0 | -5.373200 | -3.665432 | 0.348564  |
| 43 | 1 | 0 | -3.686614 | -3.689996 | -0.188655 |
| 44 | 6 | 0 | -2.955308 | 2.889874  | -2.765923 |
| 45 | 1 | 0 | -1.913509 | 2.811303  | -3.097905 |
| 46 | 1 | 0 | -3.317620 | 3.887504  | -3.041086 |
| 47 | 1 | 0 | -3.539222 | 2.148431  | -3.321899 |
| 48 | 6 | 0 | -2.290143 | 3.742236  | -0.467195 |
| 49 | 1 | 0 | -1.219089 | 3.695006  | -0.695979 |
| 50 | 1 | 0 | -2.404319 | 3.610846  | 0.614333  |
| 51 | 1 | 0 | -2.643568 | 4.746605  | -0.729407 |
| 52 | 8 | 0 | 0.670557  | -1.342587 | -2.104993 |
| 53 | 6 | 0 | 1.280527  | -2.336461 | 0.939496  |
| 54 | 1 | 0 | 0.308427  | -2.355784 | 1.441572  |
| 55 | 1 | 0 | 1.347550  | -3.200850 | 0.270351  |
| 56 | 1 | 0 | 2.059073  | -2.426604 | 1.703021  |

-----

**Compound 2 - Transition State Phenyl-CO rotation of syn conformer**

Method: B3LYP/6-31g(d)

SCF Done: E(RB+HF-LYP) = -1120.99435692 A.U. after 11 cycles

Imaginary frequencies: 1 (-27.1)

This molecule is an asymmetric top.

Rotational symmetry number 1.

Warning -- assumption of classical behavior for rotation  
may cause significant error

Rotational temperatures (Kelvin) 0.00967 0.00887 0.00630

Rotational constants (GHZ): 0.20144 0.18472 0.13122

1 imaginary frequencies ignored.

Zero-point vibrational energy 1250848.5 (Joules/Mol)  
298.95996 (Kcal/Mol)

Warning -- explicit consideration of 41 degrees of freedom as  
vibrations may cause significant error

Zero-point correction= 0.476423 (Hartree/Particle)

Thermal correction to Energy= 0.501614

Thermal correction to Enthalpy= 0.502558

Thermal correction to Gibbs Free Energy= 0.420887  
 Sum of electronic and zero-point Energies= -1120.517934  
 Sum of electronic and thermal Energies= -1120.492743  
 Sum of electronic and thermal Enthalpies= -1120.491799  
 Sum of electronic and thermal Free Energies= -1120.573470

Standard orientation:

| Center<br>Number | Atomic<br>Number | Atomic<br>Type | Coordinates (Angstroms) |           |           |
|------------------|------------------|----------------|-------------------------|-----------|-----------|
|                  |                  |                | X                       | Y         | Z         |
| 1                | 6                | 0              | 2.056514                | 2.540256  | 0.654118  |
| 2                | 1                | 0              | 1.953164                | 2.889906  | 1.678737  |
| 3                | 6                | 0              | 2.203723                | 3.458555  | -0.391893 |
| 4                | 1                | 0              | 2.216028                | 4.523529  | -0.176366 |
| 5                | 6                | 0              | 2.340608                | 3.015304  | -1.712500 |
| 6                | 1                | 0              | 2.453357                | 3.740450  | -2.513978 |
| 7                | 6                | 0              | 2.342274                | 1.650851  | -2.009798 |
| 8                | 1                | 0              | 2.457315                | 1.313902  | -3.036814 |
| 9                | 6                | 0              | 2.340801                | -1.652510 | -2.010004 |
| 10               | 1                | 0              | 2.456177                | -1.315531 | -3.036973 |
| 11               | 6                | 0              | 2.337925                | -3.016997 | -1.712880 |
| 12               | 1                | 0              | 2.450057                | -3.742141 | -2.514447 |
| 13               | 6                | 0              | 2.200635                | -3.460293 | -0.392330 |
| 14               | 1                | 0              | 2.212014                | -4.525303 | -0.176935 |
| 15               | 6                | 0              | 1.912195                | -0.000850 | 1.319888  |
| 16               | 6                | 0              | 2.054212                | -2.541994 | 0.653792  |
| 17               | 1                | 0              | 1.950563                | -2.891688 | 1.678366  |
| 18               | 6                | 0              | 2.049684                | 1.180495  | 0.360548  |
| 19               | 6                | 0              | 2.048558                | -1.182189 | 0.360399  |
| 20               | 6                | 0              | 2.199335                | 0.732707  | -0.967489 |
| 21               | 6                | 0              | 2.198656                | -0.734373 | -0.967580 |
| 22               | 6                | 0              | -0.724136               | 0.000331  | 1.072851  |
| 23               | 6                | 0              | -1.312437               | -1.209422 | 0.690479  |
| 24               | 1                | 0              | -0.854299               | -2.144509 | 0.997681  |
| 25               | 6                | 0              | -1.311568               | 1.210474  | 0.690359  |
| 26               | 1                | 0              | -0.852745               | 2.145256  | 0.997472  |
| 27               | 6                | 0              | 0.495608                | 0.000040  | 1.968664  |
| 28               | 6                | 0              | -2.477373               | -1.224629 | -0.085694 |
| 29               | 6                | 0              | -3.038515               | 0.001091  | -0.462091 |
| 30               | 1                | 0              | -3.942717               | 0.001390  | -1.068977 |
| 31               | 6                | 0              | -2.476472               | 1.226444  | -0.085837 |
| 32               | 6                | 0              | -3.112758               | 2.539020  | -0.525134 |
| 33               | 1                | 0              | -4.026248               | 2.283240  | -1.079508 |
| 34               | 6                | 0              | -3.114669               | -2.536793 | -0.524769 |
| 35               | 1                | 0              | -4.027778               | -2.280387 | -1.079482 |
| 36               | 6                | 0              | -3.534900               | -3.408191 | 0.673444  |
| 37               | 1                | 0              | -2.666050               | -3.725274 | 1.262270  |
| 38               | 1                | 0              | -4.049672               | -4.313158 | 0.329030  |
| 39               | 1                | 0              | -4.210306               | -2.864121 | 1.342523  |
| 40               | 6                | 0              | -2.196795               | -3.319281 | -1.483987 |
| 41               | 1                | 0              | -1.935618               | -2.716345 | -2.360537 |
| 42               | 1                | 0              | -2.692141               | -4.233861 | -1.832124 |
| 43               | 1                | 0              | -1.260907               | -3.609851 | -0.992418 |
| 44               | 6                | 0              | -2.194453               | 3.320384  | -1.484864 |
| 45               | 1                | 0              | -1.258220               | 3.610372  | -0.993603 |
| 46               | 1                | 0              | -2.689119               | 4.235239  | -1.833246 |
| 47               | 1                | 0              | -1.933964               | 2.716898  | -2.361240 |

|    |   |   |           |           |          |
|----|---|---|-----------|-----------|----------|
| 48 | 6 | 0 | -3.531882 | 3.411187  | 0.672904 |
| 49 | 1 | 0 | -2.662604 | 3.727611  | 1.261451 |
| 50 | 1 | 0 | -4.207675 | 2.867978  | 1.342292 |
| 51 | 1 | 0 | -4.045850 | 4.316548  | 0.328324 |
| 52 | 8 | 0 | 0.369707  | 0.000701  | 3.178093 |
| 53 | 6 | 0 | 2.987219  | -0.001445 | 2.420112 |
| 54 | 1 | 0 | 2.886271  | -0.882507 | 3.059955 |
| 55 | 1 | 0 | 3.984219  | -0.001923 | 1.969470 |
| 56 | 1 | 0 | 2.887146  | 0.879629  | 3.060067 |

---

**Compound 3 - Ground State syn**

Method: B3LYP/6-31g(d)  
 SCF Done: E(RB+HF-LYP) = -1199.62296792 A.U. after 6 cycles  
 Imaginary frequencies: 0 (13.5)

This molecule is an asymmetric top.  
 Rotational symmetry number 1.  
 Warning -- assumption of classical behavior for rotation  
 may cause significant error

|                                  |                        |         |         |
|----------------------------------|------------------------|---------|---------|
| Rotational temperatures (Kelvin) | 0.00998                | 0.00606 | 0.00545 |
| Rotational constants (GHZ):      | 0.20794                | 0.12629 | 0.11352 |
| Zero-point vibrational energy    | 1402039.9 (Joules/Mol) |         |         |
|                                  | 335.09559 (Kcal/Mol)   |         |         |

Warning -- explicit consideration of 47 degrees of freedom as  
 vibrations may cause significant error

|                                              |                             |
|----------------------------------------------|-----------------------------|
| Zero-point correction=                       | 0.534009 (Hartree/Particle) |
| Thermal correction to Energy=                | 0.562572                    |
| Thermal correction to Enthalpy=              | 0.563516                    |
| Thermal correction to Gibbs Free Energy=     | 0.474469                    |
| Sum of electronic and zero-point Energies=   | -1199.088959                |
| Sum of electronic and thermal Energies=      | -1199.060396                |
| Sum of electronic and thermal Enthalpies=    | -1199.059452                |
| Sum of electronic and thermal Free Energies= | -1199.148499                |

Standard orientation:

| Center<br>Number | Atomic<br>Number | Atomic<br>Type | Coordinates (Angstroms) |           |           |
|------------------|------------------|----------------|-------------------------|-----------|-----------|
|                  |                  |                | X                       | Y         | Z         |
| 1                | 6                | 0              | 1.114526                | -0.363216 | 2.498385  |
| 2                | 1                | 0              | 0.460803                | -1.169509 | 2.815779  |
| 3                | 6                | 0              | 1.474934                | 0.638914  | 3.407093  |
| 4                | 1                | 0              | 1.108823                | 0.592552  | 4.429107  |
| 5                | 6                | 0              | 2.295294                | 1.699817  | 3.011579  |
| 6                | 1                | 0              | 2.568923                | 2.467874  | 3.729992  |
| 7                | 6                | 0              | 2.755101                | 1.785955  | 1.695153  |
| 8                | 1                | 0              | 3.379536                | 2.620173  | 1.385326  |
| 9                | 6                | 0              | 3.367349                | 1.493004  | -1.528997 |
| 10               | 1                | 0              | 3.855590                | 2.396950  | -1.173494 |
| 11               | 6                | 0              | 3.432524                | 1.141660  | -2.879866 |
| 12               | 1                | 0              | 3.974726                | 1.777219  | -3.574864 |
| 13               | 6                | 0              | 2.801788                | -0.016390 | -3.347353 |
| 14               | 1                | 0              | 2.854826                | -0.270424 | -4.402492 |
| 15               | 6                | 0              | 1.379653                | -1.270518 | 0.030852  |
| 16               | 6                | 0              | 2.098465                | -0.849244 | -2.468899 |
| 17               | 1                | 0              | 1.602659                | -1.745029 | -2.833352 |
| 18               | 6                | 0              | 1.582931                | -0.296175 | 1.188822  |
| 19               | 6                | 0              | 2.038059                | -0.504394 | -1.123475 |
| 20               | 6                | 0              | 2.392271                | 0.790158  | 0.786391  |
| 21               | 6                | 0              | 2.664134                | 0.666239  | -0.650440 |
| 22               | 6                | 0              | -1.200155               | -0.568770 | -0.249820 |
| 23               | 6                | 0              | -0.997498               | 0.817246  | -0.213148 |
| 24               | 1                | 0              | 0.007545                | 1.216525  | -0.244694 |
| 25               | 6                | 0              | -2.510758               | -1.071812 | -0.235079 |
| 26               | 1                | 0              | -2.641686               | -2.147872 | -0.286570 |
| 27               | 6                | 0              | -0.095510               | -1.579747 | -0.375473 |

|    |   |   |           |           |           |
|----|---|---|-----------|-----------|-----------|
| 28 | 6 | 0 | -2.082068 | 1.700352  | -0.166748 |
| 29 | 6 | 0 | -3.373945 | 1.162751  | -0.133944 |
| 30 | 1 | 0 | -4.224183 | 1.842029  | -0.087740 |
| 31 | 6 | 0 | -3.612811 | -0.217909 | -0.164348 |
| 32 | 6 | 0 | -5.036488 | -0.759822 | -0.126113 |
| 33 | 1 | 0 | -5.710170 | 0.107899  | -0.102265 |
| 34 | 6 | 0 | -1.869601 | 3.209213  | -0.146564 |
| 35 | 1 | 0 | -2.865191 | 3.673602  | -0.166786 |
| 36 | 6 | 0 | 2.138923  | -2.639746 | 0.261318  |
| 37 | 1 | 0 | 1.957687  | -3.211892 | -0.653987 |
| 38 | 6 | 0 | 1.579718  | -3.463618 | 1.432594  |
| 39 | 1 | 0 | 2.032879  | -4.461868 | 1.422611  |
| 40 | 1 | 0 | 0.496586  | -3.595893 | 1.366302  |
| 41 | 1 | 0 | 1.823528  | -3.007472 | 2.398289  |
| 42 | 6 | 0 | 3.655735  | -2.465042 | 0.431840  |
| 43 | 1 | 0 | 3.897241  | -1.889156 | 1.332551  |
| 44 | 1 | 0 | 4.116549  | -1.965325 | -0.424871 |
| 45 | 1 | 0 | 4.125534  | -3.450145 | 0.535147  |
| 46 | 6 | 0 | -1.107932 | 3.701952  | -1.391326 |
| 47 | 1 | 0 | -0.091905 | 3.291940  | -1.428451 |
| 48 | 1 | 0 | -1.024799 | 4.795349  | -1.382731 |
| 49 | 1 | 0 | -1.620759 | 3.405968  | -2.313043 |
| 50 | 6 | 0 | -1.173201 | 3.669515  | 1.148484  |
| 51 | 1 | 0 | -1.739491 | 3.359044  | 2.033491  |
| 52 | 1 | 0 | -1.081212 | 4.762306  | 1.168302  |
| 53 | 1 | 0 | -0.165830 | 3.246059  | 1.233365  |
| 54 | 6 | 0 | -5.298301 | -1.582441 | 1.149589  |
| 55 | 1 | 0 | -4.660483 | -2.473566 | 1.184652  |
| 56 | 1 | 0 | -6.341801 | -1.917569 | 1.186065  |
| 57 | 1 | 0 | -5.097501 | -0.992332 | 2.050587  |
| 58 | 6 | 0 | -5.376077 | -1.574237 | -1.388491 |
| 59 | 1 | 0 | -4.746109 | -2.467854 | -1.467195 |
| 60 | 1 | 0 | -5.226197 | -0.979725 | -2.296278 |
| 61 | 1 | 0 | -6.421494 | -1.904381 | -1.364465 |
| 62 | 8 | 0 | -0.353374 | -2.678456 | -0.847546 |

-----

**Compound 3 - Ground State anti**

Method: B3LYP/6-31g(d)

SCF Done: E(RB+HF-LYP) = -1199.61376777 A.U. after 10 cycles

Imaginary frequencies: 0 (14.0)

This molecule is an asymmetric top.

Rotational symmetry number 1.

Warning -- assumption of classical behavior for rotation  
may cause significant error

Rotational temperatures (Kelvin) 0.01047 0.00525 0.00491

Rotational constants (GHZ): 0.21813 0.10932 0.10226

Zero-point vibrational energy 1400976.4 (Joules/Mol)  
334.84141 (Kcal/Mol)

Warning -- explicit consideration of 47 degrees of freedom as  
vibrations may cause significant error

Zero-point correction= 0.533604 (Hartree/Particle)

Thermal correction to Energy= 0.562329

Thermal correction to Enthalpy= 0.563274

Thermal correction to Gibbs Free Energy= 0.473391  
 Sum of electronic and zero-point Energies= -1199.080164  
 Sum of electronic and thermal Energies= -1199.051438  
 Sum of electronic and thermal Enthalpies= -1199.050494  
 Sum of electronic and thermal Free Energies= -1199.140377

Standard orientation:

| Center<br>Number | Atomic<br>Number | Atomic<br>Type | Coordinates (Angstroms) |           |           |
|------------------|------------------|----------------|-------------------------|-----------|-----------|
|                  |                  |                | X                       | Y         | Z         |
| 1                | 6                | 0              | 3.337359                | -0.292505 | -2.076270 |
| 2                | 1                | 0              | 2.797818                | 0.025902  | -2.960526 |
| 3                | 6                | 0              | 4.598769                | -0.882961 | -2.209431 |
| 4                | 1                | 0              | 5.037171                | -0.990115 | -3.198044 |
| 5                | 6                | 0              | 5.292959                | -1.348745 | -1.088442 |
| 6                | 1                | 0              | 6.270712                | -1.807663 | -1.209362 |
| 7                | 6                | 0              | 4.730212                | -1.238034 | 0.183354  |
| 8                | 1                | 0              | 5.262112                | -1.611790 | 1.054640  |
| 9                | 6                | 0              | 2.916151                | -0.721040 | 2.850220  |
| 10               | 1                | 0              | 3.841365                | -1.213503 | 3.138384  |
| 11               | 6                | 0              | 1.969513                | -0.376857 | 3.817227  |
| 12               | 1                | 0              | 2.156542                | -0.607636 | 4.862672  |
| 13               | 6                | 0              | 0.785850                | 0.267077  | 3.447673  |
| 14               | 1                | 0              | 0.055926                | 0.534171  | 4.207159  |
| 15               | 6                | 0              | 1.442014                | 0.467414  | -0.386139 |
| 16               | 6                | 0              | 0.526578                | 0.571669  | 2.105545  |
| 17               | 1                | 0              | -0.400842               | 1.067600  | 1.839663  |
| 18               | 6                | 0              | 2.779088                | -0.155727 | -0.807379 |
| 19               | 6                | 0              | 1.460147                | 0.221007  | 1.134013  |
| 20               | 6                | 0              | 3.473396                | -0.644357 | 0.315569  |
| 21               | 6                | 0              | 2.658175                | -0.418922 | 1.512575  |
| 22               | 6                | 0              | -1.169306               | -0.203014 | -0.622702 |
| 23               | 6                | 0              | -1.883744               | -1.408853 | -0.553793 |
| 24               | 1                | 0              | -1.356058               | -2.329757 | -0.780596 |
| 25               | 6                | 0              | -1.842546               | 1.000375  | -0.372298 |
| 26               | 1                | 0              | -1.319617               | 1.945035  | -0.459158 |
| 27               | 6                | 0              | 0.271252                | -0.320502 | -1.067324 |
| 28               | 6                | 0              | -3.235453               | -1.434160 | -0.202991 |
| 29               | 6                | 0              | -3.876219               | -0.212893 | 0.042600  |
| 30               | 1                | 0              | -4.932739               | -0.215882 | 0.306500  |
| 31               | 6                | 0              | -3.205943               | 1.011281  | -0.049410 |
| 32               | 6                | 0              | -3.950843               | 2.320384  | 0.184388  |
| 33               | 1                | 0              | -4.984986               | 2.057403  | 0.445003  |
| 34               | 6                | 0              | -4.001842               | -2.746846 | -0.099363 |
| 35               | 1                | 0              | -5.031690               | -2.496118 | 0.189956  |
| 36               | 6                | 0              | -3.423407               | -3.661425 | 0.996791  |
| 37               | 1                | 0              | -2.394826               | -3.960120 | 0.763293  |
| 38               | 1                | 0              | -4.022530               | -4.574816 | 1.091816  |
| 39               | 1                | 0              | -3.411728               | -3.157629 | 1.969511  |
| 40               | 6                | 0              | -4.067658               | -3.478591 | -1.453459 |
| 41               | 1                | 0              | -4.514789               | -2.843822 | -2.226221 |
| 42               | 1                | 0              | -4.670481               | -4.390634 | -1.368993 |
| 43               | 1                | 0              | -3.068578               | -3.769639 | -1.798070 |
| 44               | 6                | 0              | -4.003637               | 3.183508  | -1.090719 |
| 45               | 1                | 0              | -3.000019               | 3.497940  | -1.401304 |
| 46               | 1                | 0              | -4.597395               | 4.089230  | -0.919181 |
| 47               | 1                | 0              | -4.453153               | 2.632666  | -1.923922 |

|    |   |   |           |           |           |
|----|---|---|-----------|-----------|-----------|
| 48 | 6 | 0 | -3.368928 | 3.116905  | 1.367268  |
| 49 | 1 | 0 | -2.336574 | 3.430546  | 1.170190  |
| 50 | 1 | 0 | -3.368431 | 2.519744  | 2.285850  |
| 51 | 1 | 0 | -3.959164 | 4.022633  | 1.550226  |
| 52 | 8 | 0 | 0.520012  | -1.122059 | -1.951536 |
| 53 | 6 | 0 | 1.371905  | 2.019481  | -0.687153 |
| 54 | 1 | 0 | 0.538691  | 2.401924  | -0.087079 |
| 55 | 6 | 0 | 1.087469  | 2.353401  | -2.160022 |
| 56 | 1 | 0 | 0.957936  | 3.435904  | -2.276343 |
| 57 | 1 | 0 | 1.920135  | 2.054760  | -2.804713 |
| 58 | 1 | 0 | 0.180964  | 1.866977  | -2.536042 |
| 59 | 6 | 0 | 2.629837  | 2.760733  | -0.205717 |
| 60 | 1 | 0 | 3.507694  | 2.483774  | -0.797860 |
| 61 | 1 | 0 | 2.481750  | 3.842264  | -0.308545 |
| 62 | 1 | 0 | 2.847813  | 2.550311  | 0.845723  |

**Compound 3 - Transition State Phenyl-CO rotation of syn conformer**

Method: B3LYP/6-31g(d)

SCF Done: E(RB+HF-LYP) = -1199.61636314 A.U. after 7 cycles

Imaginary frequencies: 1 (-16.4)

This molecule is an asymmetric top.

Rotational symmetry number 1.

Warning -- assumption of classical behavior for rotation  
may cause significant error

Rotational temperatures (Kelvin) 0.00904 0.00721 0.00564

Rotational constants (GHZ): 0.18830 0.15022 0.11748

1 imaginary frequencies ignored.

Zero-point vibrational energy 1400289.0 (Joules/Mol)

334.67711 (Kcal/Mol)

Warning -- explicit consideration of 45 degrees of freedom as  
vibrations may cause significant error

Zero-point correction= 0.533342 (Hartree/Particle)

Thermal correction to Energy= 0.561263

Thermal correction to Enthalpy= 0.562207

Thermal correction to Gibbs Free Energy= 0.475289

Sum of electronic and zero-point Energies= -1199.083021

Sum of electronic and thermal Energies= -1199.055100

Sum of electronic and thermal Enthalpies= -1199.054156

Sum of electronic and thermal Free Energies= -1199.141074

Standard orientation:

| Center<br>Number | Atomic<br>Number | Atomic<br>Type | Coordinates (Angstroms) |           |           |
|------------------|------------------|----------------|-------------------------|-----------|-----------|
|                  |                  |                | X                       | Y         | Z         |
| 1                | 6                | 0              | 1.023694                | -2.627469 | 0.590850  |
| 2                | 1                | 0              | 0.825456                | -3.253170 | -0.273387 |
| 3                | 6                | 0              | 0.851455                | -3.152898 | 1.876457  |
| 4                | 1                | 0              | 0.533087                | -4.185071 | 1.995192  |
| 5                | 6                | 0              | 1.082960                | -2.363045 | 3.007043  |
| 6                | 1                | 0              | 0.943935                | -2.785223 | 3.998680  |
| 7                | 6                | 0              | 1.486572                | -1.034586 | 2.868721  |
| 8                | 1                | 0              | 1.658954                | -0.418835 | 3.747795  |

|    |   |   |           |           |           |
|----|---|---|-----------|-----------|-----------|
| 9  | 6 | 0 | 2.384702  | 1.974170  | 1.896371  |
| 10 | 1 | 0 | 2.358217  | 1.961203  | 2.982920  |
| 11 | 6 | 0 | 2.737398  | 3.140801  | 1.214195  |
| 12 | 1 | 0 | 2.988369  | 4.036913  | 1.775429  |
| 13 | 6 | 0 | 2.770596  | 3.167653  | -0.185052 |
| 14 | 1 | 0 | 3.046187  | 4.083530  | -0.700679 |
| 15 | 6 | 0 | 1.719838  | -0.507701 | -0.832959 |
| 16 | 6 | 0 | 2.449465  | 2.024534  | -0.926121 |
| 17 | 1 | 0 | 2.464103  | 2.050467  | -2.012742 |
| 18 | 6 | 0 | 1.438823  | -1.305295 | 0.440823  |
| 19 | 6 | 0 | 2.103375  | 0.859936  | -0.247238 |
| 20 | 6 | 0 | 1.662564  | -0.511007 | 1.586584  |
| 21 | 6 | 0 | 2.065706  | 0.831559  | 1.159428  |
| 22 | 6 | 0 | -0.870034 | 0.037946  | -0.994264 |
| 23 | 6 | 0 | -1.243291 | 1.349403  | -0.683348 |
| 24 | 1 | 0 | -0.555364 | 2.161571  | -0.897795 |
| 25 | 6 | 0 | -1.752347 | -1.015870 | -0.738489 |
| 26 | 1 | 0 | -1.460979 | -2.030375 | -0.994540 |
| 27 | 6 | 0 | 0.450814  | -0.212902 | -1.688753 |
| 28 | 6 | 0 | -2.487564 | 1.619206  | -0.101055 |
| 29 | 6 | 0 | -3.348230 | 0.544917  | 0.150543  |
| 30 | 1 | 0 | -4.318948 | 0.742728  | 0.602734  |
| 31 | 6 | 0 | -3.005254 | -0.775799 | -0.162409 |
| 32 | 6 | 0 | -3.970849 | -1.917004 | 0.131757  |
| 33 | 1 | 0 | -4.889162 | -1.465194 | 0.531190  |
| 34 | 6 | 0 | -2.898251 | 3.043477  | 0.250628  |
| 35 | 1 | 0 | -3.913226 | 2.991930  | 0.668177  |
| 36 | 6 | 0 | 2.868523  | -1.078523 | -1.736354 |
| 37 | 1 | 0 | 2.969523  | -0.353000 | -2.551329 |
| 38 | 6 | 0 | 2.540758  | -2.434420 | -2.383434 |
| 39 | 1 | 0 | 3.298429  | -2.667881 | -3.140541 |
| 40 | 1 | 0 | 1.568676  | -2.429250 | -2.883733 |
| 41 | 1 | 0 | 2.560353  | -3.246959 | -1.649193 |
| 42 | 6 | 0 | 4.211636  | -1.165400 | -0.994991 |
| 43 | 1 | 0 | 4.162664  | -1.878475 | -0.163990 |
| 44 | 1 | 0 | 4.525880  | -0.197489 | -0.593274 |
| 45 | 1 | 0 | 4.992145  | -1.511685 | -1.682566 |
| 46 | 6 | 0 | -2.958556 | 3.948803  | -0.994104 |
| 47 | 1 | 0 | -1.969337 | 4.063456  | -1.452609 |
| 48 | 1 | 0 | -3.318603 | 4.949351  | -0.725945 |
| 49 | 1 | 0 | -3.631454 | 3.535180  | -1.753082 |
| 50 | 6 | 0 | -1.984045 | 3.649303  | 1.332837  |
| 51 | 1 | 0 | -1.979654 | 3.031368  | 2.237479  |
| 52 | 1 | 0 | -2.324991 | 4.655036  | 1.606973  |
| 53 | 1 | 0 | -0.948787 | 3.730307  | 0.981419  |
| 54 | 6 | 0 | -3.416166 | -2.864734 | 1.212612  |
| 55 | 1 | 0 | -2.489381 | -3.347055 | 0.880421  |
| 56 | 1 | 0 | -4.142128 | -3.653451 | 1.444384  |
| 57 | 1 | 0 | -3.191675 | -2.322136 | 2.137235  |
| 58 | 6 | 0 | -4.357068 | -2.693934 | -1.140705 |
| 59 | 1 | 0 | -3.487891 | -3.194298 | -1.583974 |
| 60 | 1 | 0 | -4.780535 | -2.027408 | -1.899818 |
| 61 | 1 | 0 | -5.100868 | -3.465798 | -0.909297 |
| 62 | 8 | 0 | 0.532959  | -0.093378 | -2.897370 |

---



**Compound 3 - Transition State isopropyl rotation**

Method: B3LYP/6-31g(d)  
 SCF Done: E(RB+HF-LYP) = -1199.61049457 A.U. after 8 cycles  
 Imaginary frequencies: 1 (-76.4)

This molecule is an asymmetric top.

Rotational symmetry number 1.

Warning -- assumption of classical behavior for rotation  
 may cause significant error

|                                  |         |         |         |
|----------------------------------|---------|---------|---------|
| Rotational temperatures (Kelvin) | 0.00994 | 0.00608 | 0.00551 |
| Rotational constants (GHZ):      | 0.20708 | 0.12677 | 0.11486 |

1 imaginary frequencies ignored.

|                               |                        |
|-------------------------------|------------------------|
| Zero-point vibrational energy | 1402700.7 (Joules/Mol) |
|                               | 335.25351 (Kcal/Mol)   |

Warning -- explicit consideration of 47 degrees of freedom as  
 vibrations may cause significant error

|                                              |                             |
|----------------------------------------------|-----------------------------|
| Zero-point correction=                       | 0.534260 (Hartree/Particle) |
| Thermal correction to Energy=                | 0.561805                    |
| Thermal correction to Enthalpy=              | 0.562750                    |
| Thermal correction to Gibbs Free Energy=     | 0.476399                    |
| Sum of electronic and zero-point Energies=   | -1199.076234                |
| Sum of electronic and thermal Energies=      | -1199.048689                |
| Sum of electronic and thermal Enthalpies=    | -1199.047745                |
| Sum of electronic and thermal Free Energies= | -1199.134096                |

Standard orientation:

| Center Number | Atomic Number | Atomic Type | Coordinates (Angstroms) |           |           |
|---------------|---------------|-------------|-------------------------|-----------|-----------|
|               |               |             | X                       | Y         | Z         |
| 1             | 6             | 0           | 1.073832                | -0.428120 | 2.539088  |
| 2             | 1             | 0           | 0.436178                | -1.260976 | 2.822831  |
| 3             | 6             | 0           | 1.387654                | 0.560035  | 3.478681  |
| 4             | 1             | 0           | 0.997928                | 0.482150  | 4.489953  |
| 5             | 6             | 0           | 2.194498                | 1.646873  | 3.127146  |
| 6             | 1             | 0           | 2.435780                | 2.402920  | 3.869470  |
| 7             | 6             | 0           | 2.675400                | 1.777735  | 1.822146  |
| 8             | 1             | 0           | 3.278335                | 2.638254  | 1.543147  |
| 9             | 6             | 0           | 3.206324                | 1.663778  | -1.421007 |
| 10            | 1             | 0           | 3.689194                | 2.554669  | -1.027396 |
| 11            | 6             | 0           | 3.173179                | 1.430022  | -2.798136 |
| 12            | 1             | 0           | 3.643937                | 2.137077  | -3.475895 |
| 13            | 6             | 0           | 2.520635                | 0.304893  | -3.311773 |
| 14            | 1             | 0           | 2.480016                | 0.147902  | -4.386135 |
| 15            | 6             | 0           | 1.413115                | -1.277733 | 0.058845  |
| 16            | 6             | 0           | 1.913559                | -0.620215 | -2.454609 |
| 17            | 1             | 0           | 1.398096                | -1.485999 | -2.861209 |
| 18            | 6             | 0           | 1.572016                | -0.321016 | 1.244011  |
| 19            | 6             | 0           | 1.969308                | -0.408404 | -1.080702 |
| 20            | 6             | 0           | 2.351153                | 0.798000  | 0.881538  |
| 21            | 6             | 0           | 2.591149                | 0.747805  | -0.565257 |
| 22            | 6             | 0           | -1.187147               | -0.635497 | -0.202792 |
| 23            | 6             | 0           | -1.002145               | 0.753657  | -0.219240 |
| 24            | 1             | 0           | -0.003339               | 1.164793  | -0.269152 |
| 25            | 6             | 0           | -2.493042               | -1.150585 | -0.161107 |
| 26            | 1             | 0           | -2.612285               | -2.228987 | -0.166087 |

|    |   |   |           |           |           |
|----|---|---|-----------|-----------|-----------|
| 27 | 6 | 0 | -0.074453 | -1.646911 | -0.272424 |
| 28 | 6 | 0 | -2.096334 | 1.625612  | -0.198537 |
| 29 | 6 | 0 | -3.382216 | 1.075900  | -0.142092 |
| 30 | 1 | 0 | -4.239870 | 1.746945  | -0.117584 |
| 31 | 6 | 0 | -3.604691 | -0.307345 | -0.119854 |
| 32 | 6 | 0 | -5.021737 | -0.864306 | -0.057796 |
| 33 | 1 | 0 | -5.704940 | -0.003796 | -0.045094 |
| 34 | 6 | 0 | -1.900150 | 3.136756  | -0.224709 |
| 35 | 1 | 0 | -2.900243 | 3.589068  | -0.275366 |
| 36 | 6 | 0 | 2.250521  | -2.643099 | 0.258193  |
| 37 | 1 | 0 | 1.505710  | -3.433173 | 0.140659  |
| 38 | 6 | 0 | 2.890051  | -2.813302 | 1.646815  |
| 39 | 1 | 0 | 3.383451  | -3.791648 | 1.687960  |
| 40 | 1 | 0 | 2.159326  | -2.784995 | 2.458866  |
| 41 | 1 | 0 | 3.648843  | -2.050095 | 1.853406  |
| 42 | 6 | 0 | 3.330372  | -2.895493 | -0.807615 |
| 43 | 1 | 0 | 4.114500  | -2.129905 | -0.792658 |
| 44 | 1 | 0 | 2.921773  | -2.937380 | -1.819845 |
| 45 | 1 | 0 | 3.805980  | -3.863039 | -0.607782 |
| 46 | 6 | 0 | -1.123353 | 3.599963  | -1.471310 |
| 47 | 1 | 0 | -0.101745 | 3.202501  | -1.479900 |
| 48 | 1 | 0 | -1.054136 | 4.694122  | -1.495067 |
| 49 | 1 | 0 | -1.617378 | 3.269519  | -2.391609 |
| 50 | 6 | 0 | -1.230656 | 3.644038  | 1.067135  |
| 51 | 1 | 0 | -1.810737 | 3.357758  | 1.951384  |
| 52 | 1 | 0 | -1.146350 | 4.737560  | 1.053672  |
| 53 | 1 | 0 | -0.222386 | 3.230245  | 1.183402  |
| 54 | 6 | 0 | -5.264506 | -1.664971 | 1.235376  |
| 55 | 1 | 0 | -4.617702 | -2.548970 | 1.282452  |
| 56 | 1 | 0 | -6.304217 | -2.009723 | 1.286774  |
| 57 | 1 | 0 | -5.062515 | -1.055584 | 2.123167  |
| 58 | 6 | 0 | -5.362270 | -1.706258 | -1.301781 |
| 59 | 1 | 0 | -4.721398 | -2.593050 | -1.369618 |
| 60 | 1 | 0 | -5.227968 | -1.126744 | -2.221669 |
| 61 | 1 | 0 | -6.403158 | -2.049065 | -1.262439 |
| 62 | 8 | 0 | -0.346134 | -2.786653 | -0.621505 |

---

**Compound 4 - Ground State syn**

Method: B3LYP/6-31g(d)  
 SCF Done: E(RB+HF-LYP) = -1003.05385494 A.U. after 9 cycles  
 Imaginary frequencies: 0 (23.5)

This molecule is an asymmetric top.  
 Rotational symmetry number 1.  
 Warning -- assumption of classical behavior for rotation  
 may cause significant error

|                                  |                        |         |         |
|----------------------------------|------------------------|---------|---------|
| Rotational temperatures (Kelvin) | 0.01730                | 0.00871 | 0.00769 |
| Rotational constants (GHZ):      | 0.36050                | 0.18145 | 0.16017 |
| Zero-point vibrational energy    | 1024271.0 (Joules/Mol) |         |         |
|                                  | 244.80664 (Kcal/Mol)   |         |         |

Warning -- explicit consideration of 36 degrees of freedom as  
 vibrations may cause significant error

|                                              |                             |
|----------------------------------------------|-----------------------------|
| Zero-point correction=                       | 0.390124 (Hartree/Particle) |
| Thermal correction to Energy=                | 0.412485                    |
| Thermal correction to Enthalpy=              | 0.413429                    |
| Thermal correction to Gibbs Free Energy=     | 0.338468                    |
| Sum of electronic and zero-point Energies=   | -1002.663731                |
| Sum of electronic and thermal Energies=      | -1002.641370                |
| Sum of electronic and thermal Enthalpies=    | -1002.640426                |
| Sum of electronic and thermal Free Energies= | -1002.715387                |

Standard orientation:

| Center<br>Number | Atomic<br>Number | Atomic<br>Type | Coordinates (Angstroms) |           |           |
|------------------|------------------|----------------|-------------------------|-----------|-----------|
|                  |                  |                | X                       | Y         | Z         |
| 1                | 6                | 0              | -2.923028               | -1.788262 | -0.222846 |
| 2                | 1                | 0              | -2.565762               | -2.763889 | 0.091147  |
| 3                | 6                | 0              | -4.086953               | -1.663041 | -0.990913 |
| 4                | 1                | 0              | -4.645350               | -2.553238 | -1.267717 |
| 5                | 6                | 0              | -4.537216               | -0.404951 | -1.405148 |
| 6                | 1                | 0              | -5.444105               | -0.325678 | -1.998810 |
| 7                | 6                | 0              | -3.829812               | 0.750729  | -1.066016 |
| 8                | 1                | 0              | -4.181685               | 1.725556  | -1.394278 |
| 9                | 6                | 0              | -1.726616               | 3.034520  | 0.034752  |
| 10               | 1                | 0              | -2.518088               | 3.533781  | -0.518455 |
| 11               | 6                | 0              | -0.694465               | 3.776276  | 0.612736  |
| 12               | 1                | 0              | -0.682228               | 4.857630  | 0.504956  |
| 13               | 6                | 0              | 0.322131                | 3.139157  | 1.331973  |
| 14               | 1                | 0              | 1.119287                | 3.728653  | 1.776664  |
| 15               | 6                | 0              | -0.958731               | -0.498584 | 0.977234  |
| 16               | 6                | 0              | 0.322771                | 1.748147  | 1.484402  |
| 17               | 1                | 0              | 1.120118                | 1.265064  | 2.042356  |
| 18               | 6                | 0              | -2.220390               | -0.637969 | 0.119010  |
| 19               | 6                | 0              | -0.696902               | 1.001358  | 0.902723  |
| 20               | 6                | 0              | -2.665768               | 0.629841  | -0.304634 |
| 21               | 6                | 0              | -1.724892               | 1.645883  | 0.182765  |
| 22               | 6                | 0              | 1.483266                | -0.936052 | -0.059465 |
| 23               | 6                | 0              | 1.577617                | -0.338178 | -1.329965 |
| 24               | 6                | 0              | 2.644372                | -1.153613 | 0.715414  |
| 25               | 6                | 0              | 0.166208                | -1.455170 | 0.471881  |
| 26               | 6                | 0              | 2.836023                | 0.065325  | -1.790802 |
| 27               | 6                | 0              | 3.992888                | -0.093240 | -1.026829 |

|    |   |   |           |           |           |
|----|---|---|-----------|-----------|-----------|
| 28 | 6 | 0 | 3.873664  | -0.711092 | 0.222360  |
| 29 | 8 | 0 | -0.013415 | -2.656642 | 0.576167  |
| 30 | 6 | 0 | -1.269826 | -0.913047 | 2.444254  |
| 31 | 1 | 0 | -1.499900 | -1.980031 | 2.488370  |
| 32 | 1 | 0 | -0.413904 | -0.712835 | 3.098417  |
| 33 | 1 | 0 | -2.125149 | -0.341370 | 2.815824  |
| 34 | 1 | 0 | 4.766108  | -0.869012 | 0.825015  |
| 35 | 1 | 0 | 2.909036  | 0.511751  | -2.780770 |
| 36 | 6 | 0 | 2.592378  | -1.865358 | 2.051007  |
| 37 | 1 | 0 | 1.893226  | -1.389648 | 2.749672  |
| 38 | 1 | 0 | 2.263574  | -2.902918 | 1.932860  |
| 39 | 1 | 0 | 3.578997  | -1.869353 | 2.523678  |
| 40 | 6 | 0 | 0.372323  | -0.144416 | -2.222579 |
| 41 | 1 | 0 | -0.336936 | -0.974903 | -2.150246 |
| 42 | 1 | 0 | -0.171729 | 0.772103  | -1.966569 |
| 43 | 1 | 0 | 0.681008  | -0.060842 | -3.269476 |
| 44 | 6 | 0 | 5.332438  | 0.393333  | -1.527558 |
| 45 | 1 | 0 | 5.554912  | 1.400789  | -1.150809 |
| 46 | 1 | 0 | 6.146598  | -0.261531 | -1.198222 |
| 47 | 1 | 0 | 5.357593  | 0.442422  | -2.621143 |

-----

**Compound 4 - Transition State Phenyl-CO rotation 0° (correlated)**

Method: B3LYP/6-31g(d)

SCF Done: E(RB+HF-LYP) = -1003.03483411 A.U. after 16 cycles

Imaginary frequencies: 1 (-80.0)

This molecule is an asymmetric top.

Rotational symmetry number 1.

Warning -- assumption of classical behavior for rotation  
may cause significant error

Rotational temperatures (Kelvin) 0.01585 0.00809 0.00757

Rotational constants (GHZ): 0.33020 0.16863 0.15771

1 imaginary frequencies ignored.

Zero-point vibrational energy 1027861.6 (Joules/Mol)  
245.66481 (Kcal/Mol)

Warning -- explicit consideration of 36 degrees of freedom as  
vibrations may cause significant error

Zero-point correction= 0.391492 (Hartree/Particle)

Thermal correction to Energy= 0.412262

Thermal correction to Enthalpy= 0.413206

Thermal correction to Gibbs Free Energy= 0.341260

Sum of electronic and zero-point Energies= -1002.643342

Sum of electronic and thermal Energies= -1002.622573

Sum of electronic and thermal Enthalpies= -1002.621628

Sum of electronic and thermal Free Energies= -1002.693574

standard orientation:

| Center<br>Number | Atomic<br>Number | Atomic<br>Type | Coordinates (Angstroms) |           |           |
|------------------|------------------|----------------|-------------------------|-----------|-----------|
|                  |                  |                | X                       | Y         | Z         |
| 1                | 6                | 0              | -1.801465               | -1.068019 | -2.527831 |
| 2                | 1                | 0              | -0.965787               | -1.677386 | -2.863087 |
| 3                | 6                | 0              | -2.631128               | -0.431330 | -3.459371 |

|    |   |   |           |           |           |
|----|---|---|-----------|-----------|-----------|
| 4  | 1 | 0 | -2.432065 | -0.543295 | -4.521716 |
| 5  | 6 | 0 | -3.715466 | 0.343344  | -3.034513 |
| 6  | 1 | 0 | -4.352567 | 0.826704  | -3.770305 |
| 7  | 6 | 0 | -3.986421 | 0.504483  | -1.672950 |
| 8  | 1 | 0 | -4.828932 | 1.111062  | -1.350277 |
| 9  | 6 | 0 | -3.992490 | 0.566312  | 1.631790  |
| 10 | 1 | 0 | -4.832827 | 1.161568  | 1.283339  |
| 11 | 6 | 0 | -3.727532 | 0.455772  | 2.999573  |
| 12 | 1 | 0 | -4.366811 | 0.967230  | 3.714175  |
| 13 | 6 | 0 | -2.646730 | -0.304917 | 3.457552  |
| 14 | 1 | 0 | -2.452640 | -0.378194 | 4.524192  |
| 15 | 6 | 0 | -1.390436 | -1.569195 | 0.024053  |
| 16 | 6 | 0 | -1.814303 | -0.977017 | 2.553666  |
| 17 | 1 | 0 | -0.981328 | -1.574999 | 2.915192  |
| 18 | 6 | 0 | -2.062839 | -0.902374 | -1.173100 |
| 19 | 6 | 0 | -2.068512 | -0.859828 | 1.192468  |
| 20 | 6 | 0 | -3.153875 | -0.116650 | -0.740691 |
| 21 | 6 | 0 | -3.156783 | -0.089863 | 0.726872  |
| 22 | 6 | 0 | 1.227921  | -0.543529 | 0.011187  |
| 23 | 6 | 0 | 0.977482  | 0.862705  | 0.008253  |
| 24 | 6 | 0 | 2.606607  | -0.968947 | 0.003877  |
| 25 | 6 | 0 | 0.188786  | -1.655417 | 0.020981  |
| 26 | 6 | 0 | 2.051407  | 1.761887  | -0.007938 |
| 27 | 6 | 0 | 3.381062  | 1.358954  | -0.022196 |
| 28 | 6 | 0 | 3.624496  | -0.011843 | -0.011708 |
| 29 | 8 | 0 | 0.603775  | -2.807941 | 0.021025  |
| 30 | 6 | 0 | -1.920885 | -3.038952 | 0.050940  |
| 31 | 1 | 0 | -1.575734 | -3.593327 | -0.824039 |
| 32 | 1 | 0 | -1.572188 | -3.561251 | 0.944402  |
| 33 | 1 | 0 | -3.014701 | -3.019848 | 0.053220  |
| 34 | 1 | 0 | 4.654891  | -0.359440 | -0.014854 |
| 35 | 1 | 0 | 1.827135  | 2.825800  | -0.008700 |
| 36 | 6 | 0 | 3.108461  | -2.401229 | 0.014926  |
| 37 | 1 | 0 | 2.764323  | -2.956491 | 0.891028  |
| 38 | 1 | 0 | 2.763226  | -2.970334 | -0.851874 |
| 39 | 1 | 0 | 4.204035  | -2.396503 | 0.014058  |
| 40 | 6 | 0 | -0.377825 | 1.526208  | 0.027050  |
| 41 | 1 | 0 | -0.255689 | 2.612046  | -0.016245 |
| 42 | 1 | 0 | -0.993827 | 1.235411  | -0.824257 |
| 43 | 1 | 0 | -0.936122 | 1.298516  | 0.936687  |
| 44 | 6 | 0 | 4.511204  | 2.357043  | -0.067505 |
| 45 | 1 | 0 | 5.340403  | 2.052072  | 0.580668  |
| 46 | 1 | 0 | 4.914733  | 2.448787  | -1.084724 |
| 47 | 1 | 0 | 4.180586  | 3.352476  | 0.245672  |

-----

**Compound 4 - Transition State Phenyl-CO rotation 90° (correlated)**

Method: B3LYP/6-31g(d)

SCF Done: E(RB+HF-LYP) = -1003.04706022 A.U. after 17 cycles

Imaginary frequencies: 1 (-20.0)

This molecule is an asymmetric top.

Rotational symmetry number 1.

Warning -- assumption of classical behavior for rotation  
may cause significant error

Rotational temperatures (Kelvin) 0.01335 0.01089 0.00897  
Rotational constants (GHZ): 0.27819 0.22689 0.18691

1 imaginary frequencies ignored.

Zero-point vibrational energy 1025675.4 (Joules/Mol)  
245.14230 (Kcal/Mol)

Warning -- explicit consideration of 36 degrees of freedom as  
vibrations may cause significant error

Zero-point correction= 0.390659 (Hartree/Particle)  
Thermal correction to Energy= 0.411789  
Thermal correction to Enthalpy= 0.412733  
Thermal correction to Gibbs Free Energy= 0.342031  
Sum of electronic and zero-point Energies= -1002.656401  
Sum of electronic and thermal Energies= -1002.635272  
Sum of electronic and thermal Enthalpies= -1002.634327  
Sum of electronic and thermal Free Energies= -1002.705029

Input orientation:

| Center<br>Number | Atomic<br>Number | Atomic<br>Type | Coordinates (Angstroms) |           |           |
|------------------|------------------|----------------|-------------------------|-----------|-----------|
|                  |                  |                | X                       | Y         | Z         |
| 1                | 6                | 0              | 2.248366                | 2.530396  | 0.596734  |
| 2                | 1                | 0              | 2.224964                | 2.882727  | 1.624421  |
| 3                | 6                | 0              | 2.436829                | 3.440829  | -0.449699 |
| 4                | 1                | 0              | 2.559021                | 4.497534  | -0.227685 |
| 5                | 6                | 0              | 2.472962                | 3.000677  | -1.777082 |
| 6                | 1                | 0              | 2.614462                | 3.719813  | -2.579468 |
| 7                | 6                | 0              | 2.356260                | 1.642078  | -2.077743 |
| 8                | 1                | 0              | 2.419930                | 1.300708  | -3.107715 |
| 9                | 6                | 0              | 2.354463                | -1.644263 | -2.077738 |
| 10               | 1                | 0              | 2.418523                | -1.302962 | -3.107709 |
| 11               | 6                | 0              | 2.469589                | -3.002997 | -1.777083 |
| 12               | 1                | 0              | 2.610287                | -3.722292 | -2.579467 |
| 13               | 6                | 0              | 2.432922                | -3.443106 | -0.449703 |
| 14               | 1                | 0              | 2.553920                | -4.499947 | -0.227684 |
| 15               | 6                | 0              | 1.938771                | -0.000861 | 1.263502  |
| 16               | 6                | 0              | 2.245441                | -2.532465 | 0.596732  |
| 17               | 1                | 0              | 2.221638                | -2.884773 | 1.624417  |
| 18               | 6                | 0              | 2.100136                | 1.179167  | 0.301758  |
| 19               | 6                | 0              | 2.098772                | -1.181065 | 0.301763  |
| 20               | 6                | 0              | 2.186731                | 0.731908  | -1.032817 |
| 21               | 6                | 0              | 2.185940                | -0.733907 | -1.032812 |
| 22               | 6                | 0              | -0.753304               | 0.000512  | 1.094051  |
| 23               | 6                | 0              | -1.381198               | -1.218661 | 0.758069  |
| 24               | 6                | 0              | -1.379831               | 1.220143  | 0.757300  |
| 25               | 6                | 0              | 0.513089                | -0.000034 | 1.940754  |
| 26               | 6                | 0              | -2.532987               | -1.191797 | -0.035025 |
| 27               | 6                | 0              | -3.107217               | 0.001323  | -0.475122 |
| 28               | 6                | 0              | -2.531654               | 1.194062  | -0.035813 |
| 29               | 8                | 0              | 0.434189                | 0.000114  | 3.154764  |
| 30               | 6                | 0              | 3.010942                | -0.001455 | 2.367215  |
| 31               | 1                | 0              | 2.910146                | -0.881566 | 3.008058  |
| 32               | 1                | 0              | 4.008111                | -0.001974 | 1.916848  |
| 33               | 1                | 0              | 2.911091                | 0.878722  | 3.008117  |
| 34               | 6                | 0              | -0.916256               | -2.563458 | 1.276462  |
| 35               | 1                | 0              | -1.785157               | -3.170226 | 1.554864  |
| 36               | 1                | 0              | -0.353735               | -3.121811 | 0.521508  |

|    |   |   |           |           |           |
|----|---|---|-----------|-----------|-----------|
| 37 | 1 | 0 | -0.287117 | -2.469775 | 2.164667  |
| 38 | 6 | 0 | -0.913548 | 2.564776  | 1.274932  |
| 39 | 1 | 0 | -0.351172 | 3.122488  | 0.519398  |
| 40 | 1 | 0 | -1.781829 | 3.172243  | 1.553758  |
| 41 | 1 | 0 | -0.283860 | 2.470976  | 2.162726  |
| 42 | 6 | 0 | -4.325424 | 0.001696  | -1.368011 |
| 43 | 1 | 0 | -4.039377 | 0.000803  | -2.428504 |
| 44 | 1 | 0 | -4.947004 | -0.884330 | -1.199550 |
| 45 | 1 | 0 | -4.945643 | 0.888883  | -1.200667 |
| 46 | 1 | 0 | -3.005200 | 2.140040  | -0.293242 |
| 47 | 1 | 0 | -3.007610 | -2.137398 | -0.291851 |

---

**Compound 5 - Ground State syn (cis)**

Method: B3LYP/6-31g(d)  
 SCF Done: E(RB+HF-LYP) = -1081.67311416 A.U. after 8 cycles  
 Imaginary frequencies: 0 (15.6)

This molecule is an asymmetric top.

Rotational symmetry number 1.

Warning -- assumption of classical behavior for rotation  
 may cause significant error

|                                  |                        |         |         |
|----------------------------------|------------------------|---------|---------|
| Rotational temperatures (Kelvin) | 0.01383                | 0.00776 | 0.00754 |
| Rotational constants (GHZ):      | 0.28808                | 0.16170 | 0.15705 |
| Zero-point vibrational energy    | 1174915.0 (Joules/Mol) |         |         |
|                                  | 280.81143 (Kcal/Mol)   |         |         |

Warning -- explicit consideration of 42 degrees of freedom as  
 vibrations may cause significant error

|                                              |                             |
|----------------------------------------------|-----------------------------|
| Zero-point correction=                       | 0.447501 (Hartree/Particle) |
| Thermal correction to Energy=                | 0.472405                    |
| Thermal correction to Enthalpy=              | 0.473349                    |
| Thermal correction to Gibbs Free Energy=     | 0.392805                    |
| Sum of electronic and zero-point Energies=   | -1081.225613                |
| Sum of electronic and thermal Energies=      | -1081.200709                |
| Sum of electronic and thermal Enthalpies=    | -1081.199765                |
| Sum of electronic and thermal Free Energies= | -1081.280310                |

Standard orientation:

| Center<br>Number | Atomic<br>Number | Atomic<br>Type | Coordinates (Angstroms) |           |           |
|------------------|------------------|----------------|-------------------------|-----------|-----------|
|                  |                  |                | X                       | Y         | Z         |
| 1                | 6                | 0              | 0.191221                | -0.242912 | 2.243503  |
| 2                | 1                | 0              | 0.940391                | 0.531956  | 2.370913  |
| 3                | 6                | 0              | 0.139949                | -1.311014 | 3.147105  |
| 4                | 1                | 0              | 0.840886                | -1.344798 | 3.976714  |
| 5                | 6                | 0              | -0.798166               | -2.335111 | 2.988437  |
| 6                | 1                | 0              | -0.826539               | -3.156604 | 3.699351  |
| 7                | 6                | 0              | -1.691299               | -2.315416 | 1.915290  |
| 8                | 1                | 0              | -2.410914               | -3.119792 | 1.785269  |
| 9                | 6                | 0              | -3.422607               | -1.749454 | -0.823136 |
| 10               | 1                | 0              | -3.781743               | -2.673919 | -0.377751 |
| 11               | 6                | 0              | -3.965541               | -1.288503 | -2.025376 |
| 12               | 1                | 0              | -4.751481               | -1.858139 | -2.514116 |
| 13               | 6                | 0              | -3.503160               | -0.103530 | -2.607438 |
| 14               | 1                | 0              | -3.929759               | 0.237818  | -3.546773 |
| 15               | 6                | 0              | -0.898993               | 0.855482  | 0.099254  |
| 16               | 6                | 0              | -2.493919               | 0.647956  | -1.992326 |
| 17               | 1                | 0              | -2.128011               | 1.563867  | -2.446884 |
| 18               | 6                | 0              | -0.705131               | -0.205112 | 1.177916  |
| 19               | 6                | 0              | -1.955659               | 0.190965  | -0.794737 |
| 20               | 6                | 0              | -1.637991               | -1.253426 | 1.011099  |
| 21               | 6                | 0              | -2.411337               | -1.006733 | -0.211358 |
| 22               | 6                | 0              | 1.662895                | 0.452053  | -0.680497 |
| 23               | 6                | 0              | 1.770935                | -0.881651 | -1.133584 |
| 24               | 6                | 0              | 2.822534                | 1.129700  | -0.229401 |
| 25               | 6                | 0              | 0.354300                | 1.221908  | -0.764148 |
| 26               | 6                | 0              | 3.010603                | -1.526162 | -1.061596 |
| 27               | 6                | 0              | 4.150743                | -0.899616 | -0.560350 |



|    |   |   |           |           |           |
|----|---|---|-----------|-----------|-----------|
| 28 | 6 | 0 | 4.031653  | 0.431757  | -0.158379 |
| 29 | 6 | 0 | -1.531263 | 2.200795  | 0.669221  |
| 30 | 1 | 0 | -1.712122 | 2.809142  | -0.223552 |
| 31 | 6 | 0 | -0.598330 | 2.999971  | 1.588689  |
| 32 | 1 | 0 | -1.097219 | 3.927486  | 1.893316  |
| 33 | 1 | 0 | 0.330704  | 3.281792  | 1.089910  |
| 34 | 1 | 0 | -0.356035 | 2.447862  | 2.503575  |
| 35 | 6 | 0 | -2.873039 | 1.972101  | 1.382845  |
| 36 | 1 | 0 | -2.747114 | 1.369660  | 2.289484  |
| 37 | 1 | 0 | -3.608690 | 1.477219  | 0.743745  |
| 38 | 1 | 0 | -3.290792 | 2.939622  | 1.684489  |
| 39 | 8 | 0 | 0.268753  | 2.179496  | -1.515971 |
| 40 | 1 | 0 | 3.082205  | -2.550781 | -1.421859 |
| 41 | 1 | 0 | 4.912293  | 0.955752  | 0.208108  |
| 42 | 6 | 0 | 0.619284  | -1.647817 | -1.745679 |
| 43 | 1 | 0 | 0.010454  | -2.142512 | -0.981639 |
| 44 | 1 | 0 | -0.046358 | -1.008549 | -2.331133 |
| 45 | 1 | 0 | 1.001547  | -2.427563 | -2.412310 |
| 46 | 6 | 0 | 2.823400  | 2.584055  | 0.194240  |
| 47 | 1 | 0 | 3.848978  | 2.963680  | 0.232049  |
| 48 | 1 | 0 | 2.255050  | 3.208551  | -0.498304 |
| 49 | 1 | 0 | 2.394930  | 2.720003  | 1.195032  |
| 50 | 6 | 0 | 5.479450  | -1.616186 | -0.510074 |
| 51 | 1 | 0 | 6.028925  | -1.501041 | -1.454074 |
| 52 | 1 | 0 | 6.117940  | -1.220929 | 0.287116  |
| 53 | 1 | 0 | 5.349257  | -2.690334 | -0.340038 |

-----

**Compound 5 - Ground State syn (trans)**

Method: B3LYP/6-31g(d)

SCF Done: E(RB+HF-LYP) = -1081.67340926 A.U. after 6 cycles

Imaginary frequencies: 0 (21.4)

This molecule is an asymmetric top.

Rotational symmetry number 1.

Warning -- assumption of classical behavior for rotation  
may cause significant error

|                                  |         |         |         |
|----------------------------------|---------|---------|---------|
| Rotational temperatures (Kelvin) | 0.01454 | 0.00784 | 0.00701 |
|----------------------------------|---------|---------|---------|

|                             |         |         |         |
|-----------------------------|---------|---------|---------|
| Rotational constants (GHZ): | 0.30288 | 0.16331 | 0.14606 |
|-----------------------------|---------|---------|---------|

|                               |                        |
|-------------------------------|------------------------|
| Zero-point vibrational energy | 1174023.0 (Joules/Mol) |
|-------------------------------|------------------------|

|  |                      |
|--|----------------------|
|  | 280.59823 (Kcal/Mol) |
|--|----------------------|

Warning -- explicit consideration of 41 degrees of freedom as  
vibrations may cause significant error

|                        |                             |
|------------------------|-----------------------------|
| Zero-point correction= | 0.447162 (Hartree/Particle) |
|------------------------|-----------------------------|

|                               |          |
|-------------------------------|----------|
| Thermal correction to Energy= | 0.472173 |
|-------------------------------|----------|

|                                 |          |
|---------------------------------|----------|
| Thermal correction to Enthalpy= | 0.473117 |
|---------------------------------|----------|

|                                          |          |
|------------------------------------------|----------|
| Thermal correction to Gibbs Free Energy= | 0.392852 |
|------------------------------------------|----------|

|                                            |              |
|--------------------------------------------|--------------|
| Sum of electronic and zero-point Energies= | -1081.226248 |
|--------------------------------------------|--------------|

|                                         |              |
|-----------------------------------------|--------------|
| Sum of electronic and thermal Energies= | -1081.201236 |
|-----------------------------------------|--------------|

|                                           |              |
|-------------------------------------------|--------------|
| Sum of electronic and thermal Enthalpies= | -1081.200292 |
|-------------------------------------------|--------------|

|                                              |              |
|----------------------------------------------|--------------|
| Sum of electronic and thermal Free Energies= | -1081.280557 |
|----------------------------------------------|--------------|

Standard orientation:

-----

|        |        |        |                         |
|--------|--------|--------|-------------------------|
| Center | Atomic | Atomic | Coordinates (Angstroms) |
|--------|--------|--------|-------------------------|

| Number | Number | Type | X         | Y         | Z         |
|--------|--------|------|-----------|-----------|-----------|
| 1      | 6      | 0    | -0.405477 | 1.275999  | 1.710421  |
| 2      | 1      | 0    | -1.189556 | 0.621859  | 2.080202  |
| 3      | 6      | 0    | -0.405386 | 2.629558  | 2.066978  |
| 4      | 1      | 0    | -1.189432 | 3.013678  | 2.713868  |
| 5      | 6      | 0    | 0.591551  | 3.490517  | 1.596892  |
| 6      | 1      | 0    | 0.578855  | 4.538808  | 1.883303  |
| 7      | 6      | 0    | 1.605277  | 3.011146  | 0.764915  |
| 8      | 1      | 0    | 2.382996  | 3.680270  | 0.405648  |
| 9      | 6      | 0    | 3.655327  | 1.313944  | -1.147734 |
| 10     | 1      | 0    | 3.988927  | 2.347721  | -1.104479 |
| 11     | 6      | 0    | 4.345652  | 0.381987  | -1.925016 |
| 12     | 1      | 0    | 5.225523  | 0.690847  | -2.483262 |
| 13     | 6      | 0    | 3.903199  | -0.942000 | -2.000256 |
| 14     | 1      | 0    | 4.437893  | -1.654499 | -2.622694 |
| 15     | 6      | 0    | 0.853472  | -0.635721 | 0.390281  |
| 16     | 6      | 0    | 2.773757  | -1.363093 | -1.287608 |
| 17     | 1      | 0    | 2.418659  | -2.382768 | -1.376131 |
| 18     | 6      | 0    | 0.595337  | 0.793232  | 0.872023  |
| 19     | 6      | 0    | 2.094385  | -0.443257 | -0.491537 |
| 20     | 6      | 0    | 1.603666  | 1.661418  | 0.407108  |
| 21     | 6      | 0    | 2.527014  | 0.898481  | -0.438820 |
| 22     | 6      | 0    | -1.688662 | -0.660991 | -0.488090 |
| 23     | 6      | 0    | -1.946847 | 0.442432  | -1.322077 |
| 24     | 6      | 0    | -2.742699 | -1.286900 | 0.213157  |
| 25     | 6      | 0    | -0.302479 | -1.274416 | -0.442536 |
| 26     | 6      | 0    | -3.254939 | 0.934764  | -1.401642 |
| 27     | 6      | 0    | -4.305311 | 0.370628  | -0.677642 |
| 28     | 6      | 0    | -4.027078 | -0.746602 | 0.117060  |
| 29     | 6      | 0    | 1.134919  | -1.557547 | 1.665676  |
| 30     | 1      | 0    | 0.201644  | -1.533576 | 2.246323  |
| 31     | 6      | 0    | 2.242926  | -0.971568 | 2.559675  |
| 32     | 1      | 0    | 2.366160  | -1.605292 | 3.445338  |
| 33     | 1      | 0    | 2.014615  | 0.040805  | 2.901260  |
| 34     | 1      | 0    | 3.202832  | -0.947681 | 2.032379  |
| 35     | 6      | 0    | 1.464113  | -3.026899 | 1.363186  |
| 36     | 1      | 0    | 2.426955  | -3.115849 | 0.849278  |
| 37     | 1      | 0    | 0.708640  | -3.520437 | 0.750726  |
| 38     | 1      | 0    | 1.547800  | -3.572242 | 2.310912  |
| 39     | 8      | 0    | -0.097109 | -2.309435 | -1.053098 |
| 40     | 1      | 0    | -3.453844 | 1.780593  | -2.057266 |
| 41     | 1      | 0    | -4.837568 | -1.225116 | 0.663726  |
| 42     | 6      | 0    | -0.866298 | 1.097874  | -2.154104 |
| 43     | 1      | 0    | -0.380513 | 1.914298  | -1.606812 |
| 44     | 1      | 0    | -0.084658 | 0.392764  | -2.452420 |
| 45     | 1      | 0    | -1.293888 | 1.523750  | -3.067794 |
| 46     | 6      | 0    | -2.524362 | -2.538230 | 1.036784  |
| 47     | 1      | 0    | -3.468049 | -2.884190 | 1.468802  |
| 48     | 1      | 0    | -2.114142 | -3.347212 | 0.423397  |
| 49     | 1      | 0    | -1.824839 | -2.376595 | 1.866090  |
| 50     | 6      | 0    | -5.700901 | 0.944864  | -0.747561 |
| 51     | 1      | 0    | -6.461579 | 0.156821  | -0.718043 |
| 52     | 1      | 0    | -5.898042 | 1.615880  | 0.099343  |
| 53     | 1      | 0    | -5.849469 | 1.525129  | -1.664119 |

**Compound 5 - Transition State Phenyl-CO rotation 0° (correlated)**

Method: B3LYP/6-31g(d)  
 SCF Done: E(RB+HF-LYP) = -1081.65277086 A.U. after 10 cycles  
 Imaginary frequencies: 1 (-71.2)

This molecule is an asymmetric top.

Rotational symmetry number 1.

Warning -- assumption of classical behavior for rotation  
 may cause significant error

|                                  |         |         |         |
|----------------------------------|---------|---------|---------|
| Rotational temperatures (Kelvin) | 0.01333 | 0.00724 | 0.00716 |
| Rotational constants (GHZ):      | 0.27770 | 0.15080 | 0.14909 |

1 imaginary frequencies ignored.

|                               |                        |
|-------------------------------|------------------------|
| Zero-point vibrational energy | 1177902.0 (Joules/Mol) |
|                               | 281.52533 (Kcal/Mol)   |

Warning -- explicit consideration of 41 degrees of freedom as  
 vibrations may cause significant error

|                                              |                             |
|----------------------------------------------|-----------------------------|
| Zero-point correction=                       | 0.448639 (Hartree/Particle) |
| Thermal correction to Energy=                | 0.471948                    |
| Thermal correction to Enthalpy=              | 0.472892                    |
| Thermal correction to Gibbs Free Energy=     | 0.397065                    |
| Sum of electronic and zero-point Energies=   | -1081.204132                |
| Sum of electronic and thermal Energies=      | -1081.180823                |
| Sum of electronic and thermal Enthalpies=    | -1081.179878                |
| Sum of electronic and thermal Free Energies= | -1081.255705                |

Standard orientation:

| Center Number | Atomic Number | Atomic Type | Coordinates (Angstroms) |           |           |
|---------------|---------------|-------------|-------------------------|-----------|-----------|
|               |               |             | X                       | Y         | Z         |
| 1             | 6             | 0           | -0.937557               | 1.219037  | 2.290179  |
| 2             | 1             | 0           | -0.260853               | 2.068393  | 2.240757  |
| 3             | 6             | 0           | -1.489188               | 0.824204  | 3.515318  |
| 4             | 1             | 0           | -1.230631               | 1.365843  | 4.421143  |
| 5             | 6             | 0           | -2.370360               | -0.260078 | 3.583079  |
| 6             | 1             | 0           | -2.792170               | -0.551613 | 4.541214  |
| 7             | 6             | 0           | -2.709352               | -0.976266 | 2.431777  |
| 8             | 1             | 0           | -3.389899               | -1.821822 | 2.492954  |
| 9             | 6             | 0           | -2.973717               | -2.290164 | -0.581184 |
| 10            | 1             | 0           | -3.602891               | -2.860769 | 0.097381  |
| 11            | 6             | 0           | -2.838284               | -2.683909 | -1.914896 |
| 12            | 1             | 0           | -3.370959               | -3.559870 | -2.275270 |
| 13            | 6             | 0           | -2.013922               | -1.965354 | -2.786336 |
| 14            | 1             | 0           | -1.906740               | -2.289613 | -3.817932 |
| 15            | 6             | 0           | -0.890731               | 0.795362  | -0.307210 |
| 16            | 6             | 0           | -1.323496               | -0.829779 | -2.343421 |
| 17            | 1             | 0           | -0.681688               | -0.283931 | -3.028518 |
| 18            | 6             | 0           | -1.272390               | 0.508604  | 1.143348  |
| 19            | 6             | 0           | -1.455984               | -0.429880 | -1.016843 |
| 20            | 6             | 0           | -2.153915               | -0.591471 | 1.210440  |
| 21            | 6             | 0           | -2.275414               | -1.168538 | -0.133403 |
| 22            | 6             | 0           | 1.896724                | 0.321550  | -0.170502 |
| 23            | 6             | 0           | 1.954325                | -1.072849 | 0.137366  |
| 24            | 6             | 0           | 3.153208                | 1.030533  | -0.239452 |
| 25            | 6             | 0           | 0.651178                | 1.161103  | -0.450781 |
| 26            | 6             | 0           | 3.195518                | -1.698743 | 0.312330  |

|    |   |   |           |           |           |
|----|---|---|-----------|-----------|-----------|
| 27 | 6 | 0 | 4.408171  | -1.028364 | 0.216479  |
| 28 | 6 | 0 | 4.351102  | 0.337415  | -0.044890 |
| 29 | 8 | 0 | 0.846274  | 2.323650  | -0.780969 |
| 30 | 6 | 0 | -1.728662 | 2.078070  | -0.782936 |
| 31 | 1 | 0 | -1.267573 | 2.918465  | -0.258258 |
| 32 | 1 | 0 | 5.281625  | 0.897463  | -0.098836 |
| 33 | 1 | 0 | 3.202924  | -2.761593 | 0.541353  |
| 34 | 6 | 0 | 3.344904  | 2.515633  | -0.492157 |
| 35 | 1 | 0 | 3.018403  | 2.813487  | -1.491654 |
| 36 | 1 | 0 | 2.776312  | 3.136271  | 0.204778  |
| 37 | 1 | 0 | 4.407421  | 2.761532  | -0.387014 |
| 38 | 6 | 0 | 0.778325  | -2.001829 | 0.317957  |
| 39 | 1 | 0 | 1.132151  | -2.969453 | 0.684971  |
| 40 | 1 | 0 | 0.063275  | -1.623089 | 1.047240  |
| 41 | 1 | 0 | 0.244389  | -2.184439 | -0.616262 |
| 42 | 6 | 0 | 5.725305  | -1.744598 | 0.381405  |
| 43 | 1 | 0 | 6.164924  | -1.989296 | -0.594830 |
| 44 | 1 | 0 | 6.453772  | -1.125101 | 0.916129  |
| 45 | 1 | 0 | 5.605422  | -2.683709 | 0.931127  |
| 46 | 6 | 0 | -1.635199 | 2.362797  | -2.291832 |
| 47 | 1 | 0 | -2.230977 | 1.648808  | -2.870883 |
| 48 | 1 | 0 | -2.041128 | 3.361684  | -2.491608 |
| 49 | 1 | 0 | -0.607488 | 2.348493  | -2.658491 |
| 50 | 6 | 0 | -3.213874 | 2.033662  | -0.383596 |
| 51 | 1 | 0 | -3.360144 | 1.992966  | 0.698606  |
| 52 | 1 | 0 | -3.702690 | 2.944144  | -0.749891 |
| 53 | 1 | 0 | -3.735260 | 1.180661  | -0.831899 |

-----

**Compound 5 - Transition State Phenyl-CO rotation 90° (correlated)**

Method: B3LYP/6-31g(d)

SCF Done: E(RB+HF-LYP) = -1081.66573106 A.U. after 7 cycles

Imaginary frequencies: 1 (-19.9)

This molecule is an asymmetric top.

Rotational symmetry number 1.

Warning -- assumption of classical behavior for rotation  
may cause significant error

Rotational temperatures (Kelvin) 0.01222 0.00894 0.00813

Rotational constants (GHZ): 0.25460 0.18624 0.16939

1 imaginary frequencies ignored.

Zero-point vibrational energy 1175847.4 (Joules/Mol)

281.03426 (Kcal/Mol)

Warning -- explicit consideration of 40 degrees of freedom as  
vibrations may cause significant error

Zero-point correction= 0.447857 (Hartree/Particle)

Thermal correction to Energy= 0.471588

Thermal correction to Enthalpy= 0.472532

Thermal correction to Gibbs Free Energy= 0.396635

Sum of electronic and zero-point Energies= -1081.217874

Sum of electronic and thermal Energies= -1081.194143

Sum of electronic and thermal Enthalpies= -1081.193199

Sum of electronic and thermal Free Energies= -1081.269096

Standard orientation:

| Center<br>Number | Atomic<br>Number | Atomic<br>Type | Coordinates (Angstroms) |           |           |
|------------------|------------------|----------------|-------------------------|-----------|-----------|
|                  |                  |                | X                       | Y         | Z         |
| 1                | 6                | 0              | -0.578458               | 2.694497  | 0.174317  |
| 2                | 1                | 0              | -0.591593               | 3.152614  | -0.810318 |
| 3                | 6                | 0              | -0.304078               | 3.475932  | 1.302299  |
| 4                | 1                | 0              | -0.097781               | 4.536314  | 1.183808  |
| 5                | 6                | 0              | -0.299815               | 2.905590  | 2.579741  |
| 6                | 1                | 0              | -0.080748               | 3.524159  | 3.445923  |
| 7                | 6                | 0              | -0.597276               | 1.552942  | 2.750827  |
| 8                | 1                | 0              | -0.621064               | 1.117955  | 3.746665  |
| 9                | 6                | 0              | -1.582178               | -1.556964 | 2.512677  |
| 10               | 1                | 0              | -1.399752               | -1.321352 | 3.557969  |
| 11               | 6                | 0              | -2.094563               | -2.803069 | 2.149402  |
| 12               | 1                | 0              | -2.307357               | -3.544398 | 2.915023  |
| 13               | 6                | 0              | -2.344628               | -3.098447 | 0.805606  |
| 14               | 1                | 0              | -2.751039               | -4.068423 | 0.532108  |
| 15               | 6                | 0              | -1.216926               | 0.295012  | -0.731028 |
| 16               | 6                | 0              | -2.069465               | -2.160168 | -0.195579 |
| 17               | 1                | 0              | -2.247078               | -2.421322 | -1.232591 |
| 18               | 6                | 0              | -0.848714               | 1.338406  | 0.335070  |
| 19               | 6                | 0              | -1.556013               | -0.912232 | 0.154981  |
| 20               | 6                | 0              | -0.884123               | 0.777164  | 1.625925  |
| 21               | 6                | 0              | -1.326534               | -0.613571 | 1.515735  |
| 22               | 6                | 0              | 1.421286                | -0.229660 | -0.979156 |
| 23               | 6                | 0              | 1.814575                | -1.523949 | -0.576500 |
| 24               | 6                | 0              | 2.354424                | 0.830944  | -0.902659 |
| 25               | 6                | 0              | 0.065017                | 0.038510  | -1.626011 |
| 26               | 6                | 0              | 3.062511                | -1.697050 | 0.032048  |
| 27               | 6                | 0              | 3.951575                | -0.639994 | 0.226146  |
| 28               | 6                | 0              | 3.587069                | 0.607352  | -0.281211 |
| 29               | 8                | 0              | -0.003895               | 0.148500  | -2.836092 |
| 30               | 6                | 0              | -2.409092               | 0.801946  | -1.623008 |
| 31               | 1                | 0              | -1.993333               | 1.637695  | -2.200081 |
| 32               | 6                | 0              | 0.999780                | -2.768650 | -0.856679 |
| 33               | 1                | 0              | 1.667421                | -3.578671 | -1.171571 |
| 34               | 1                | 0              | 0.454747                | -3.116982 | 0.026098  |
| 35               | 1                | 0              | 0.273812                | -2.615601 | -1.658428 |
| 36               | 6                | 0              | 2.126117                | 2.200840  | -1.509040 |
| 37               | 1                | 0              | 1.970527                | 2.961059  | -0.736096 |
| 38               | 1                | 0              | 3.010521                | 2.497371  | -2.084594 |
| 39               | 1                | 0              | 1.275334                | 2.224893  | -2.190942 |
| 40               | 6                | 0              | 5.271294                | -0.843836 | 0.931540  |
| 41               | 1                | 0              | 5.177040                | -0.656095 | 2.009662  |
| 42               | 1                | 0              | 5.636619                | -1.869477 | 0.811940  |
| 43               | 1                | 0              | 6.039941                | -0.162650 | 0.550614  |
| 44               | 1                | 0              | 4.292123                | 1.434611  | -0.216818 |
| 45               | 1                | 0              | 3.354558                | -2.700494 | 0.337316  |
| 46               | 6                | 0              | -2.957410               | -0.214440 | -2.642960 |
| 47               | 1                | 0              | -3.590200               | -0.964741 | -2.157372 |
| 48               | 1                | 0              | -3.589828               | 0.314742  | -3.365579 |
| 49               | 1                | 0              | -2.166632               | -0.715365 | -3.203068 |
| 50               | 6                | 0              | -3.584086               | 1.334435  | -0.783203 |
| 51               | 1                | 0              | -3.299389               | 2.170464  | -0.139367 |
| 52               | 1                | 0              | -4.383214               | 1.680849  | -1.449044 |
| 53               | 1                | 0              | -4.004209               | 0.545601  | -0.148210 |

**Compound 5 - Transition State isopropyl rotation**

Method: B3LYP/6-31g(d)  
 SCF Done: E(RB+HF-LYP) = -1081.66350201 A.U. after 10 cycles  
 Imaginary frequencies: 1 (-76.6)

This molecule is an asymmetric top.

Rotational symmetry number 1.

Warning -- assumption of classical behavior for rotation  
 may cause significant error

|                                  |         |         |         |
|----------------------------------|---------|---------|---------|
| Rotational temperatures (Kelvin) | 0.01398 | 0.00776 | 0.00743 |
| Rotational constants (GHZ):      | 0.29140 | 0.16179 | 0.15476 |

1 imaginary frequencies ignored.

|                               |                        |
|-------------------------------|------------------------|
| Zero-point vibrational energy | 1173639.5 (Joules/Mol) |
|                               | 280.50657 (Kcal/Mol)   |

Warning -- explicit consideration of 40 degrees of freedom as  
 vibrations may cause significant error

|                                              |                             |
|----------------------------------------------|-----------------------------|
| Zero-point correction=                       | 0.447016 (Hartree/Particle) |
| Thermal correction to Energy=                | 0.471219                    |
| Thermal correction to Enthalpy=              | 0.472163                    |
| Thermal correction to Gibbs Free Energy=     | 0.393653                    |
| Sum of electronic and zero-point Energies=   | -1081.216486                |
| Sum of electronic and thermal Energies=      | -1081.192283                |
| Sum of electronic and thermal Enthalpies=    | -1081.191339                |
| Sum of electronic and thermal Free Energies= | -1081.269849                |

Standard orientation:

| Center Number | Atomic Number | Atomic Type | Coordinates (Angstroms) |           |           |
|---------------|---------------|-------------|-------------------------|-----------|-----------|
|               |               |             | X                       | Y         | Z         |
| 1             | 6             | 0           | -0.410930               | 0.949787  | 1.933772  |
| 2             | 1             | 0           | -1.194209               | 0.245634  | 2.195404  |
| 3             | 6             | 0           | -0.436232               | 2.239074  | 2.476639  |
| 4             | 1             | 0           | -1.231999               | 2.515052  | 3.163108  |
| 5             | 6             | 0           | 0.547153                | 3.173824  | 2.140087  |
| 6             | 1             | 0           | 0.517640                | 4.170214  | 2.573010  |
| 7             | 6             | 0           | 1.556392                | 2.839192  | 1.235911  |
| 8             | 1             | 0           | 2.306680                | 3.573368  | 0.953578  |
| 9             | 6             | 0           | 3.477698                | 1.558744  | -1.082008 |
| 10            | 1             | 0           | 3.811457                | 2.571451  | -0.870270 |
| 11            | 6             | 0           | 4.066109                | 0.823242  | -2.112851 |
| 12            | 1             | 0           | 4.871951                | 1.260638  | -2.696259 |
| 13            | 6             | 0           | 3.608357                | -0.463408 | -2.413159 |
| 14            | 1             | 0           | 4.054356                | -1.017098 | -3.234974 |
| 15            | 6             | 0           | 0.885740                | -0.740729 | 0.353982  |
| 16            | 6             | 0           | 2.576131                | -1.047359 | -1.669428 |
| 17            | 1             | 0           | 2.208709                | -2.036994 | -1.919514 |
| 18            | 6             | 0           | 0.605889                | 0.595343  | 1.049531  |
| 19            | 6             | 0           | 2.009622                | -0.331335 | -0.618306 |
| 20            | 6             | 0           | 1.574188                | 1.555433  | 0.687273  |
| 21            | 6             | 0           | 2.440155                | 0.981976  | -0.347541 |
| 22            | 6             | 0           | -1.641478               | -0.661306 | -0.573648 |
| 23            | 6             | 0           | -1.854302               | 0.458499  | -1.398825 |
| 24            | 6             | 0           | -2.720439               | -1.251718 | 0.120432  |
| 25            | 6             | 0           | -0.288733               | -1.336330 | -0.481351 |
| 26            | 6             | 0           | -3.145976               | 0.990297  | -1.488406 |

|    |   |   |           |           |           |
|----|---|---|-----------|-----------|-----------|
| 27 | 6 | 0 | -4.222045 | 0.454067  | -0.780049 |
| 28 | 6 | 0 | -3.986797 | -0.672215 | 0.014828  |
| 29 | 6 | 0 | 1.348490  | -1.911246 | 1.386756  |
| 30 | 1 | 0 | 0.647389  | -2.735163 | 1.225437  |
| 31 | 6 | 0 | 1.263174  | -1.518265 | 2.870389  |
| 32 | 1 | 0 | 1.555570  | -2.380692 | 3.481072  |
| 33 | 1 | 0 | 0.256703  | -1.225670 | 3.179572  |
| 34 | 1 | 0 | 1.938747  | -0.691598 | 3.114921  |
| 35 | 6 | 0 | 2.748761  | -2.482051 | 1.111425  |
| 36 | 1 | 0 | 3.530339  | -1.722232 | 1.221075  |
| 37 | 1 | 0 | 2.833612  | -2.913894 | 0.112616  |
| 38 | 1 | 0 | 2.953401  | -3.280313 | 1.834894  |
| 39 | 8 | 0 | -0.118526 | -2.410076 | -1.034628 |
| 40 | 1 | 0 | -3.311343 | 1.848107  | -2.137447 |
| 41 | 1 | 0 | -4.815570 | -1.123217 | 0.557417  |
| 42 | 6 | 0 | -0.741269 | 1.089039  | -2.204693 |
| 43 | 1 | 0 | -0.118424 | 1.741949  | -1.582774 |
| 44 | 1 | 0 | -0.079794 | 0.340995  | -2.652930 |
| 45 | 1 | 0 | -1.152694 | 1.700151  | -3.014192 |
| 46 | 6 | 0 | -2.540554 | -2.498898 | 0.960473  |
| 47 | 1 | 0 | -3.485465 | -2.786639 | 1.430805  |
| 48 | 1 | 0 | -2.191646 | -3.338985 | 0.351173  |
| 49 | 1 | 0 | -1.804574 | -2.358300 | 1.762736  |
| 50 | 6 | 0 | -5.597500 | 1.073559  | -0.861090 |
| 51 | 1 | 0 | -6.384141 | 0.312289  | -0.816347 |
| 52 | 1 | 0 | -5.771008 | 1.767296  | -0.027397 |
| 53 | 1 | 0 | -5.727108 | 1.640967  | -1.788547 |

---
